# Supplementary material for: Reactivity of alkynylindole-2-carboxamides in [Pd]-catalysed C–H activation and phase transfer catalysis: formation of pyrrolo-diindolones vs. β-carbolinones
Source: Royal Society of Chemistry journal article supplement (doi:10.1039/c6ob00583g), 2016-01-01
Supplement: c6ob00583g1.pdf [file c6ob00583g1.pdf]

## Electronic Supplementary Information

### Reactivity of alkynylindole-2-carboxamides in [Pd]-catalysed C-H activation and phase transfer catalysis: Formation of pyrrolo-diindolones vs $\beta$ -carbolinones

R. N. Prasad Tulichala and K. C. Kumara Swamy\*

School of Chemistry, University of Hyderabad, Hyderabad 500 046, Telangana, India.

E-mail: [kckssc@uohyd.ac.in](mailto:kckssc@uohyd.ac.in), [kckssc@yahoo.com](mailto:kckssc@yahoo.com)

|          |                                                                                                                      |                |
|----------|----------------------------------------------------------------------------------------------------------------------|----------------|
| <b>1</b> | <b>Crystal data for the compounds 9a and 10h</b>                                                                     | <b>S2</b>      |
| <b>2</b> | <b>Copies of <math>^1\text{H}/^{13}\text{C}</math> NMR spectra for starting precursors 5d, 6b, 6d, 7a-k and 8a-o</b> | <b>S3-S31</b>  |
| <b>3</b> | <b>Copies of <math>^1\text{H}/^{13}\text{C}</math> NMR spectra for final products 9a-j and 10a-o</b>                 | <b>S32-S56</b> |

### (1) Crystal data for the compounds **9a** and **10h**

**X-ray Data.** X-ray data for compounds **9a** and **10h**, were collected using MoK $\alpha$  ( $\lambda = 0.71073 \text{ \AA}$ ) radiation. The structures were solved and refined by standard methods as mentioned in the main text. The CCDC numbers are 1453189-1453190.

#### **Compound 9a**

Red color needle, C<sub>31</sub>H<sub>202</sub>N<sub>2</sub>O<sub>2</sub>,  $M = 454.51$ , Triclinic, Space group  $P-1$ ,  $a = 9.4276(5)$ ,  $b = 11.2761(9)$ ,  $c = 11.6981(10) \text{ \AA}$ ,  $V = 1137.32(14) \text{ \AA}^3$ ,  $\alpha = 112.674(8)$ ,  $\beta = 90.151(5)$ ,  $\gamma = 96.976(5)$ ,  $Z = 2$ ,  $\mu = 0.660 \text{ mm}^{-1}$ , data/restraints/parameters: 4333/0/317, R indices (I $\geq 2\sigma$ (I)): R1 = 0.0449, wR2 (all data) = 0.1166, CCDC No. 1453189.

#### **Compound 10h**

Colorless block, C<sub>26</sub>H<sub>22</sub>N<sub>2</sub>O<sub>2</sub>,  $M = 394.46$ , Triclinic, Space group  $P-1$ ,  $a = 11.5059(4)$ ,  $b = 12.8459(6)$ ,  $c = 15.6020(8) \text{ \AA}$ ,  $\alpha = 106.081(4)$ ,  $\beta = 93.226(4)$ ,  $\gamma = 109.728(4)$ ,  $V = 2056.95(16) \text{ \AA}^3$ ,  $Z = 4$ ,  $\mu = 0.643 \text{ mm}^{-1}$ , data/restraints/parameters: 7879/0/547, R indices (I $\geq 2\sigma$ (I)): R1 = 0.0488, wR2 (all data) = 0.1277, CCDC No. 1453190.

(2) Copies of  $^1\text{H}/^{13}\text{C}$  NMR spectra for starting precursors

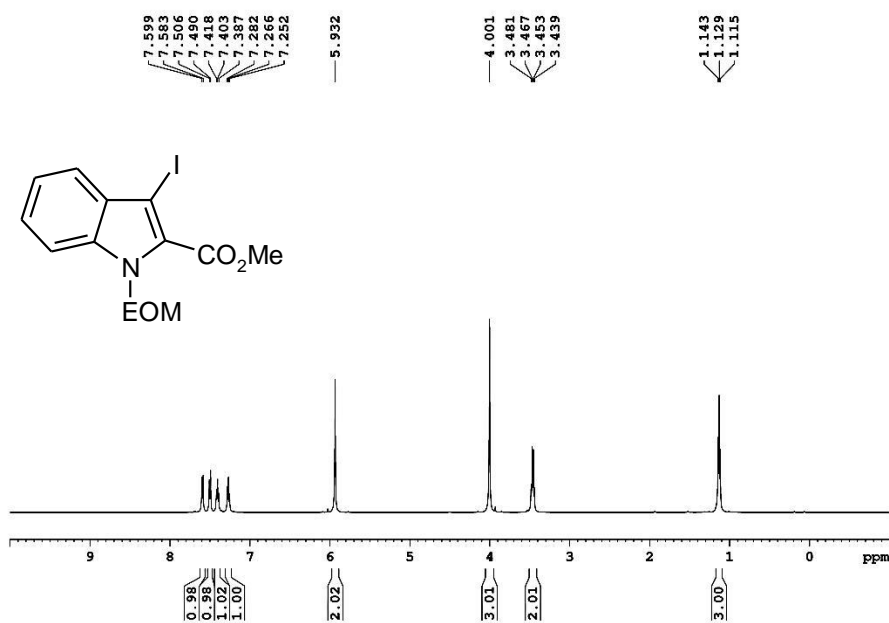

Figure S1.  $^1\text{H}$  NMR spectrum of compound **5d**

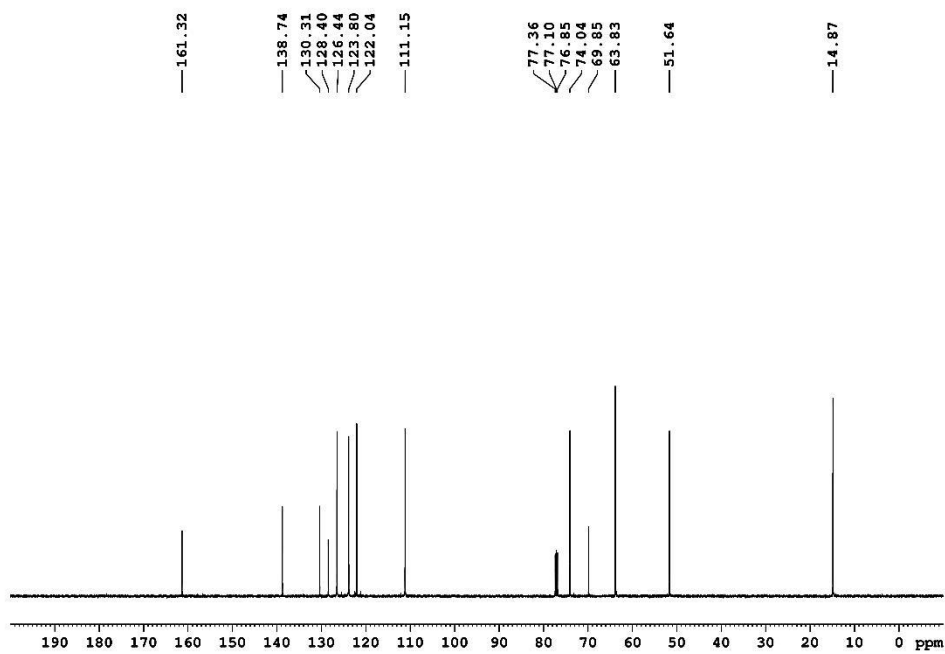

Figure S2.  $^{13}\text{C}$  NMR spectrum of compound **5d**

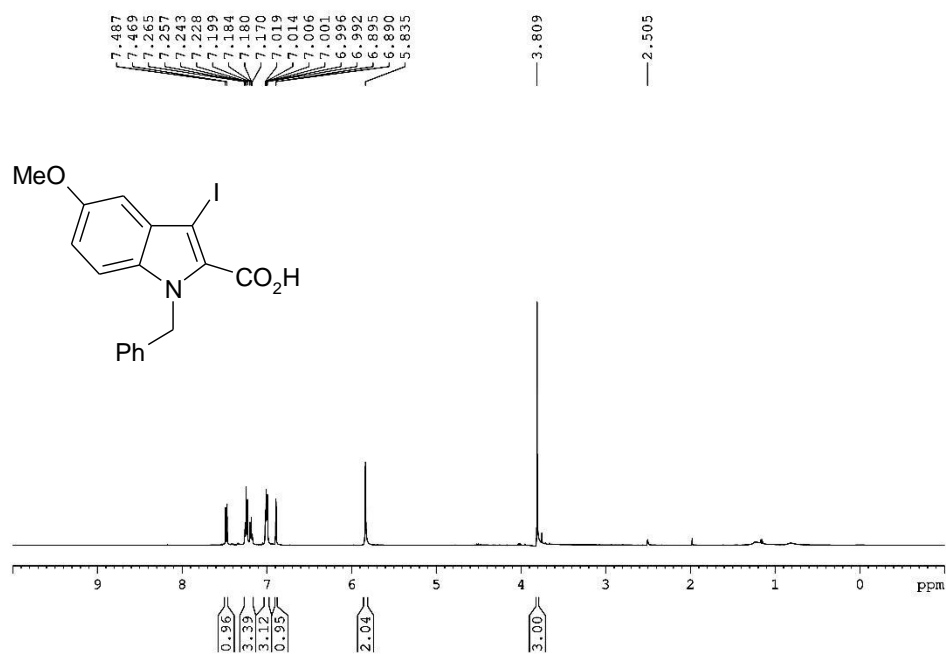

**Figure S3.** <sup>1</sup>H NMR spectrum of compound **6b**

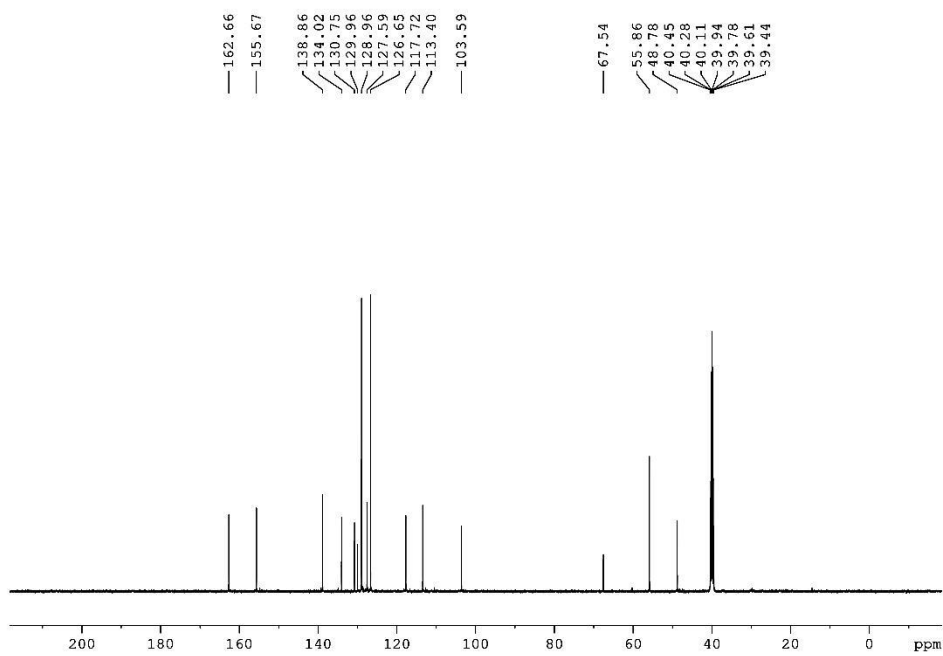

**Figure S4.** <sup>13</sup>C NMR spectrum of compound **6b**

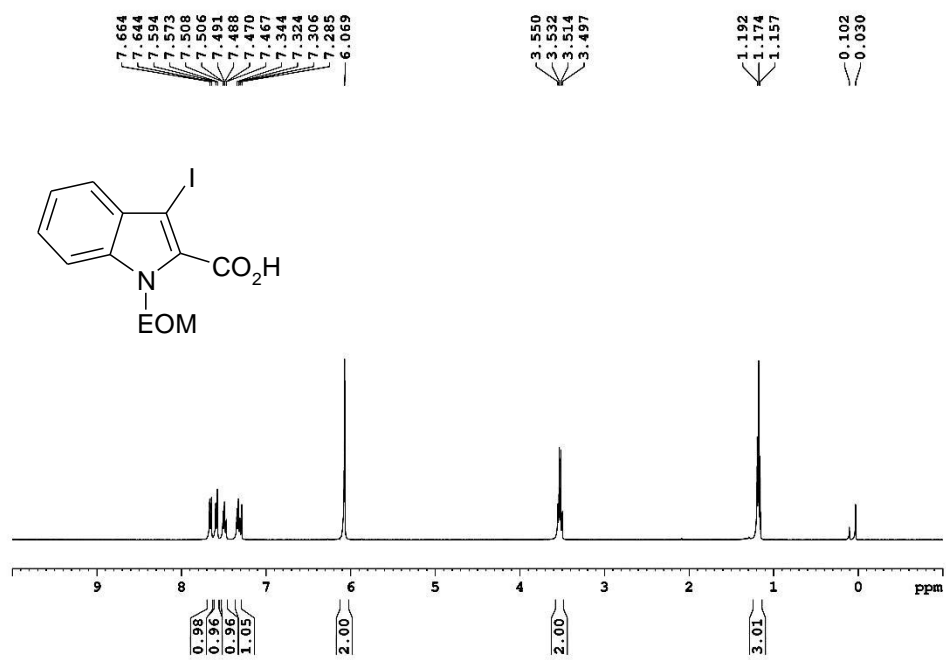

Figure S5. <sup>1</sup>H NMR spectrum of compound 6d

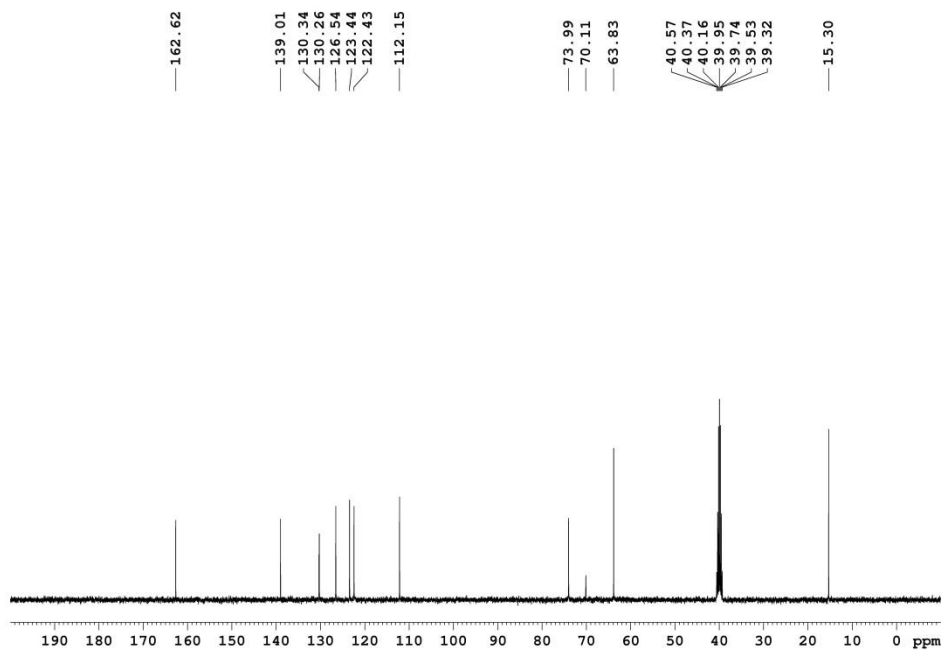

Figure S6. <sup>13</sup>C NMR spectrum of compound 6d

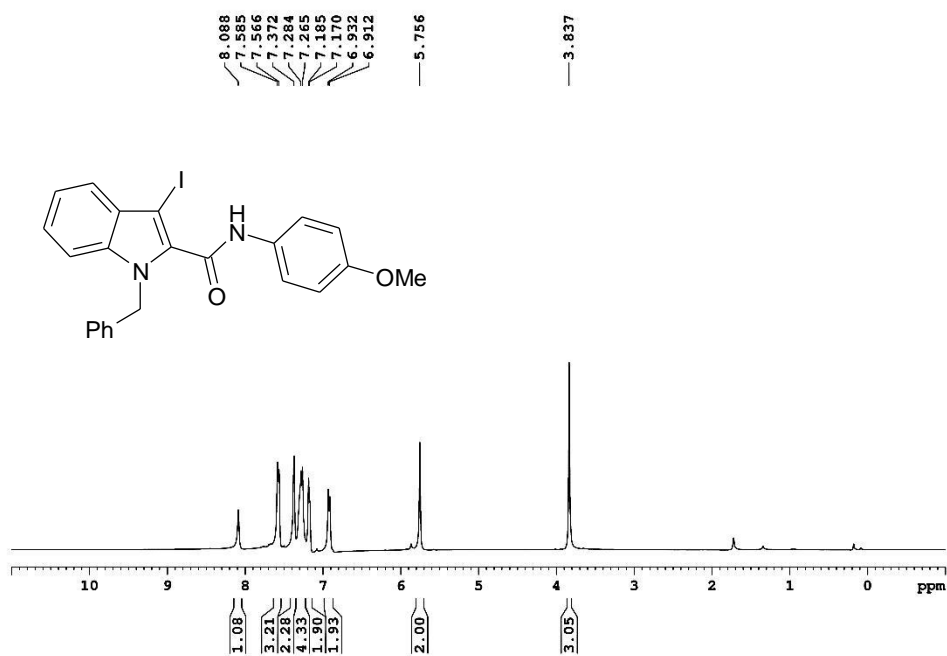

Figure S7. <sup>1</sup>H NMR spectrum of compound 7a

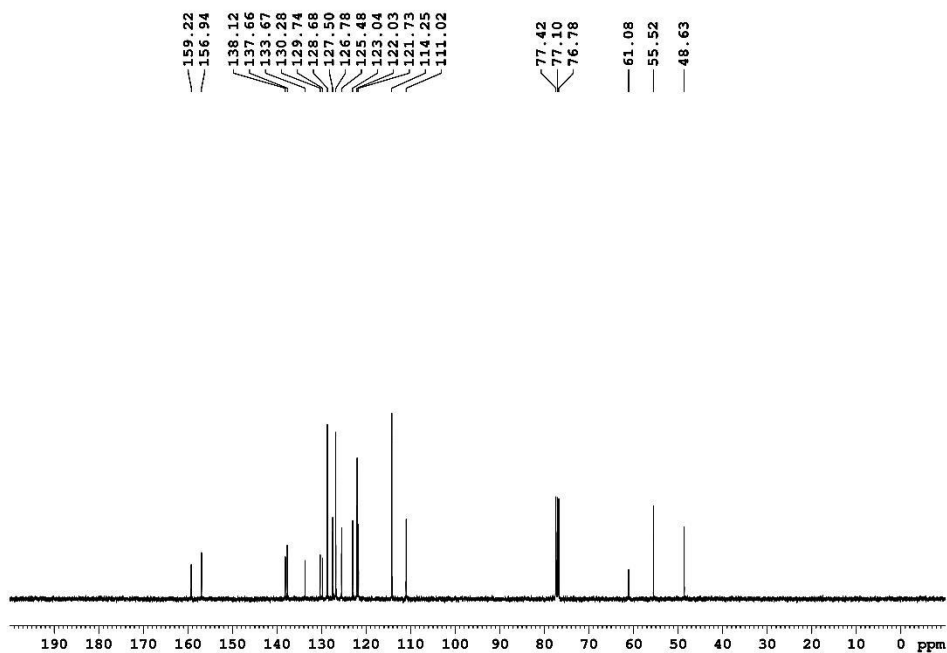

Figure S8. <sup>13</sup>C NMR spectrum of compound 7a

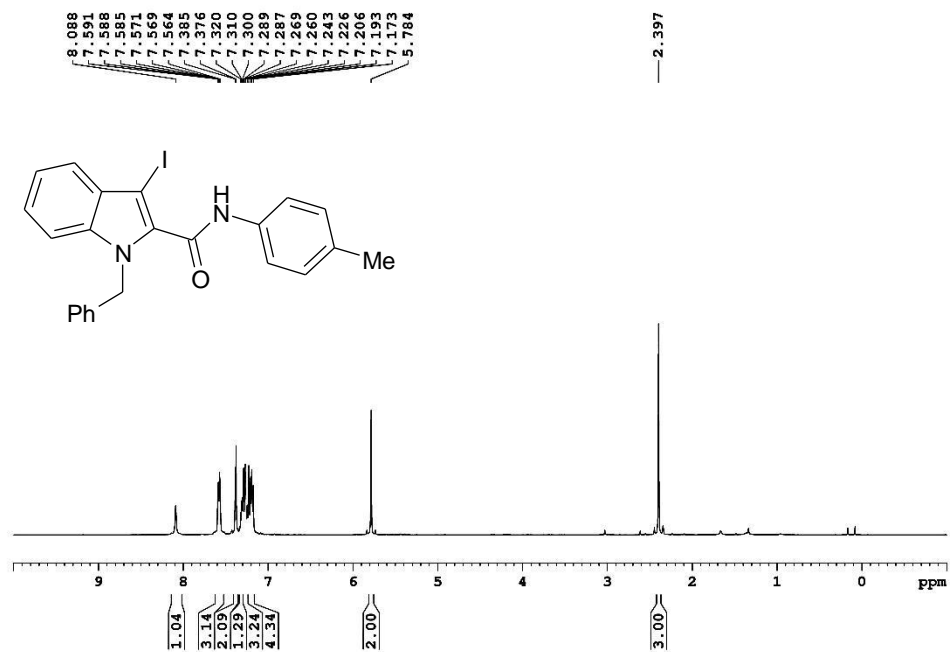

Figure S9. <sup>1</sup>H NMR spectrum of compound **7b**

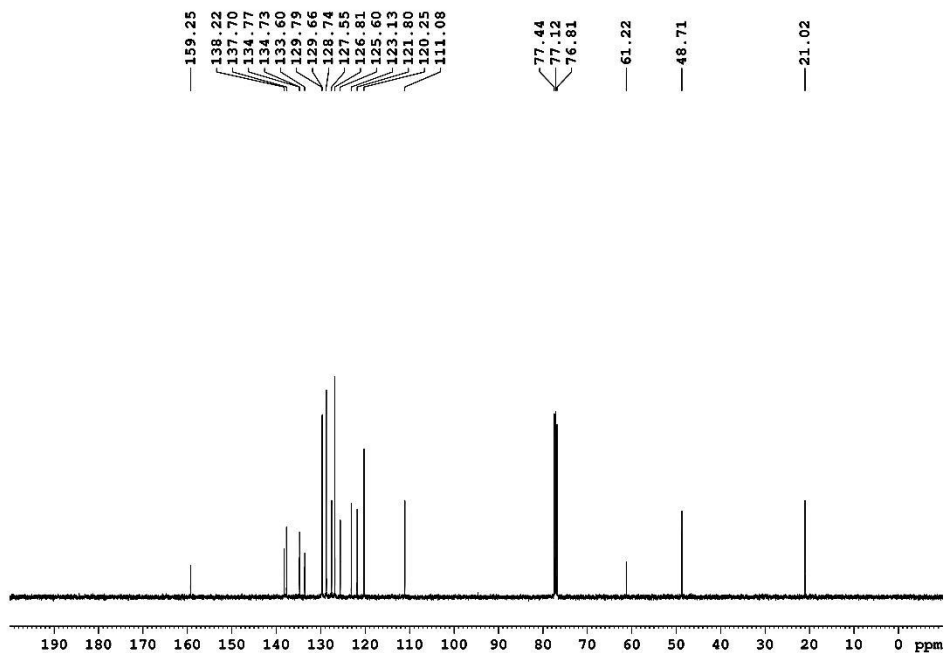

Figure S10. <sup>13</sup>C NMR spectrum of compound **7b**

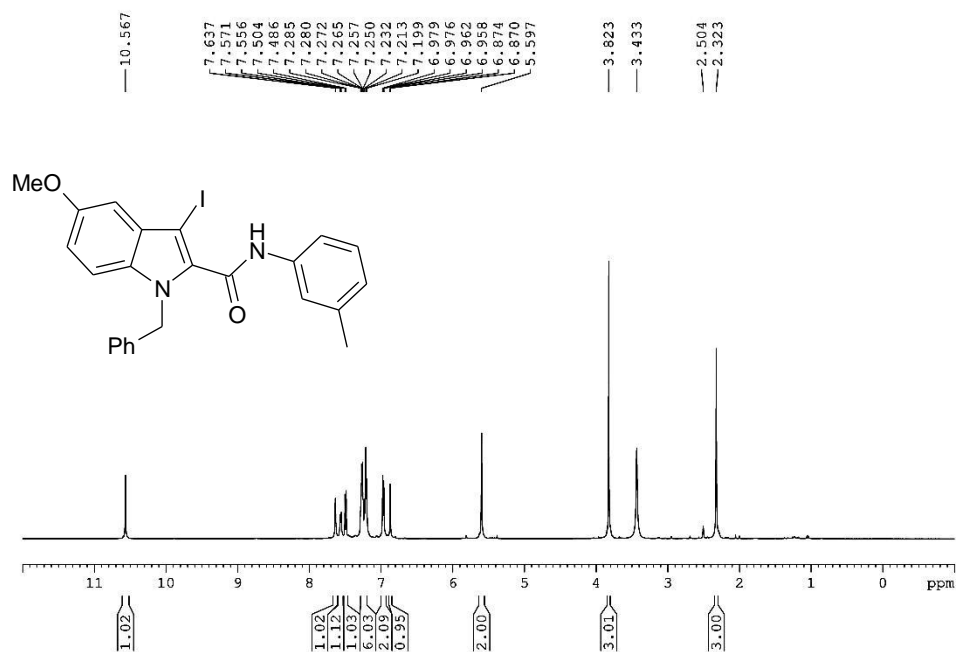

Figure S11.  $^1\text{H NMR}$  spectrum of compound **7c**

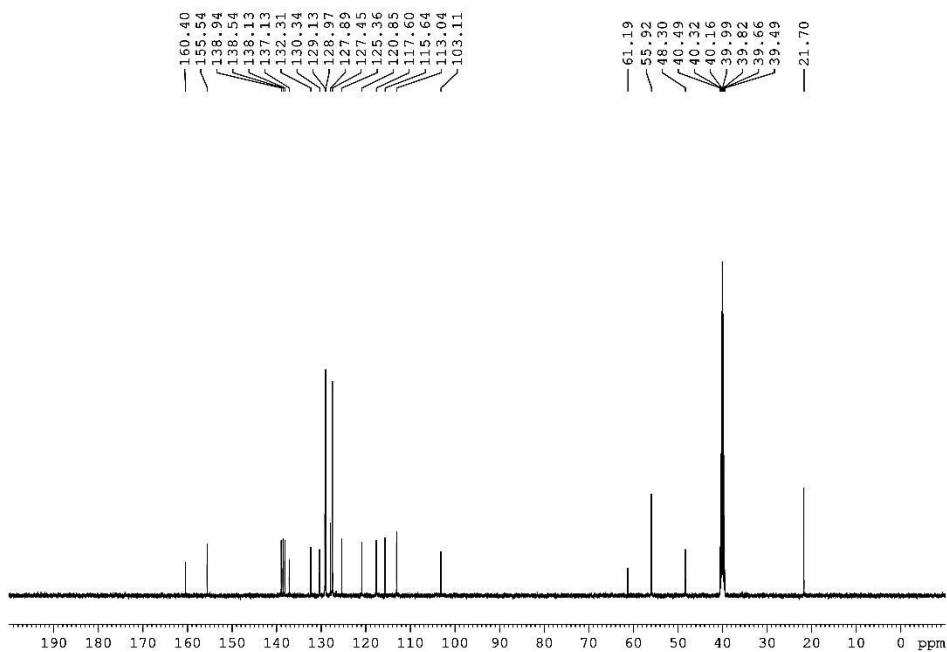

Figure S12.  $^{13}\text{C NMR}$  spectrum of compound **7c**



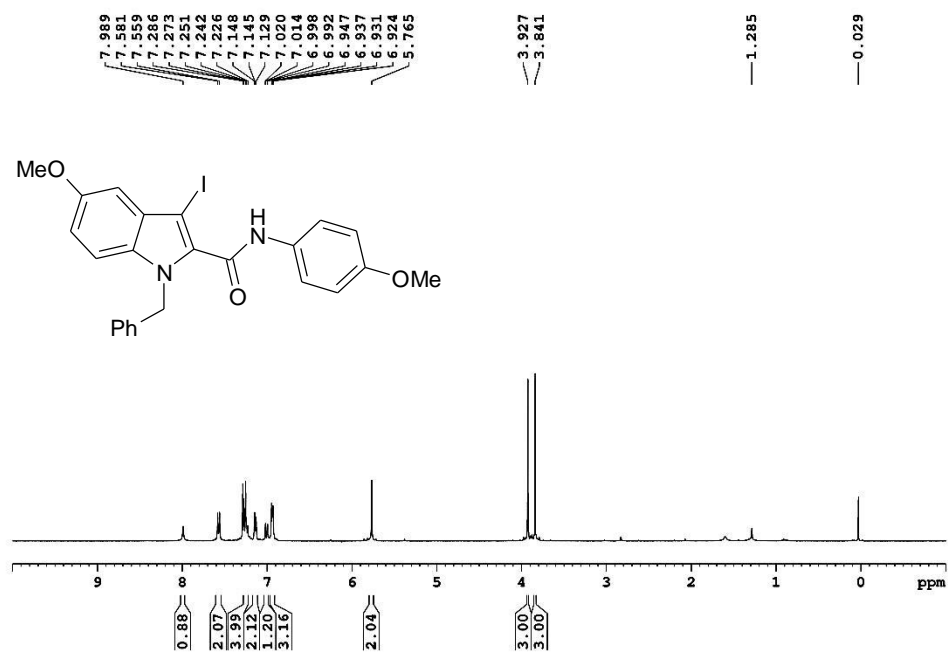

Figure S13. <sup>1</sup>H NMR spectrum of compound 7d

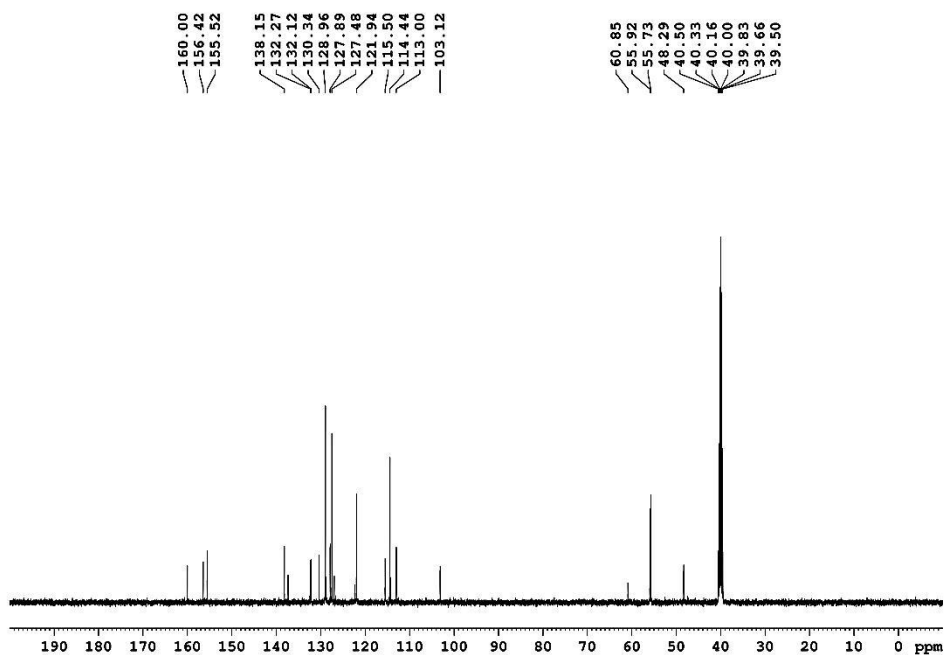

Figure S14. <sup>13</sup>C NMR spectrum of compound 7d

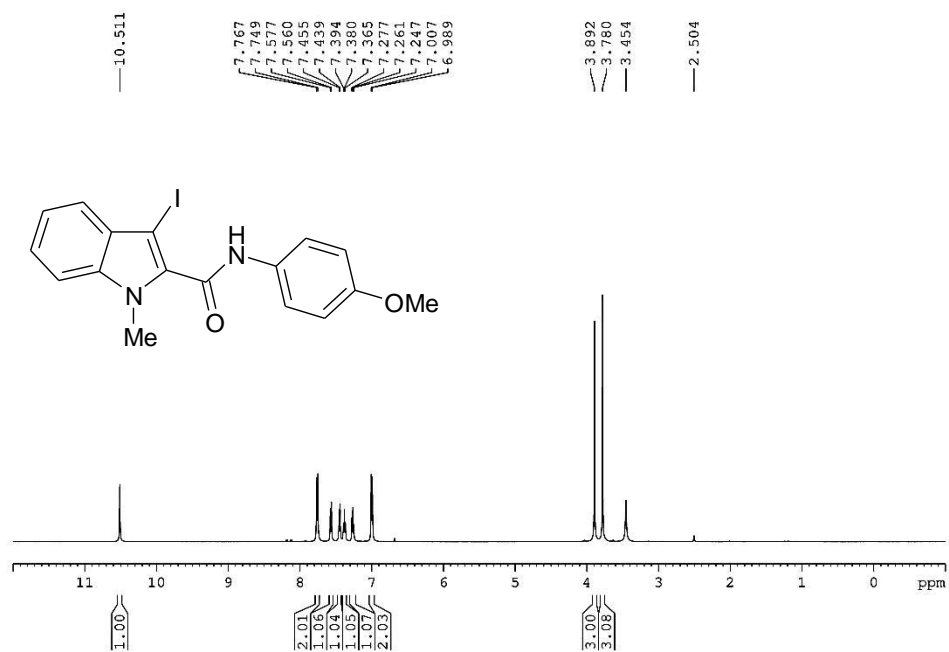

Figure S15.  $^1\text{H NMR}$  spectrum of compound **7e**

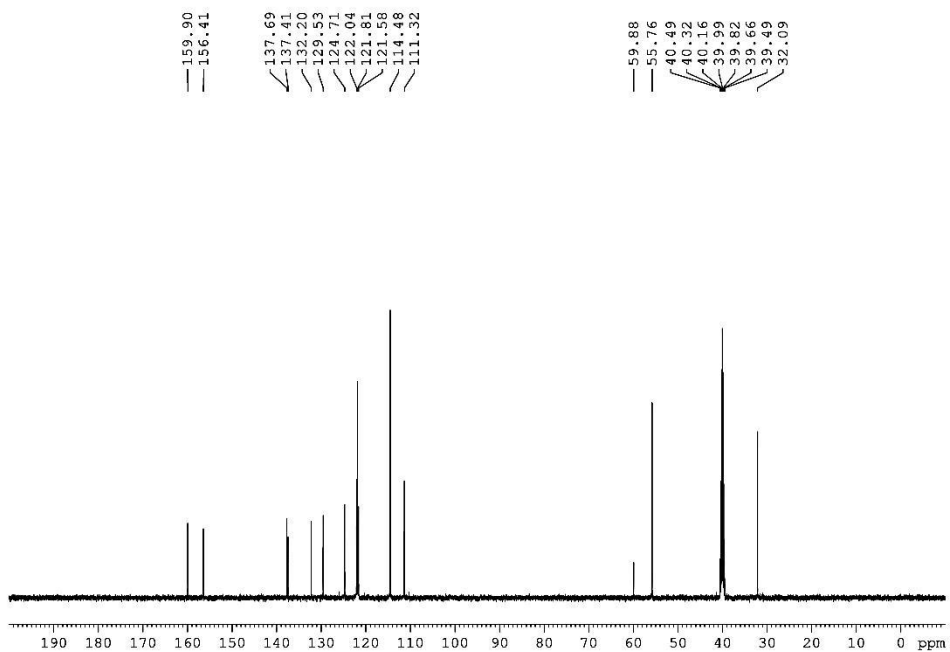

Figure S16.  $^{13}\text{C NMR}$  spectrum of compound **7e**

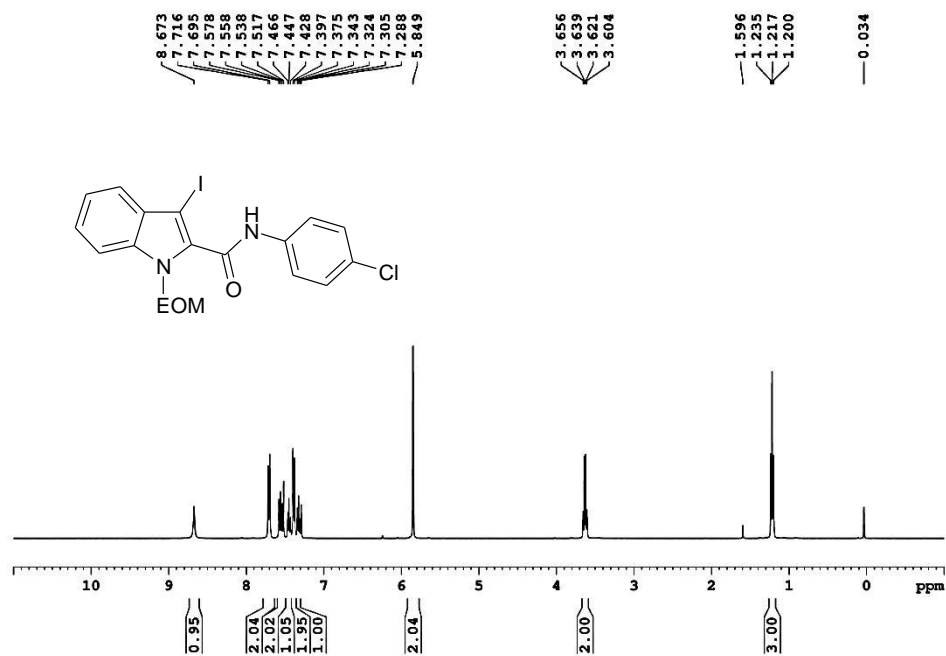

Figure S17.  $^1\text{H NMR}$  spectrum of compound **7f**

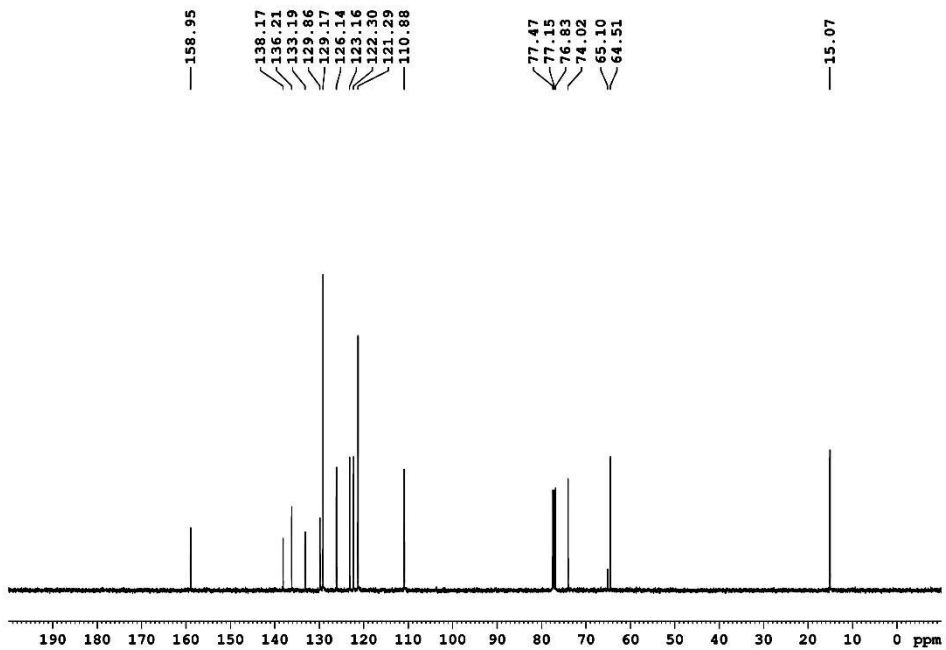

Figure S18.  $^{13}\text{C NMR}$  spectrum of compound **7f**

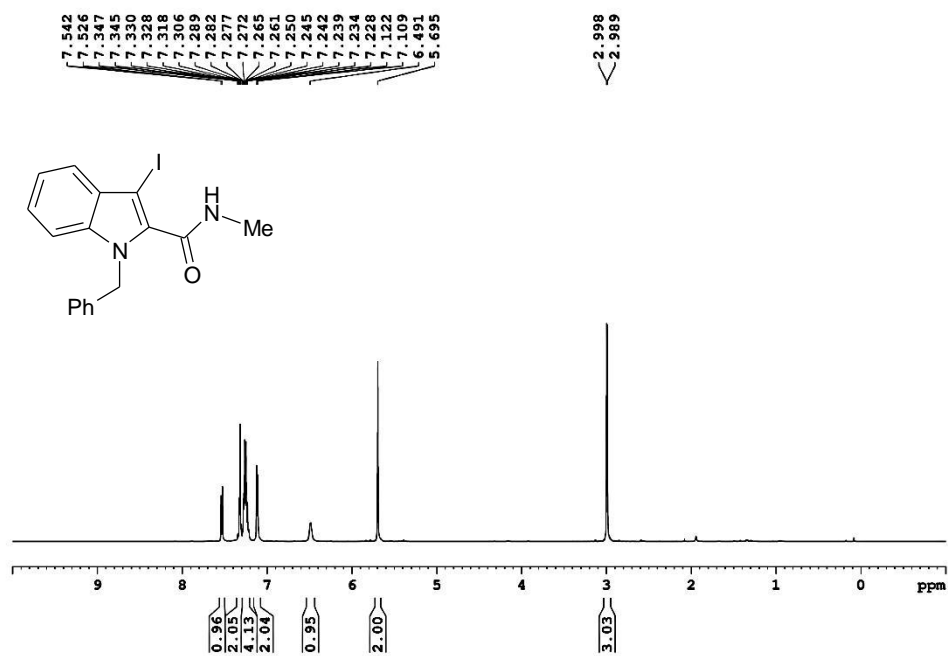

Figure S19. <sup>1</sup>H NMR spectrum of compound 7g

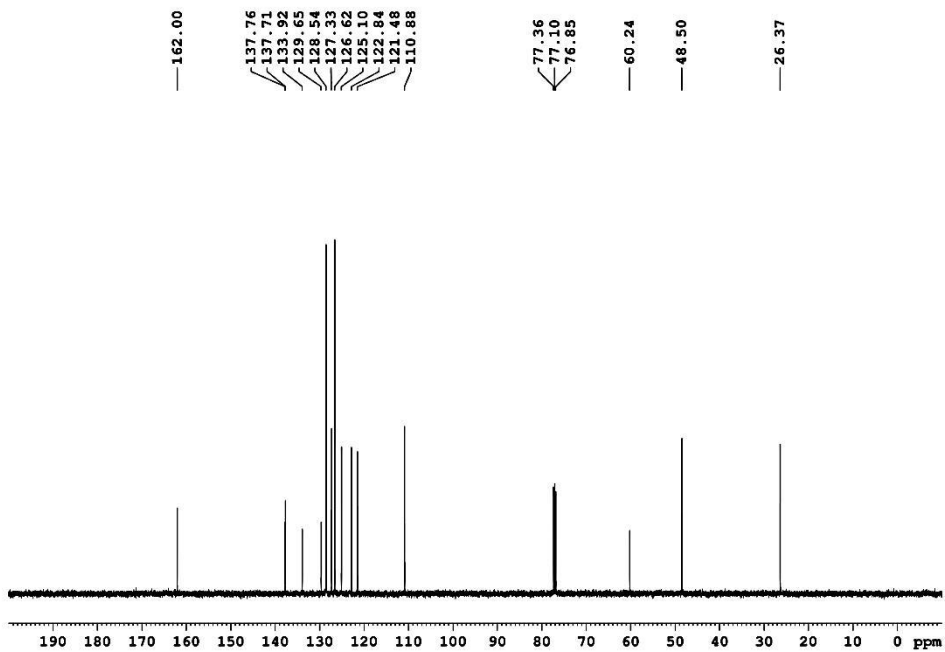

Figure S20. <sup>13</sup>C NMR spectrum of compound 7g

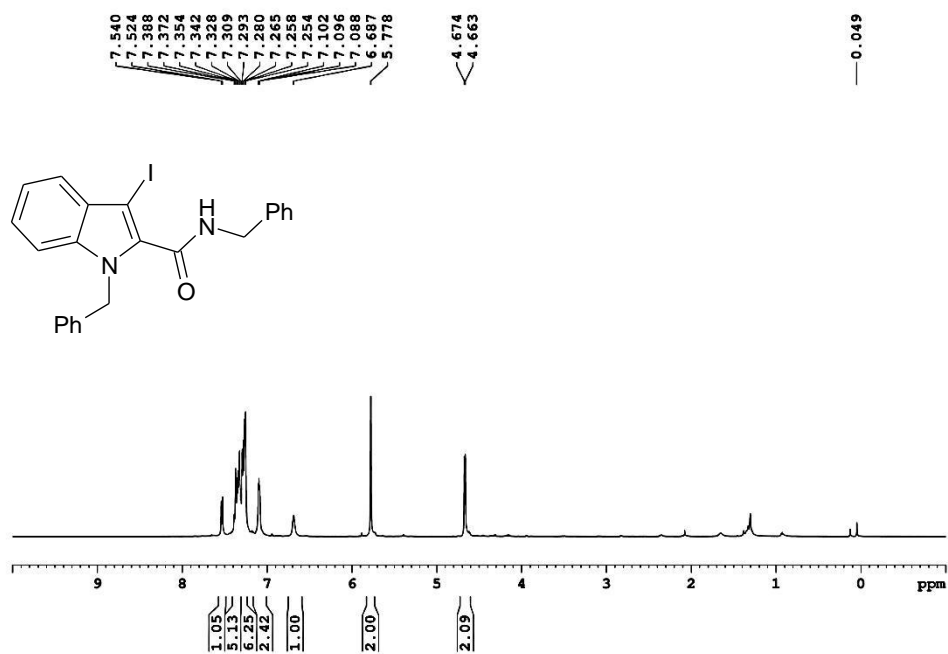

Figure S21. <sup>1</sup>H NMR spectrum of compound 7h

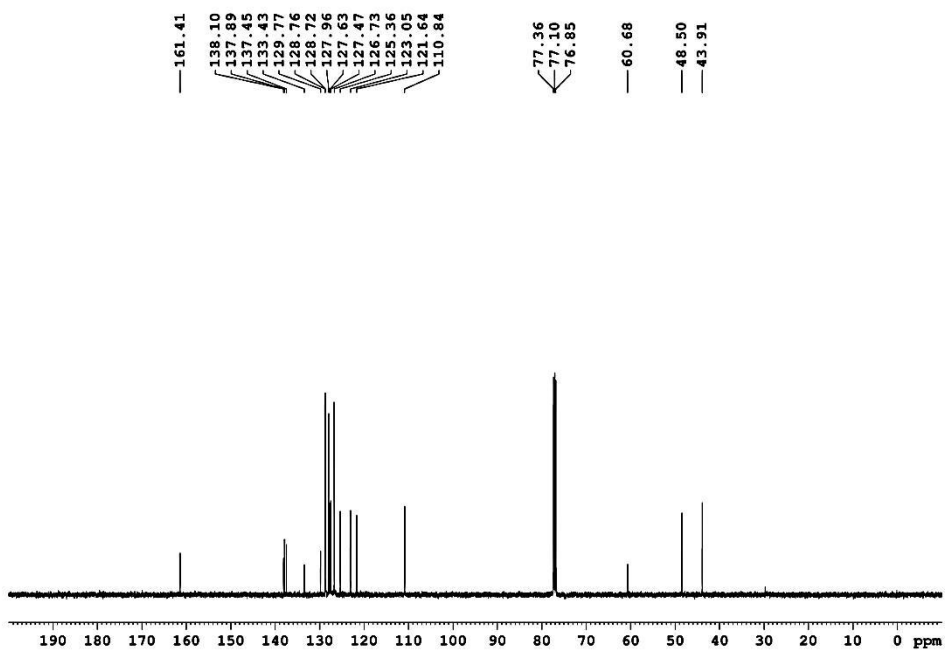

Figure S22. <sup>13</sup>C NMR spectrum of compound 7h

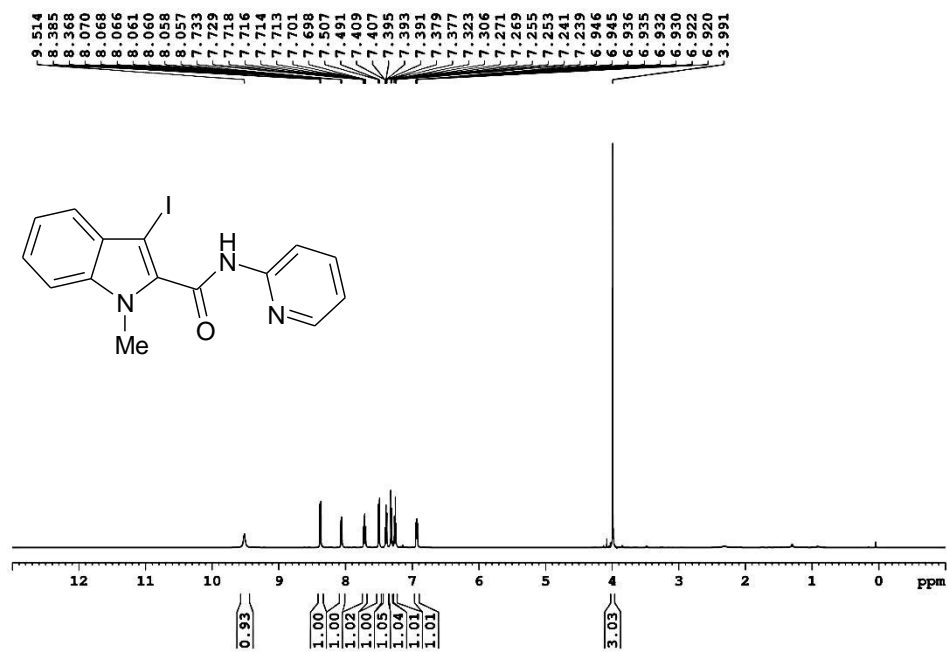

Figure S23. <sup>1</sup>H NMR spectrum of compound **7i**

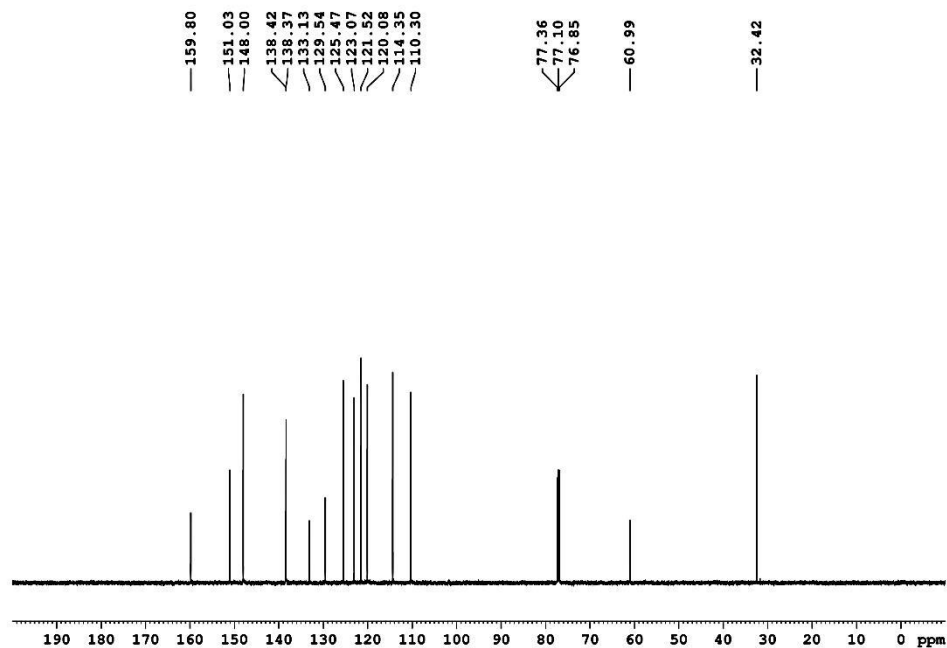

Figure S24. <sup>13</sup>C NMR spectrum of compound **7i**

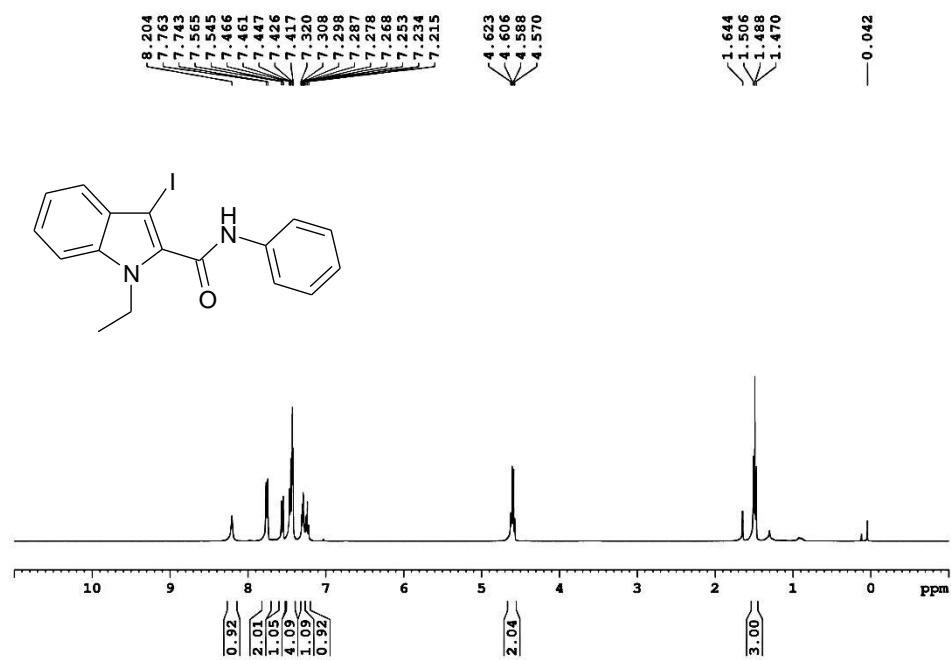

Figure S25. <sup>1</sup>H NMR spectrum of compound 7j

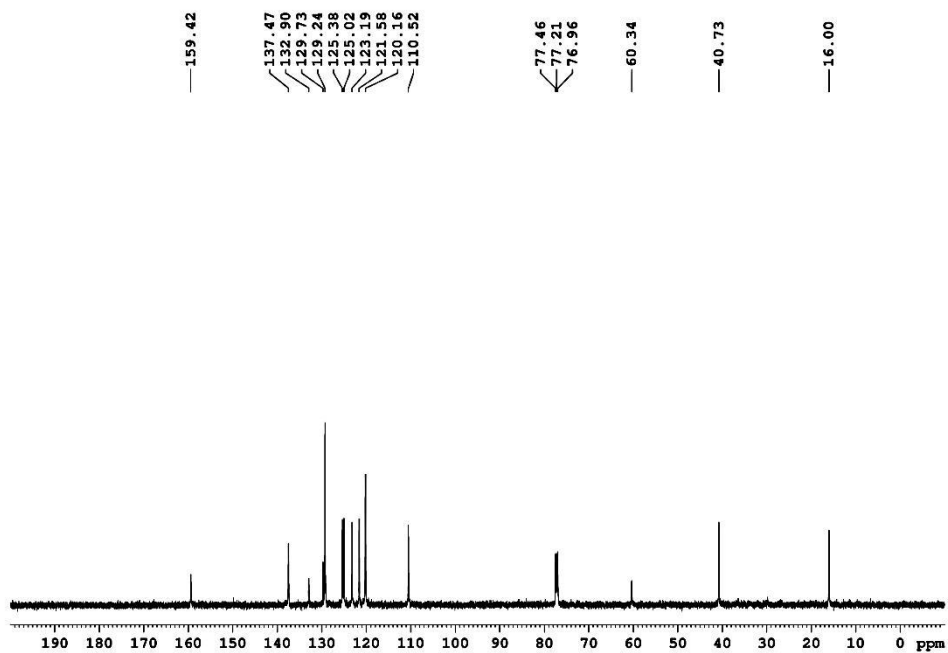

Figure S26. <sup>13</sup>C NMR spectrum of compound 7j

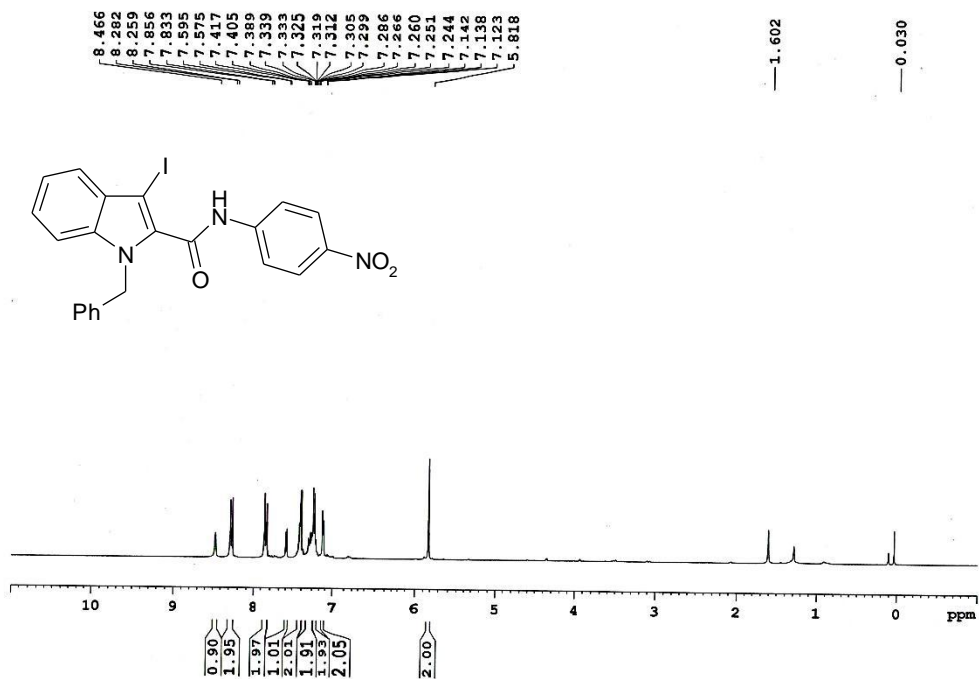

Figure S27. <sup>1</sup>H NMR spectrum of compound **7k**

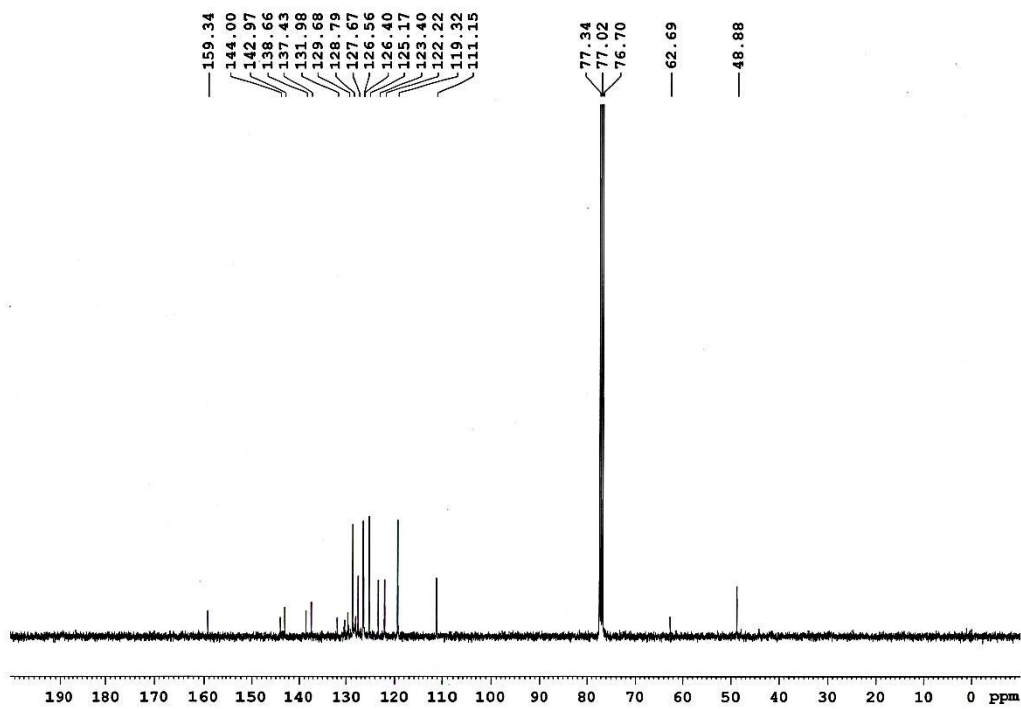

Figure S28. <sup>13</sup>C NMR spectrum of compound **7k**



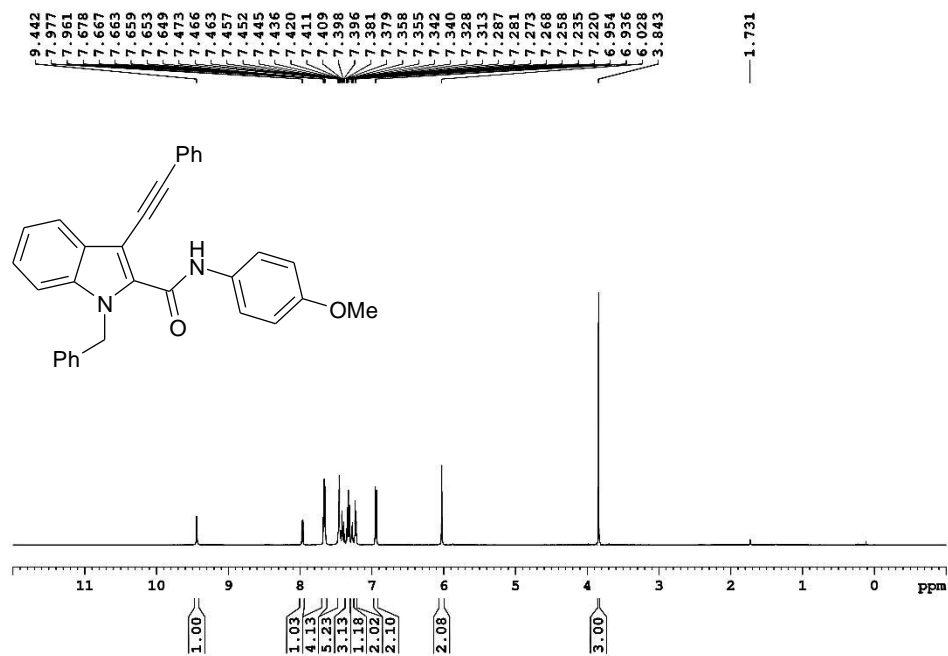

Figure S29. <sup>1</sup>H NMR spectrum of compound **8a**

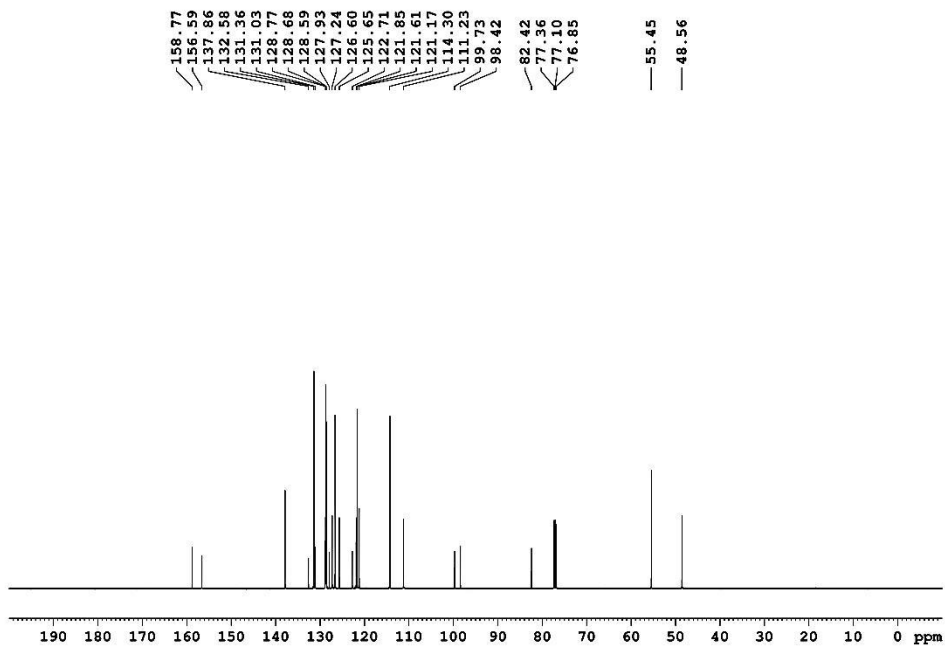

Figure S30. <sup>13</sup>C NMR spectrum of compound **8a**

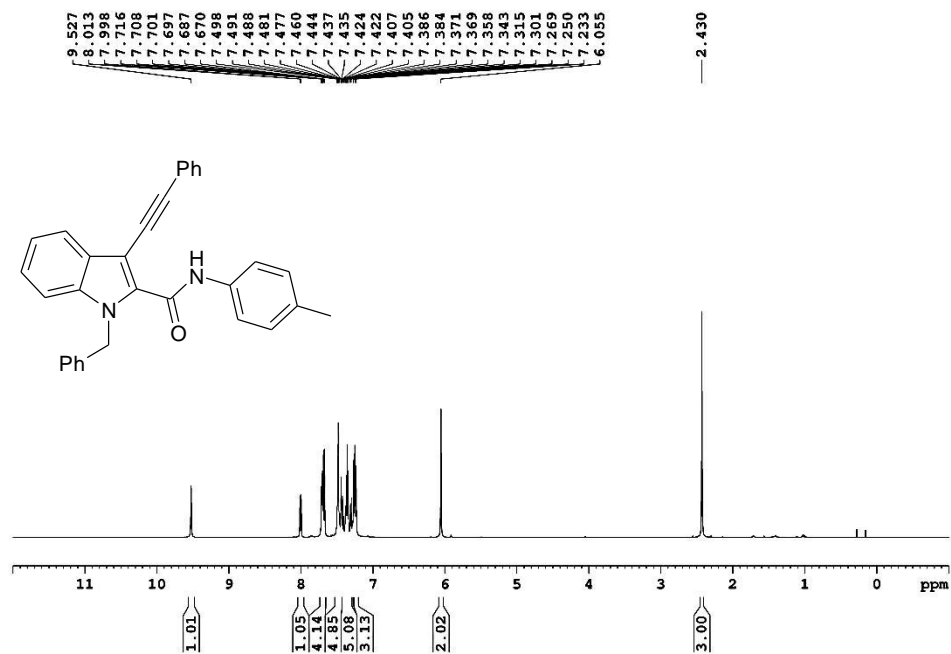

Figure S31. <sup>1</sup>H NMR spectrum of compound **8b**

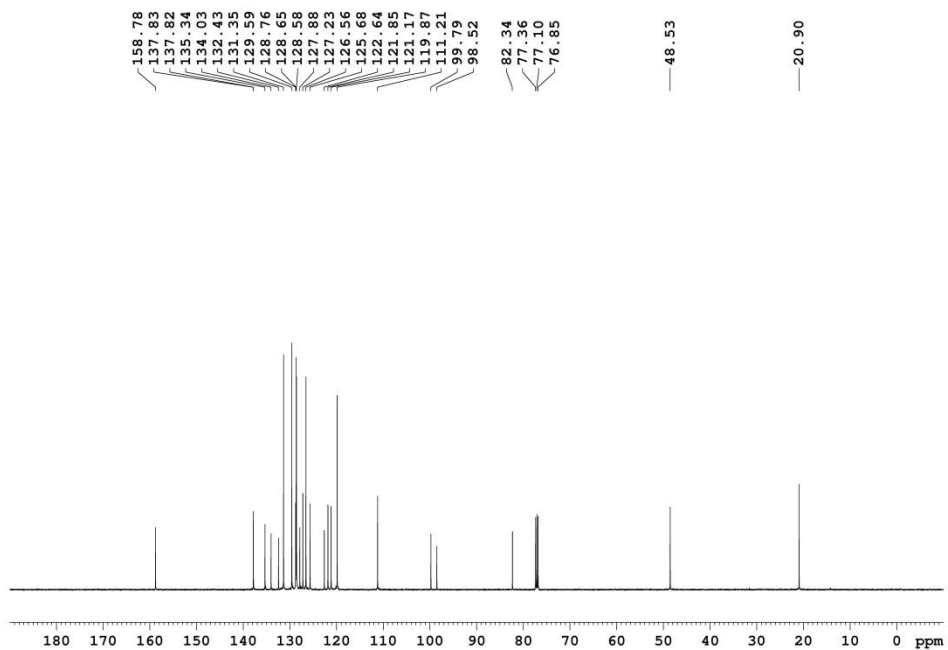

Figure S32. <sup>13</sup>C NMR spectrum of compound **8b**

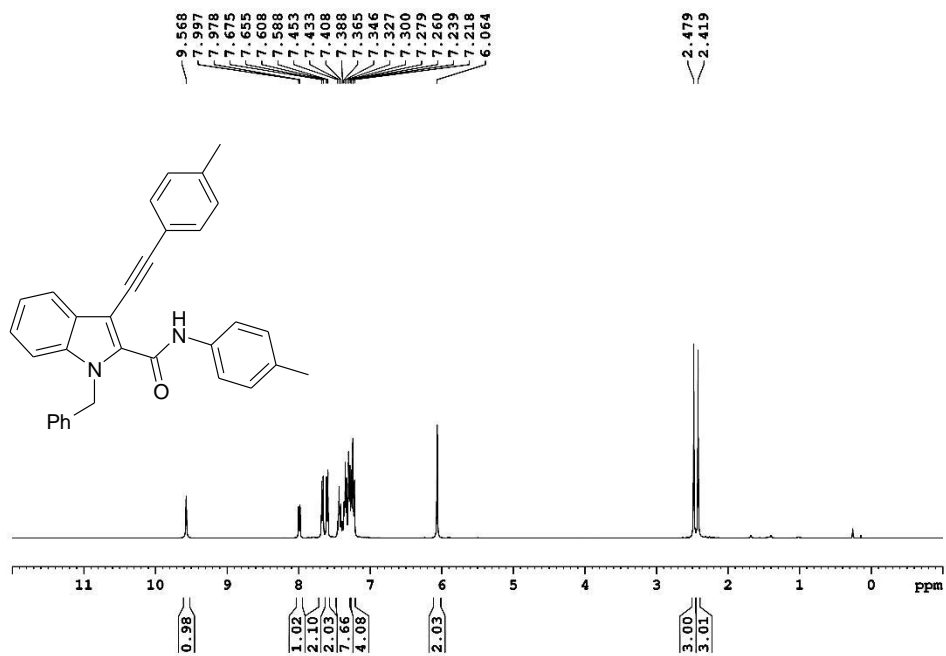

Figure S33.  $^1\text{H}$  NMR spectrum of compound **8c**

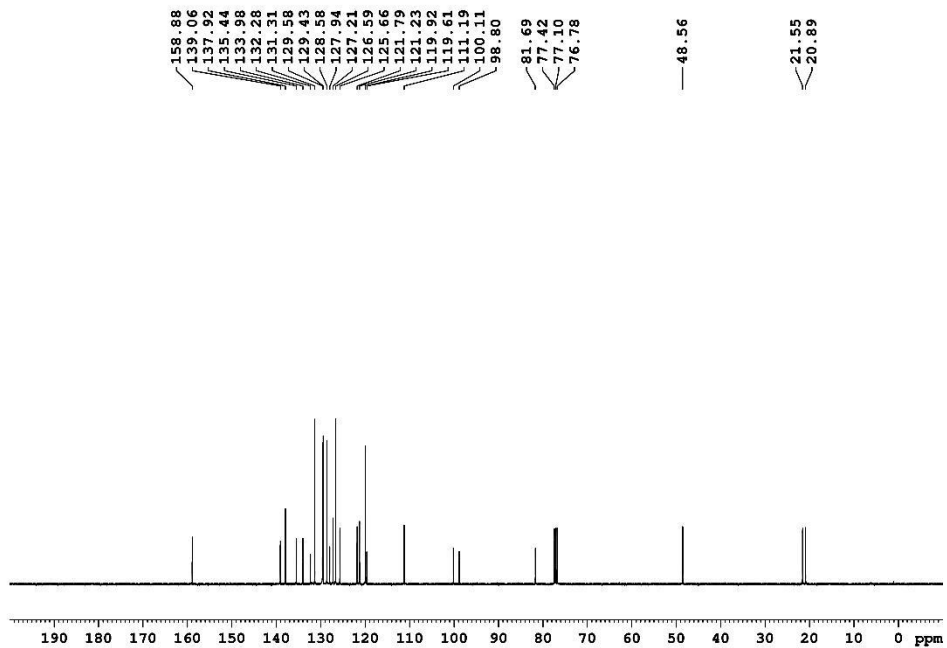

Figure S34.  $^{13}\text{C}$  NMR spectrum of compound **8c**

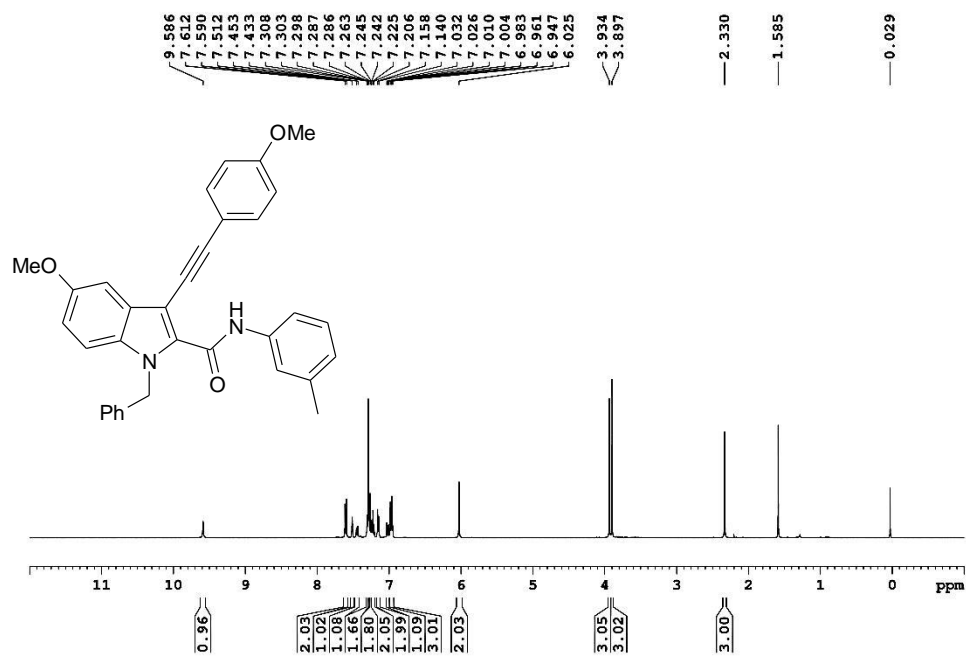

Figure S35.  $^1\text{H}$  NMR spectrum of compound **8d**

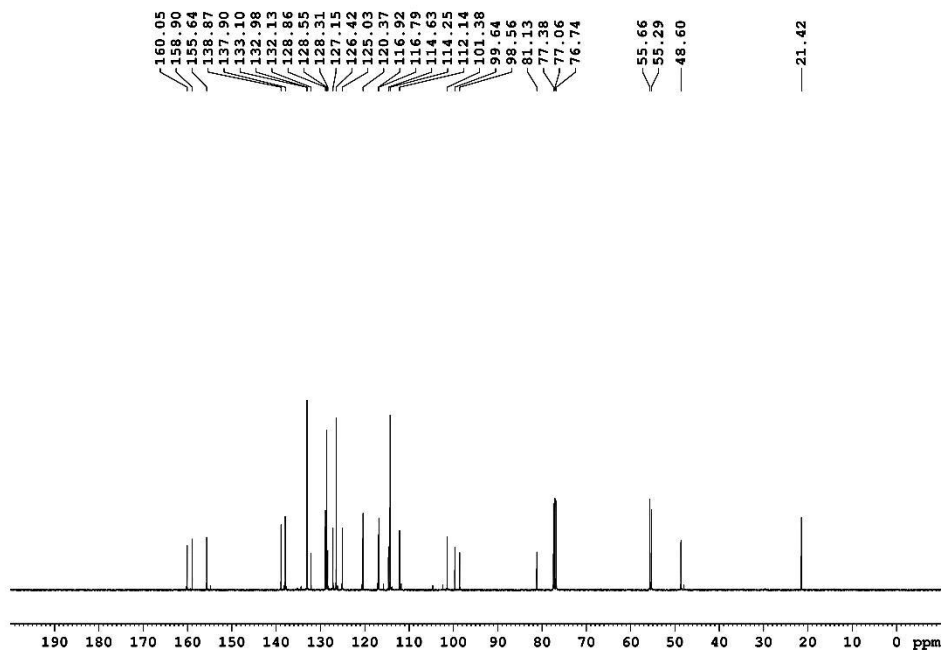

Figure S36.  $^{13}\text{C}$  NMR spectrum of compound **8d**

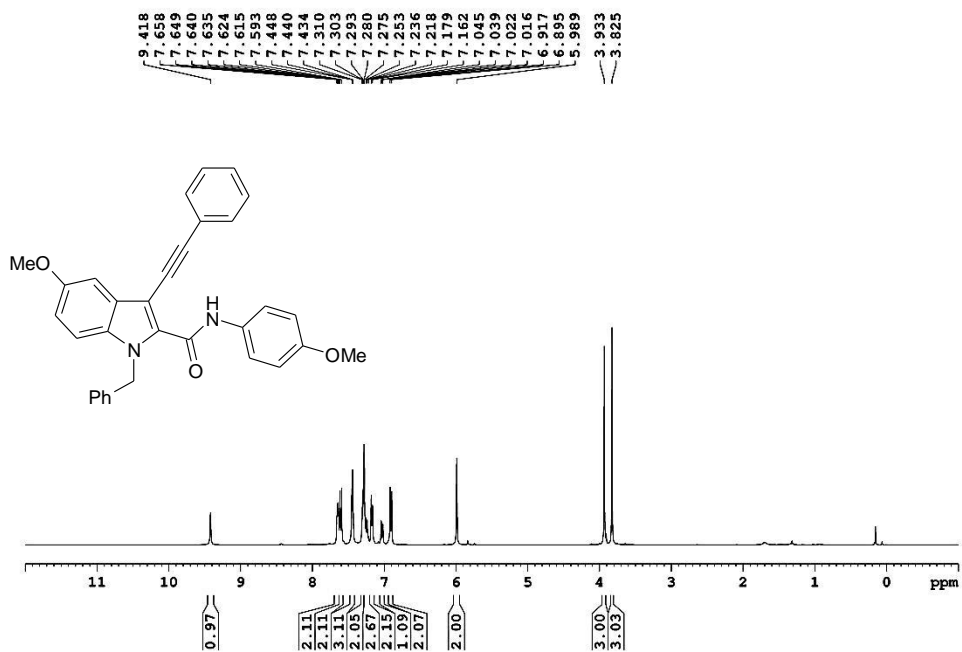

Figure S37.  $^1\text{H}$  NMR spectrum of compound **8e**

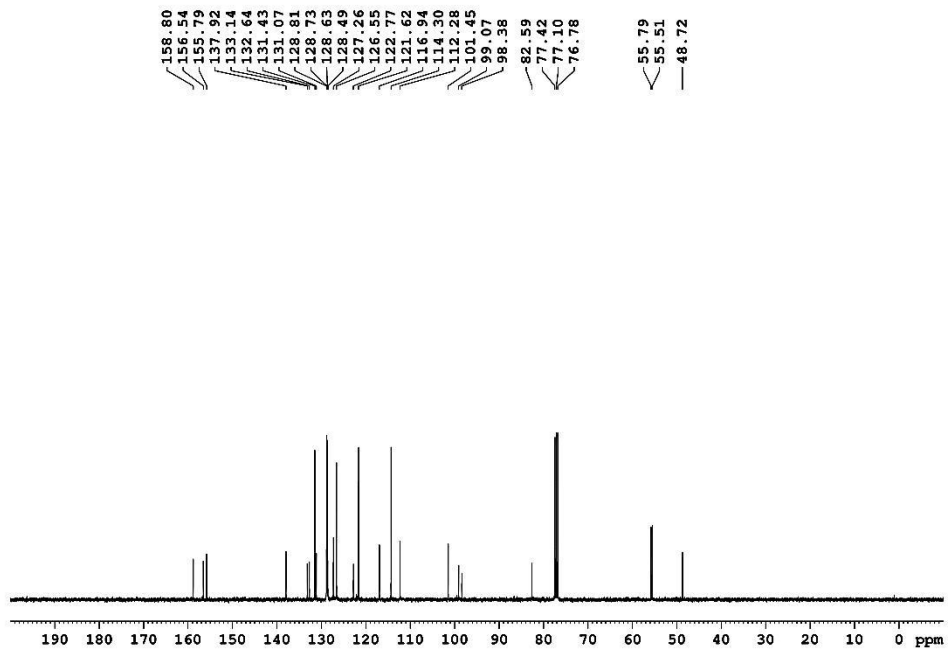

Figure S38.  $^{13}\text{C}$  NMR spectrum of compound **8e**

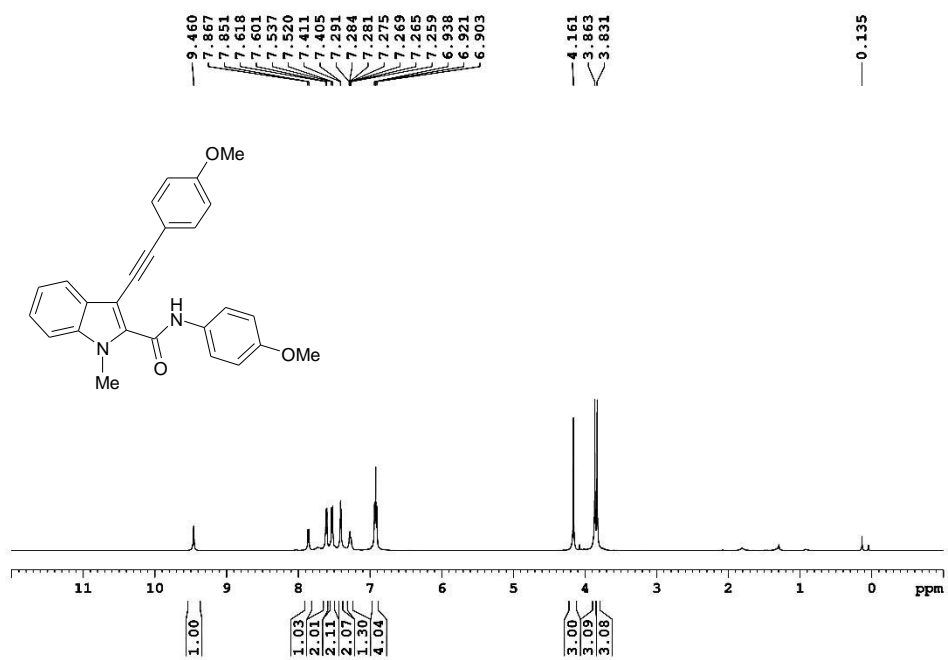

Figure S39. <sup>1</sup>H NMR spectrum of compound **8f**

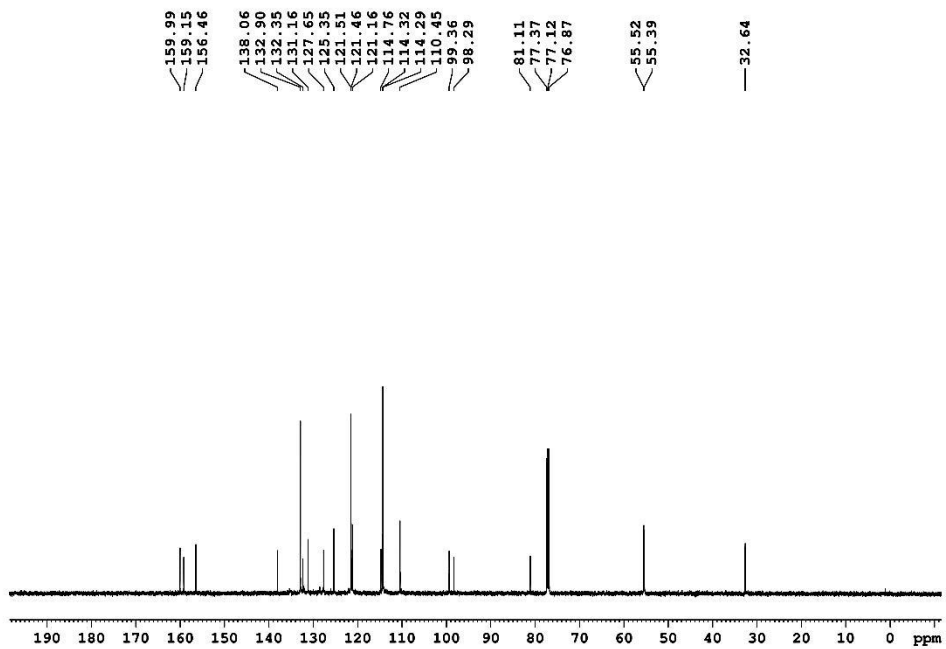

Figure S40. <sup>13</sup>C NMR spectrum of compound **8f**

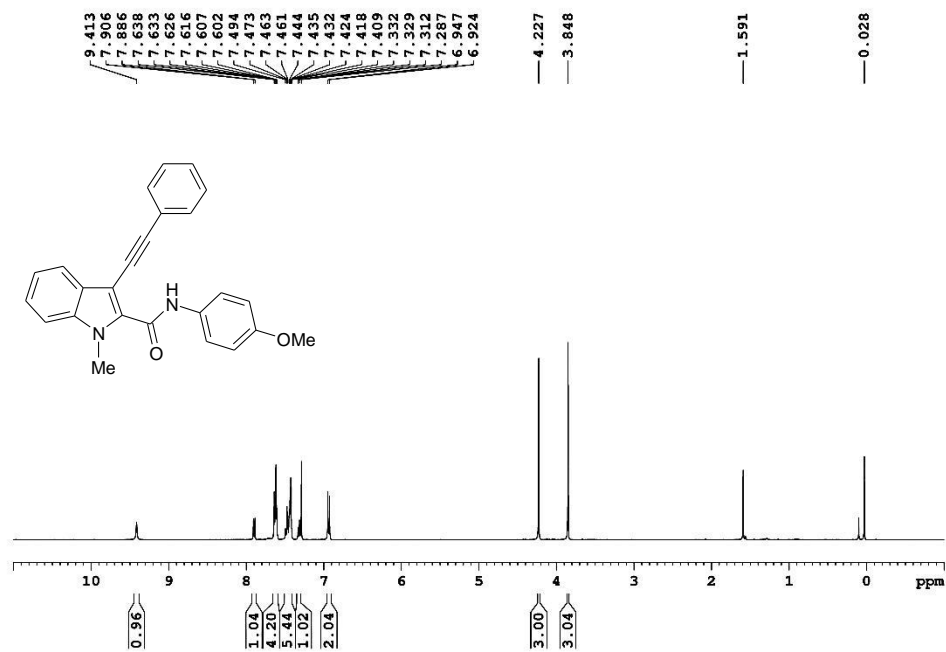

Figure S41. <sup>1</sup>H NMR spectrum of compound **8g**

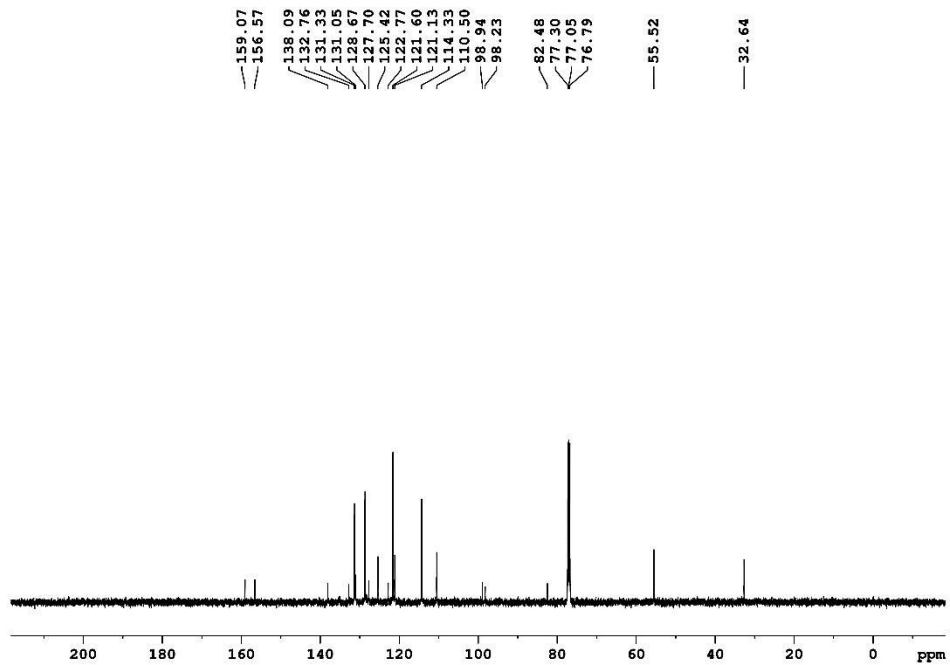

Figure S42. <sup>13</sup>C NMR spectrum of compound **8g**

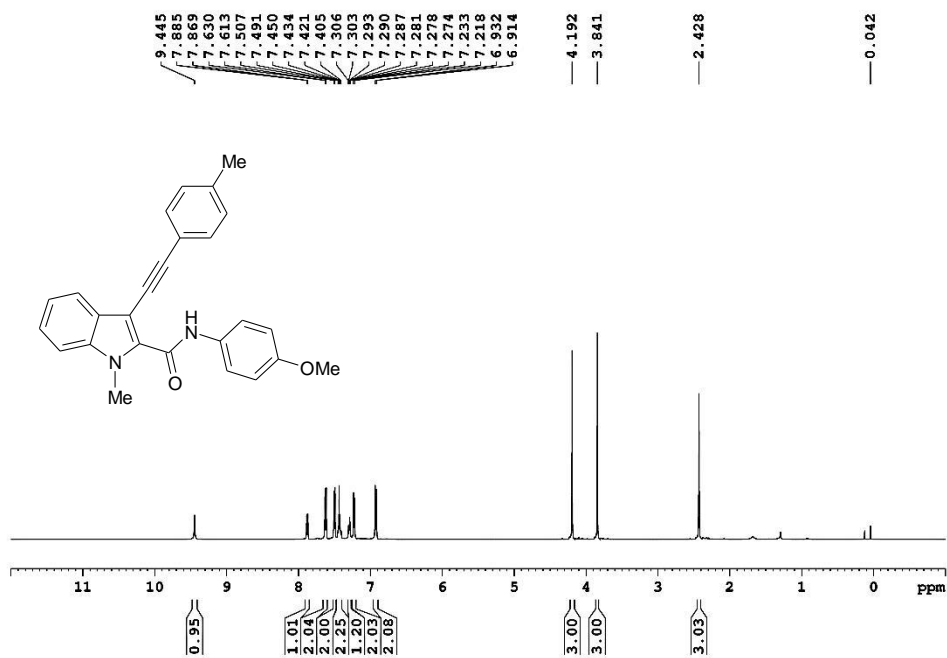

Figure S43. <sup>1</sup>H NMR spectrum of compound **8h**

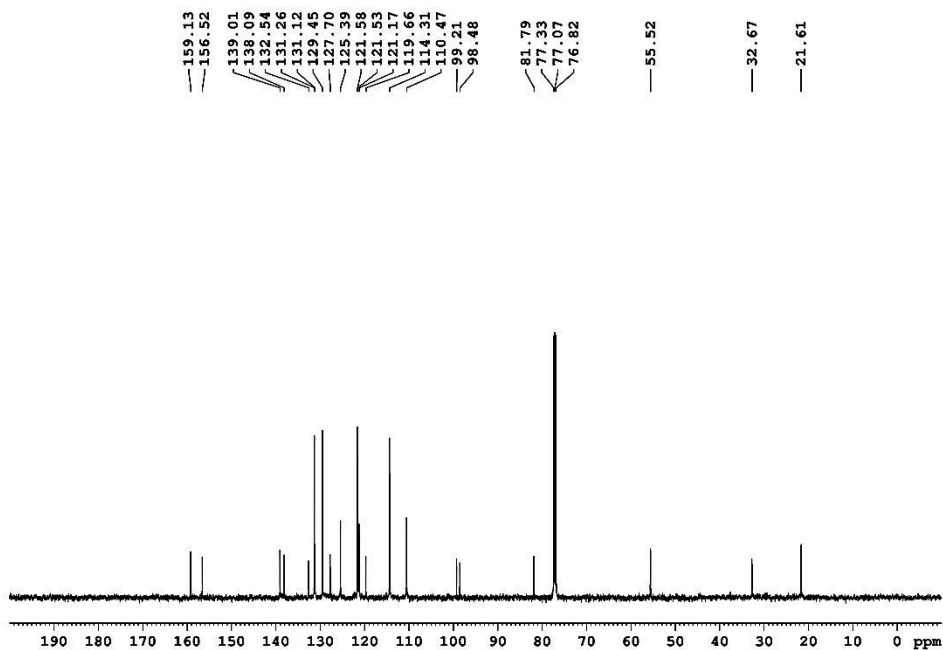

Figure S44. <sup>13</sup>C NMR spectrum of compound **8h**



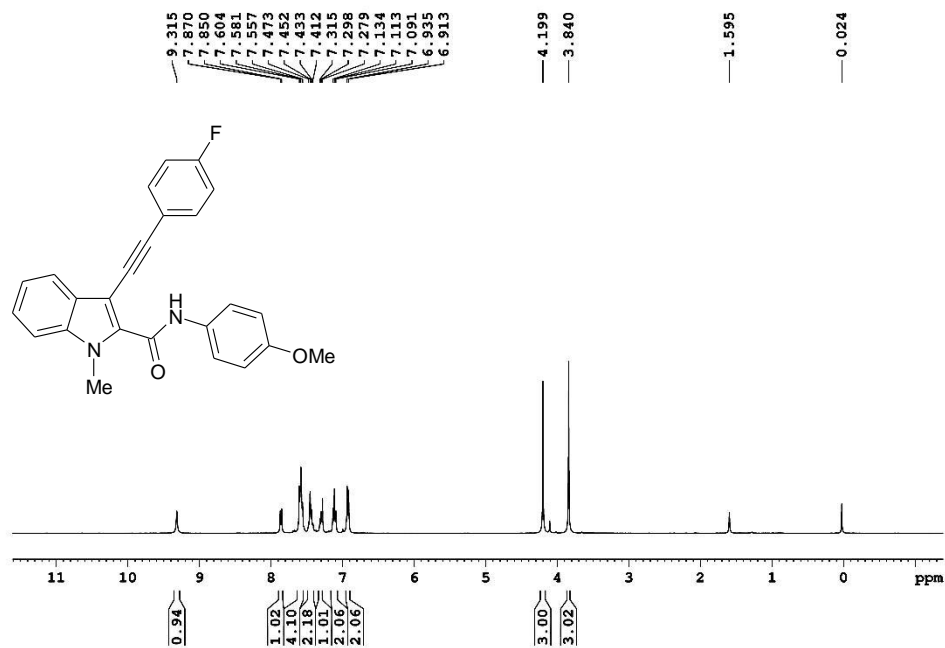

Figure S45. <sup>1</sup>H NMR spectrum of compound **8i**

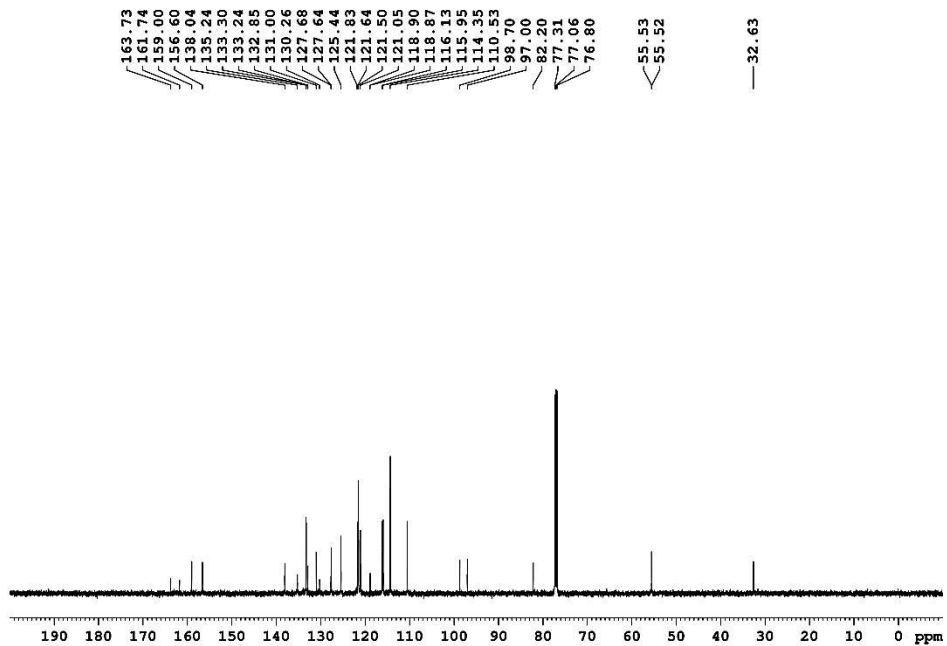

Figure S46. <sup>13</sup>C NMR spectrum of compound **8i**

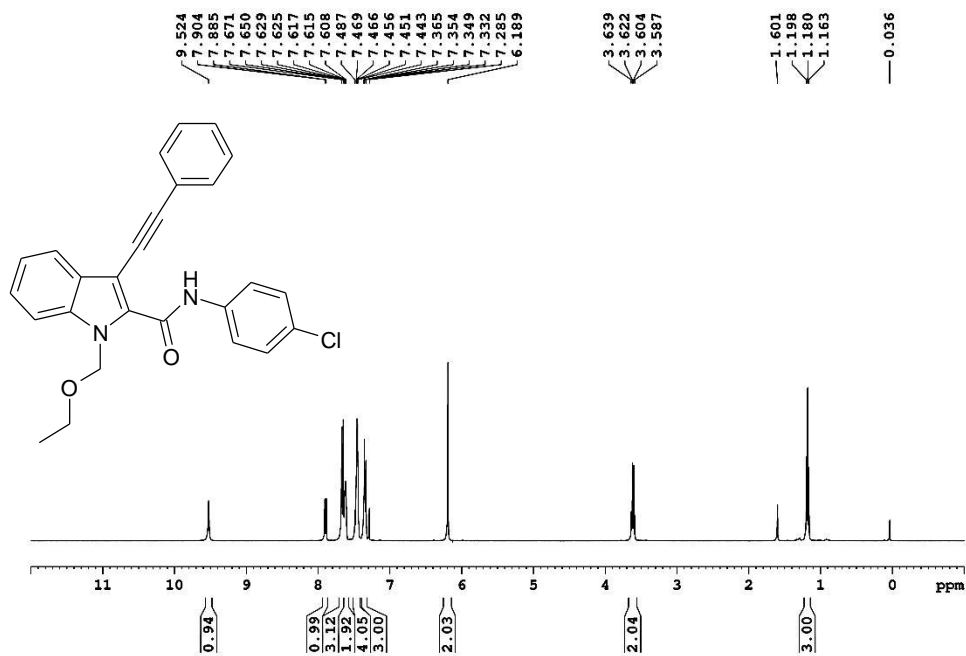

Figure S47.  $^1\text{H}$  NMR spectrum of compound **8j**

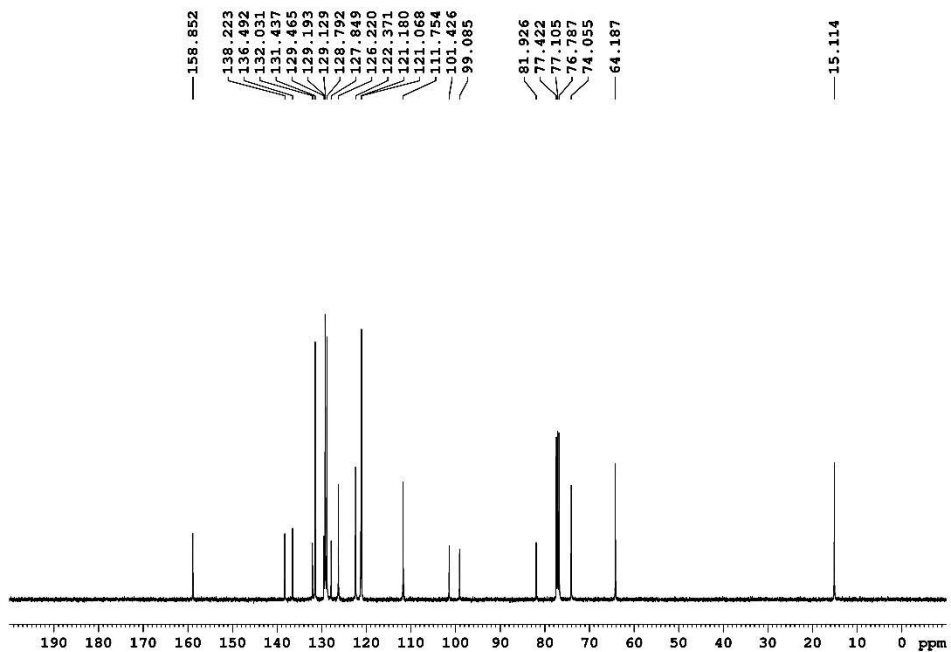

Figure S48.  $^{13}\text{C}$  NMR spectrum of compound **8j**

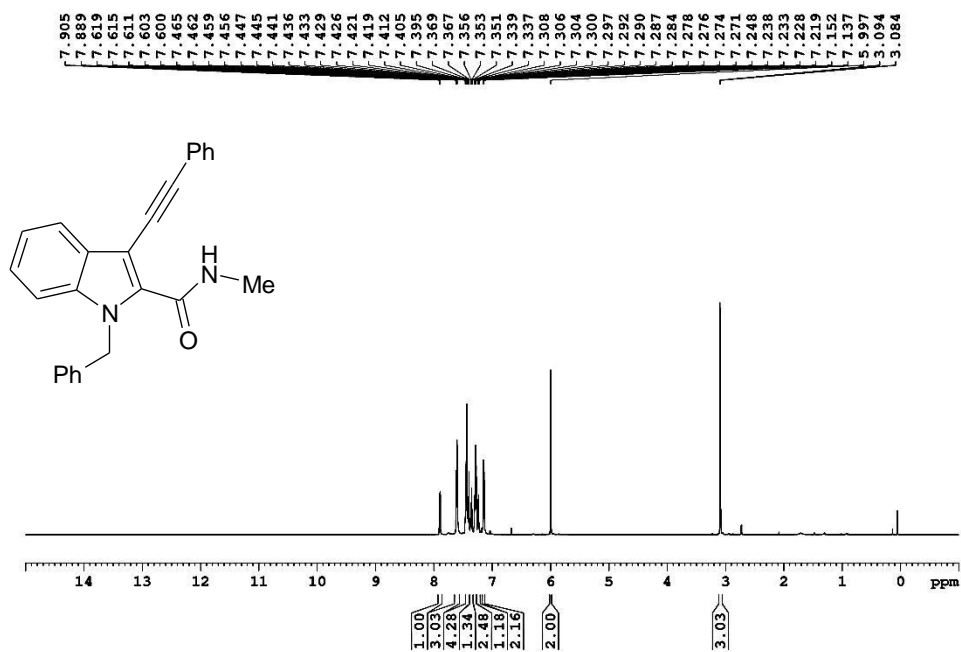

Figure S49. <sup>1</sup>H NMR spectrum of compound **8k**

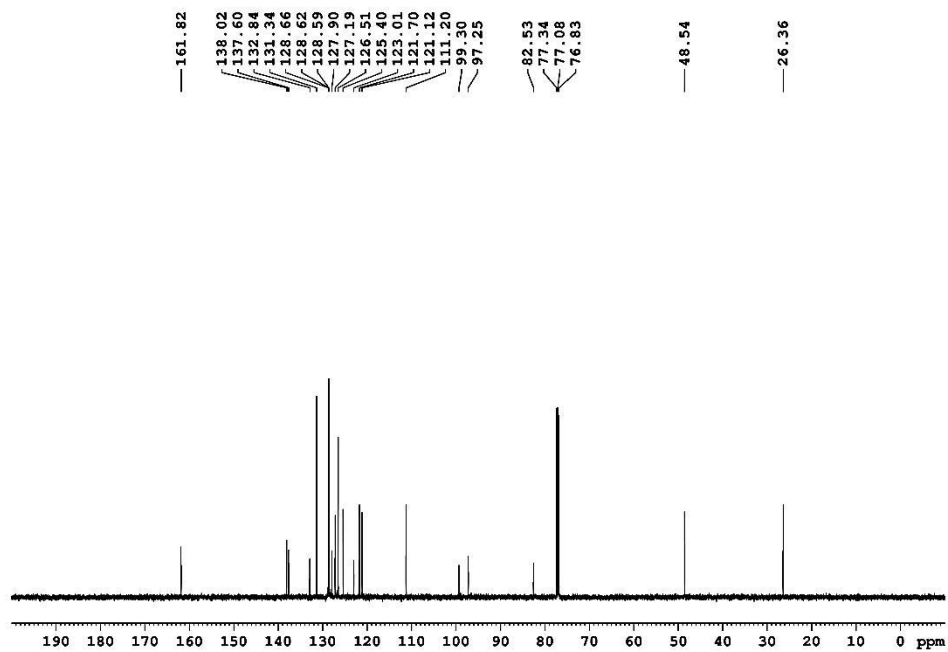

Figure S50. <sup>13</sup>C NMR spectrum of compound **8k**

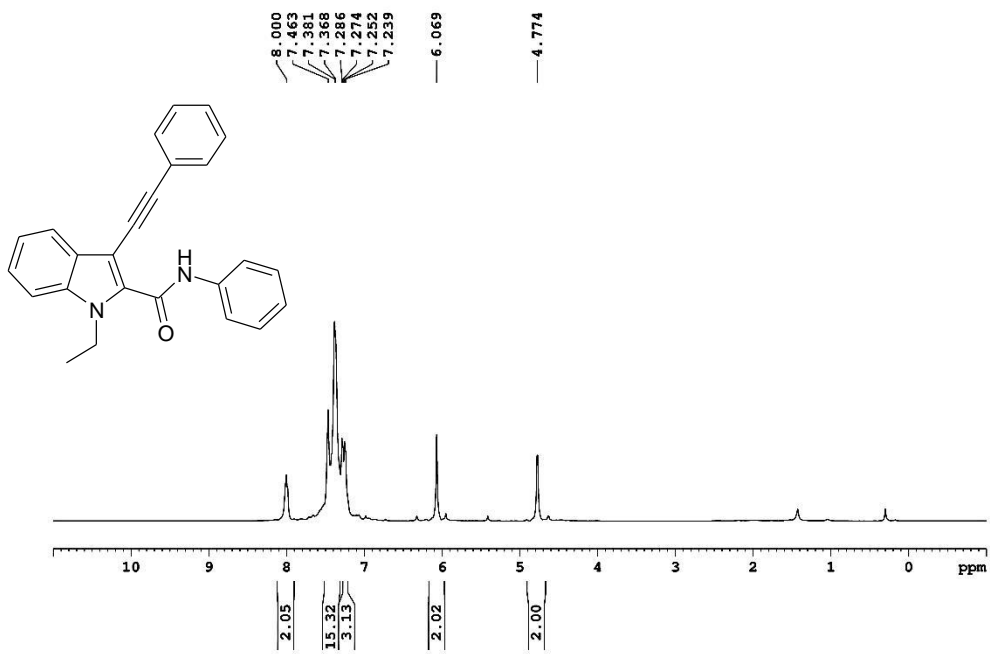

Figure S51. <sup>1</sup>H NMR spectrum of compound **81**

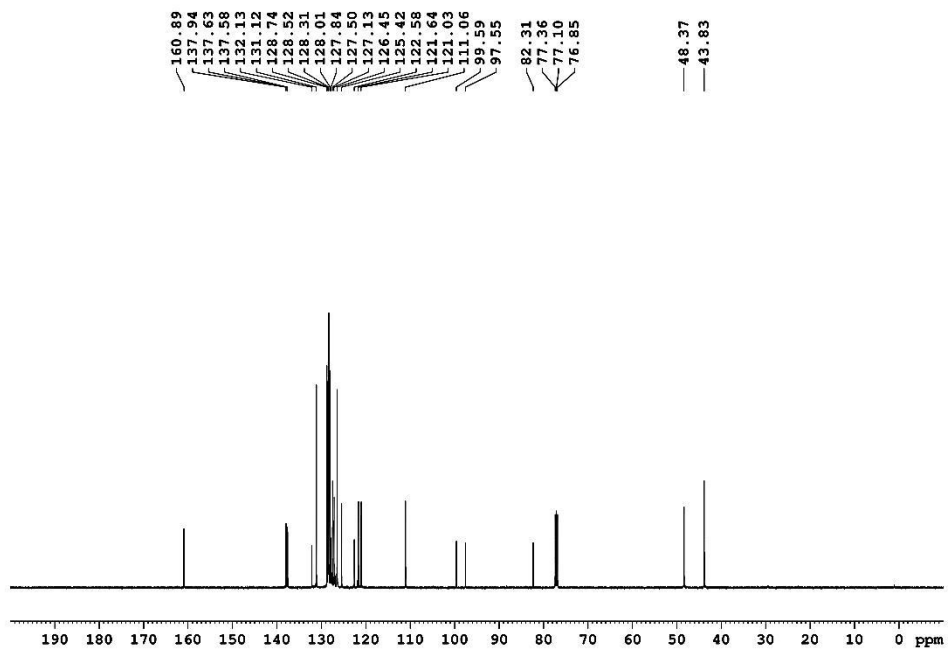

Figure S52. <sup>13</sup>C NMR spectrum of compound **81**

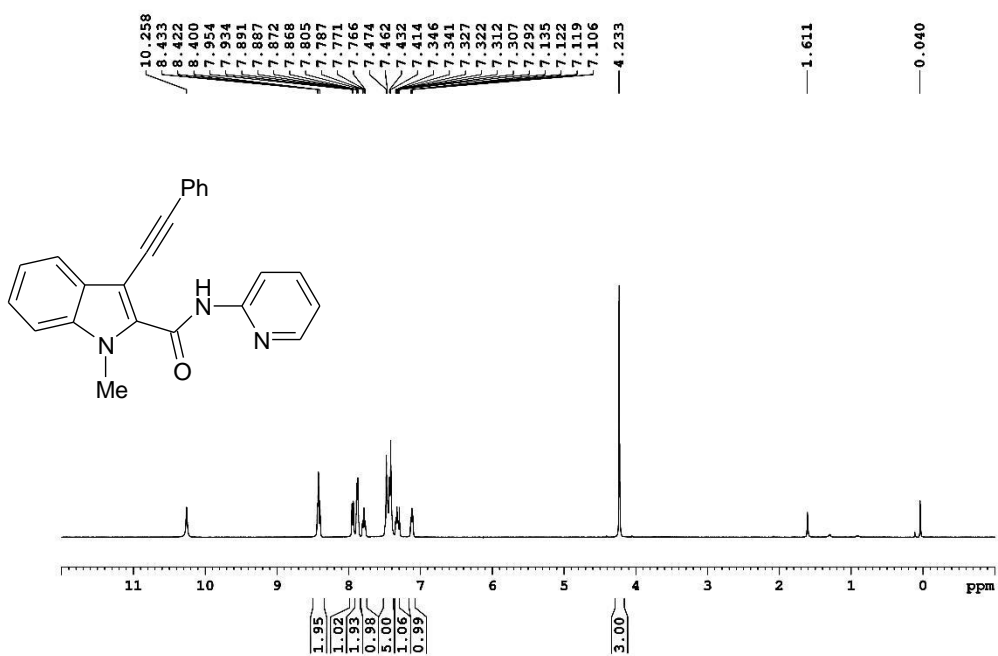

Figure S53. <sup>1</sup>H NMR spectrum of compound **8m**

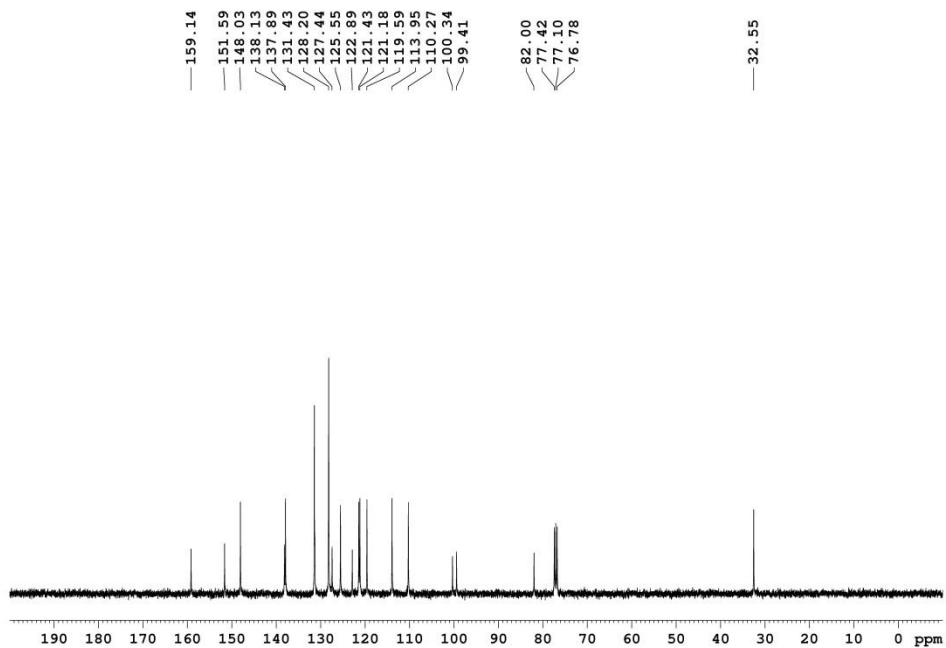

Figure S54. <sup>13</sup>C NMR spectrum of compound **8m**

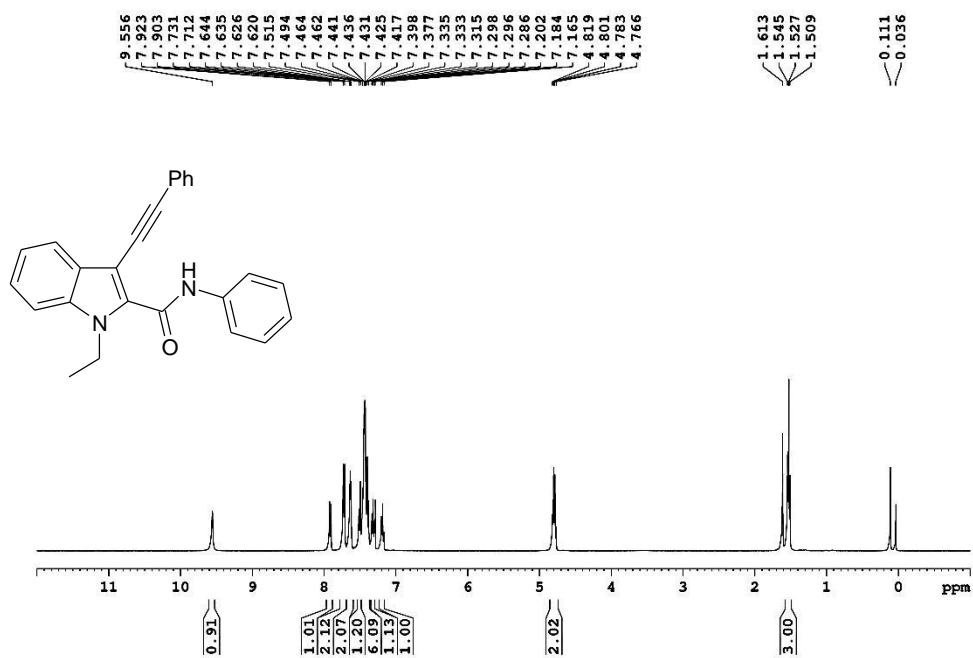

Figure S55. <sup>1</sup>H NMR spectrum of compound **8n**

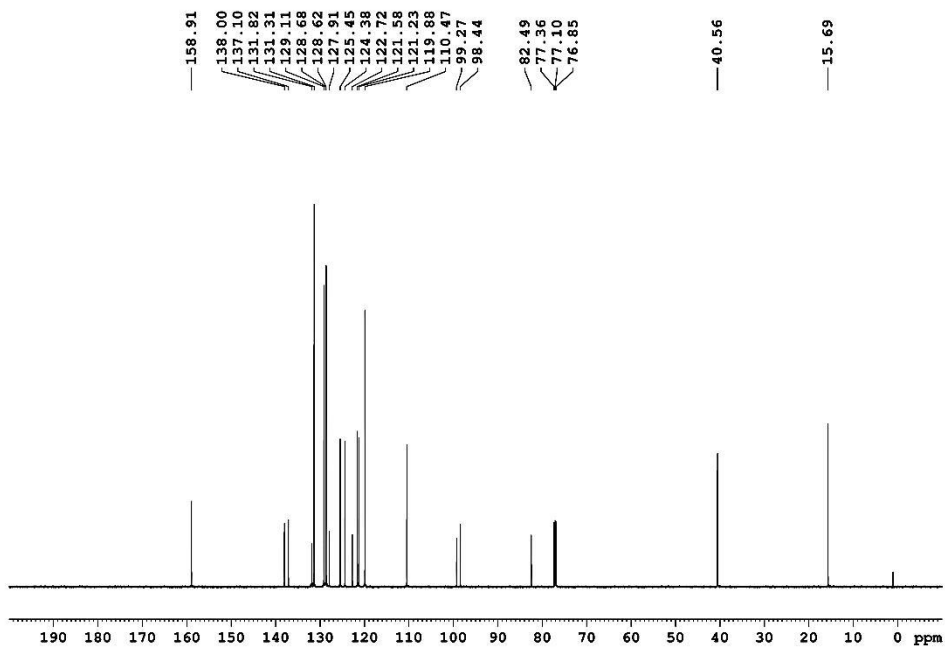

Figure S56. <sup>13</sup>C NMR spectrum of compound **8n**

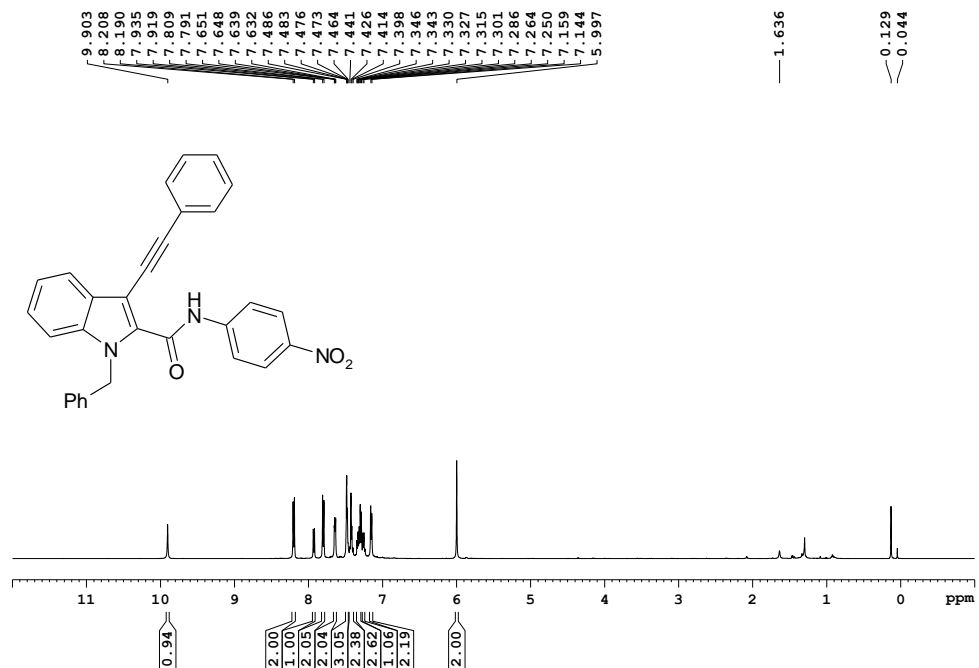

Figure S57. <sup>1</sup>H NMR spectrum of compound **8o**

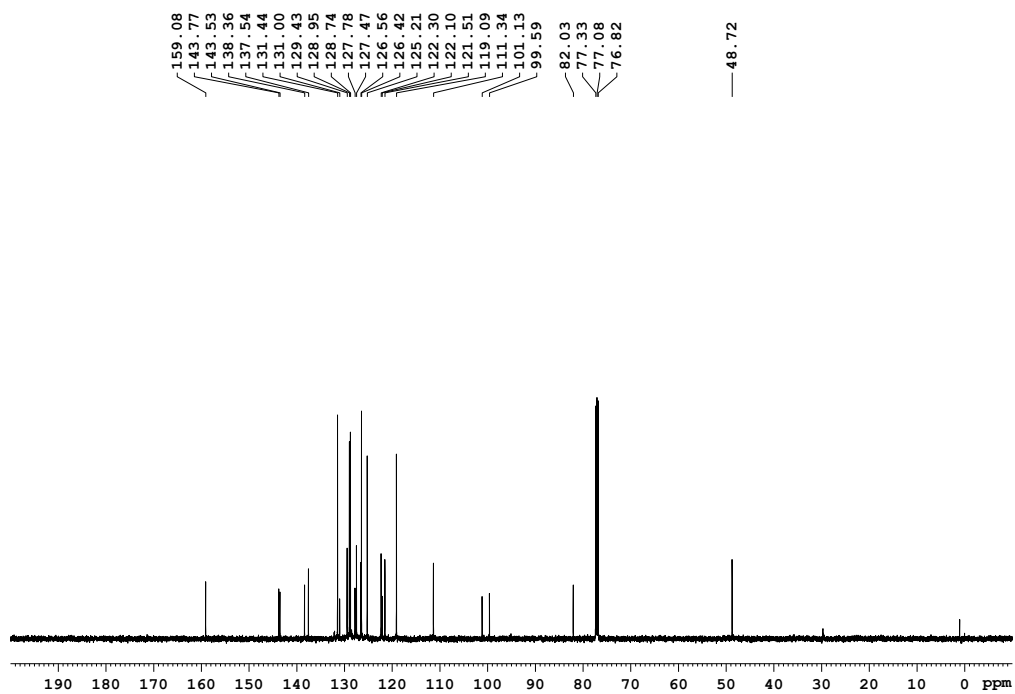

Figure S58. <sup>13</sup>C NMR spectrum of compound **8o**

(2) Copies of  $^1\text{H}/^{13}\text{C}$  NMR spectra for pyrrolo diindolones 9a-j and  $\beta$ -Carbolinones 10a-o.

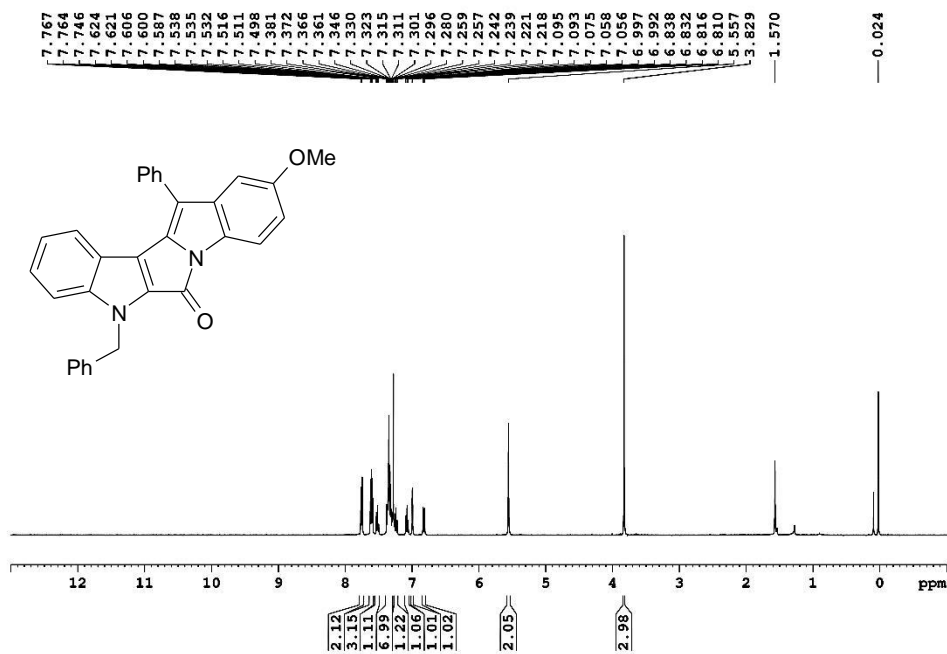

Figure S59.  $^1\text{H}$  NMR spectrum of compound 9a

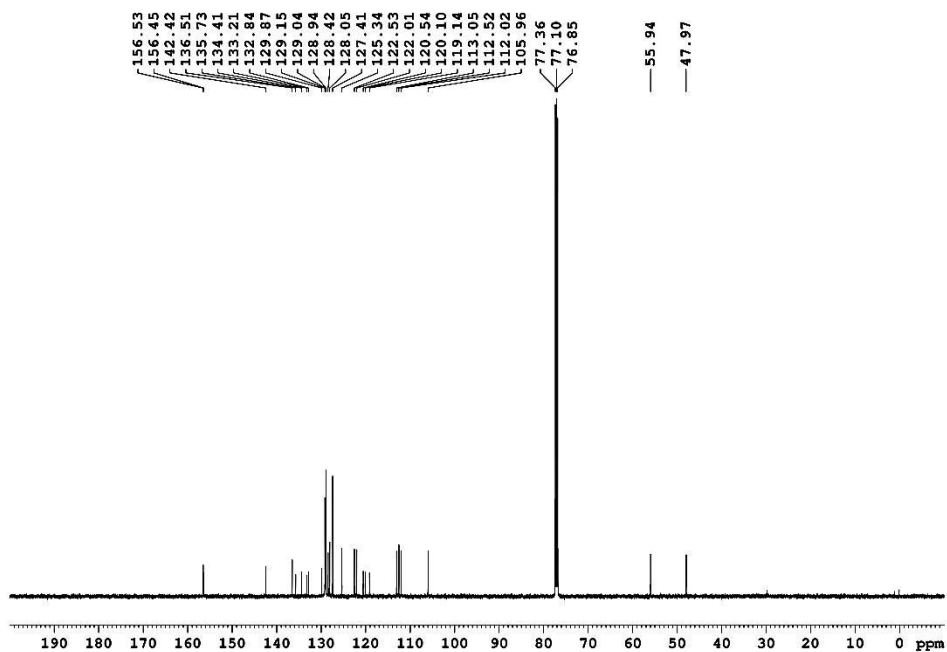

Figure S60.  $^{13}\text{C}$  NMR spectrum of compound 9a



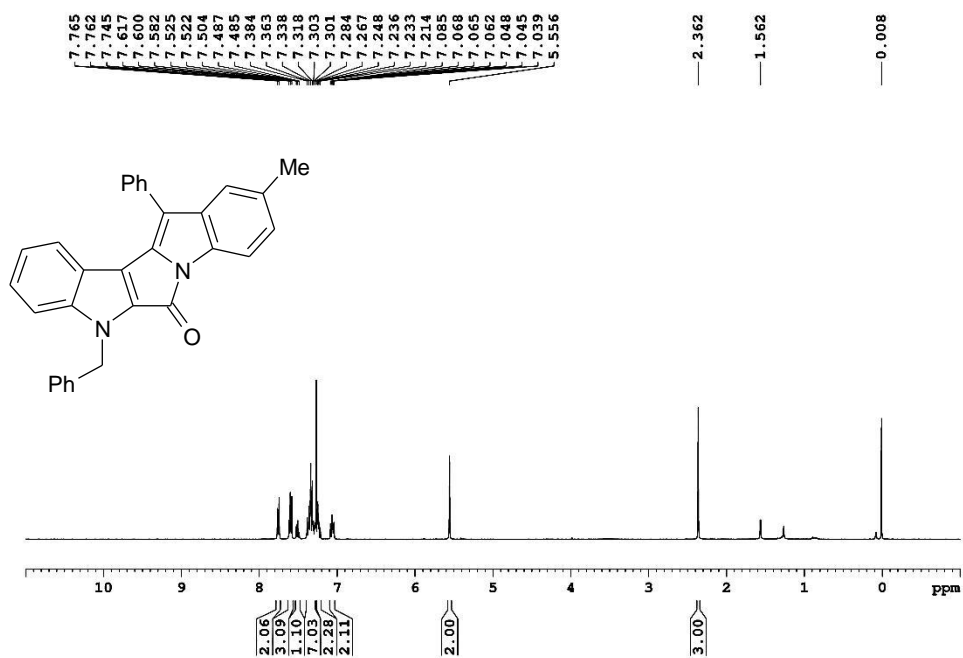

Figure S61. <sup>1</sup>H NMR spectrum of compound **9b**

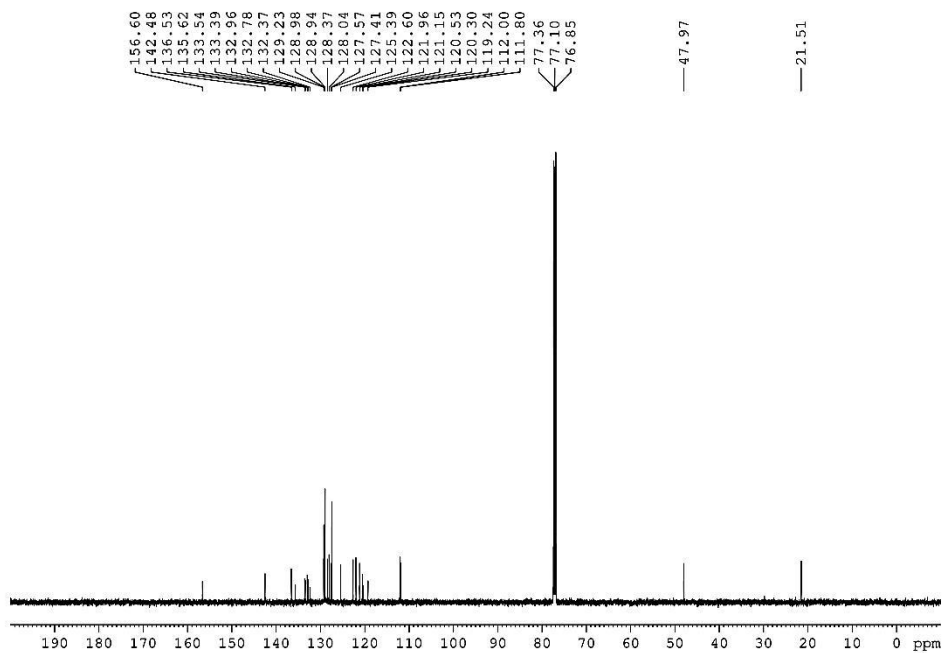

Figure S62. <sup>13</sup>C NMR spectrum of compound **9b**

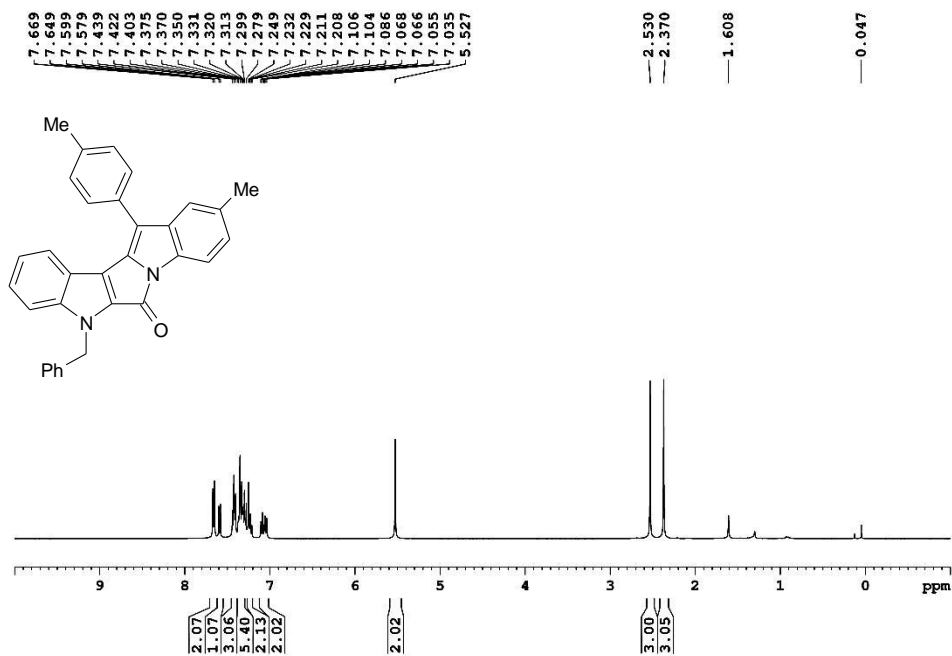

Figure S63.  $^1\text{H}$  NMR spectrum of compound **9c**

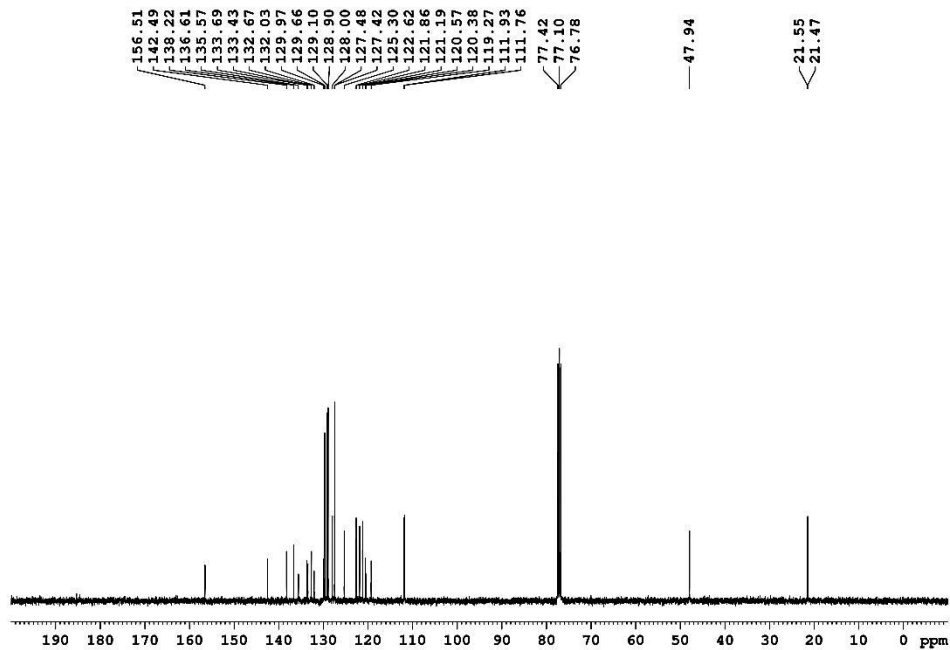

Figure S64.  $^{13}\text{C}$  NMR spectrum of compound **9c**

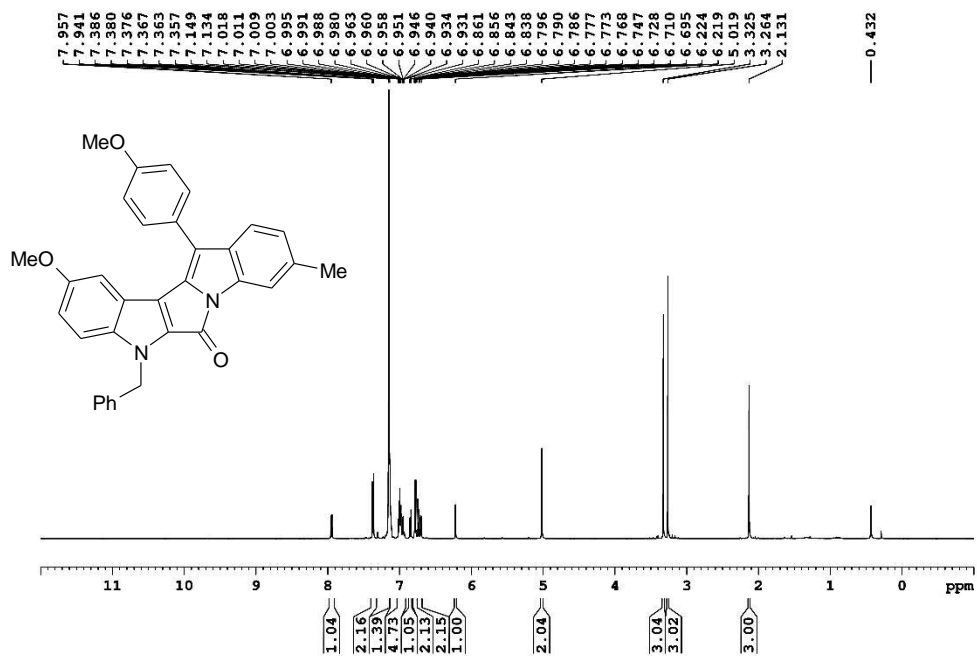

Figure S65. <sup>1</sup>H NMR spectrum of compound 9d

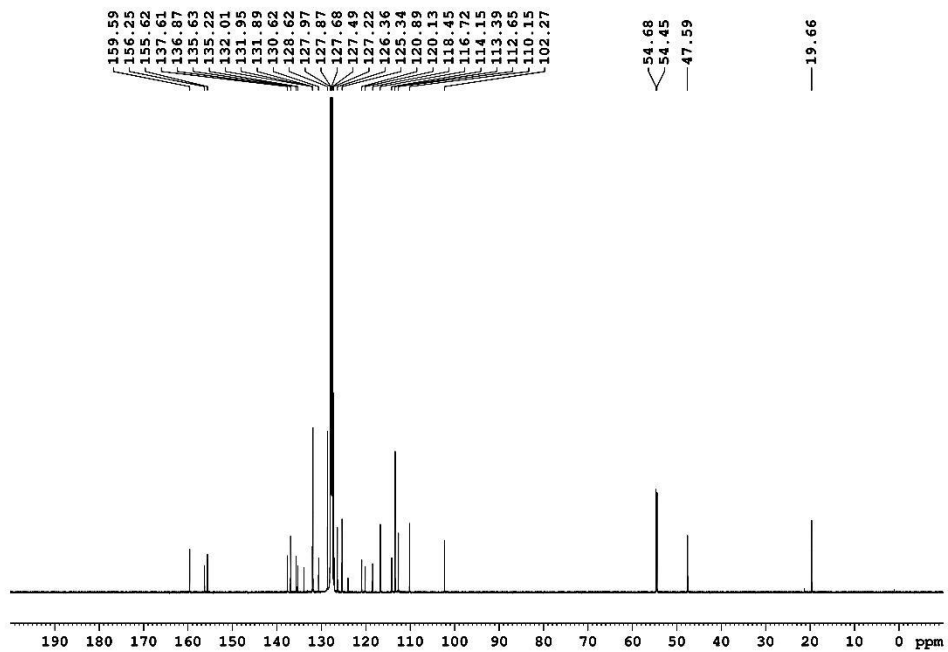

Figure S66. <sup>13</sup>C NMR spectrum of compound 9d

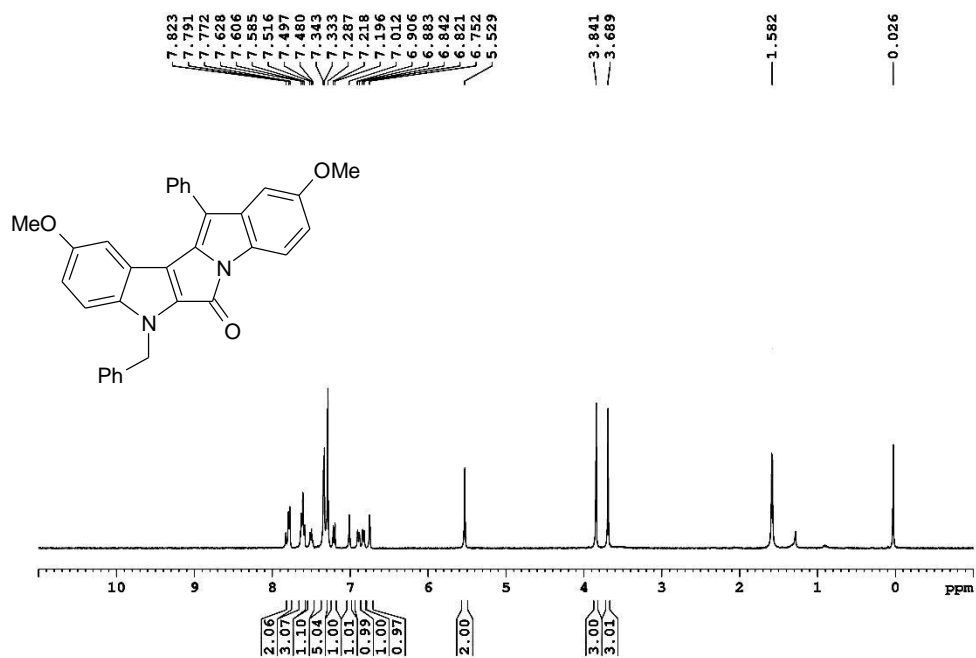

Figure S67.  $^1\text{H}$  NMR spectrum of compound **9e**

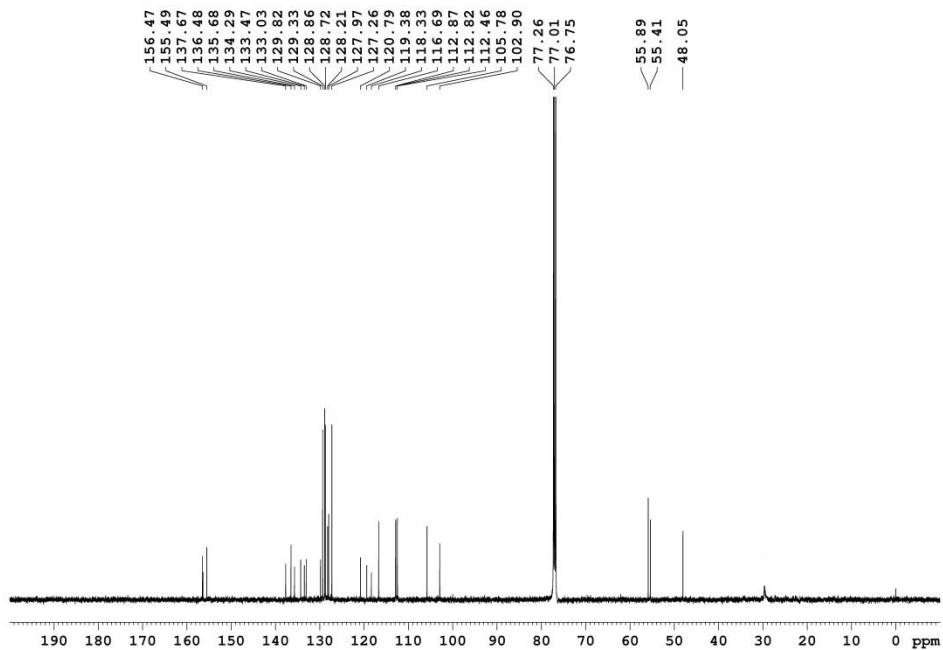

Figure S68.  $^{13}\text{C}$  NMR spectrum of compound **9e**

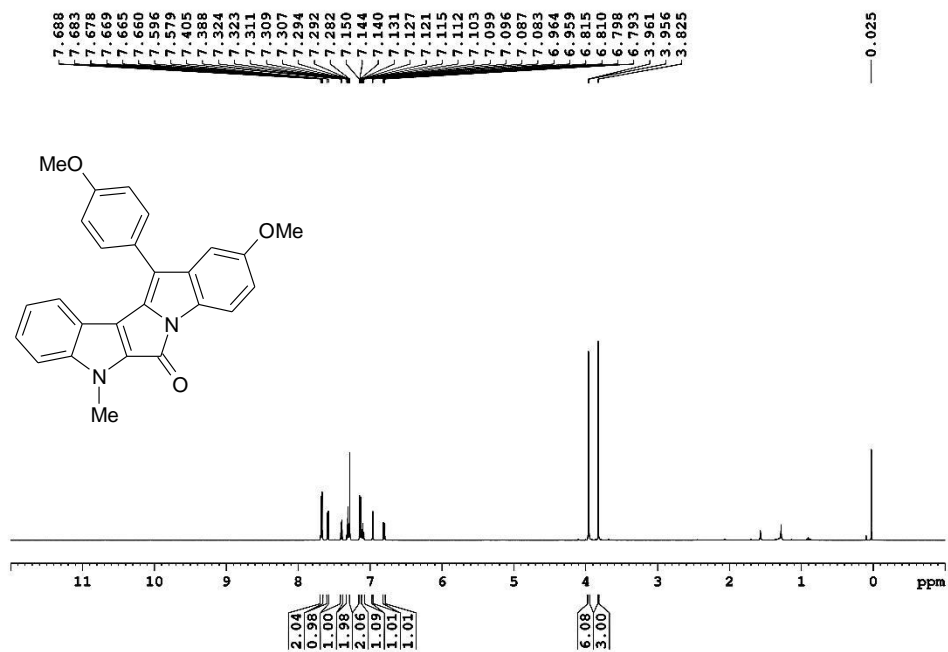

Figure S69.  $^1\text{H}$  NMR spectrum of compound **9f**

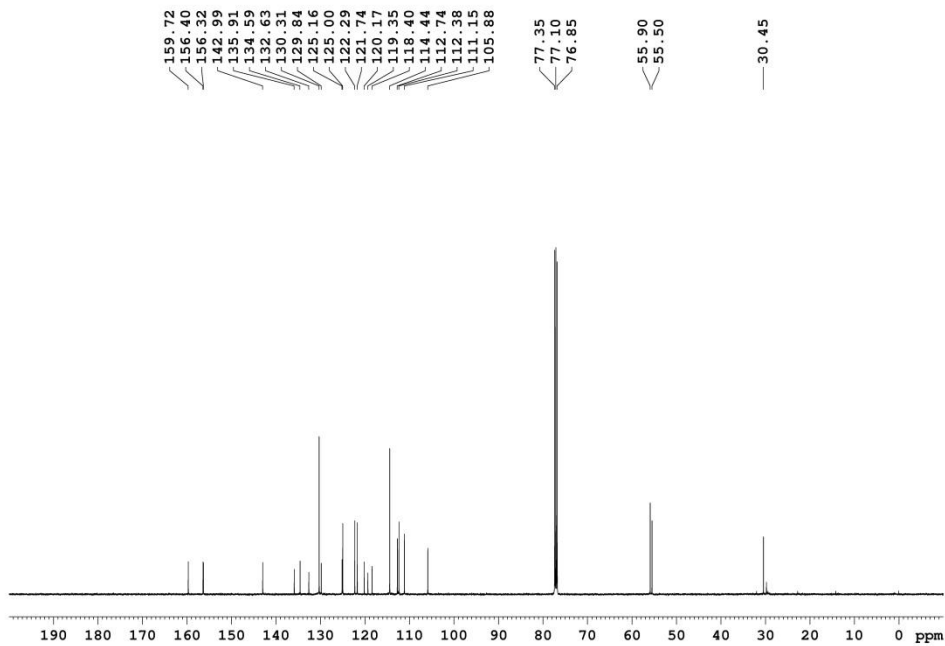

Figure S70.  $^{13}\text{C}$  NMR spectrum of compound **9f**

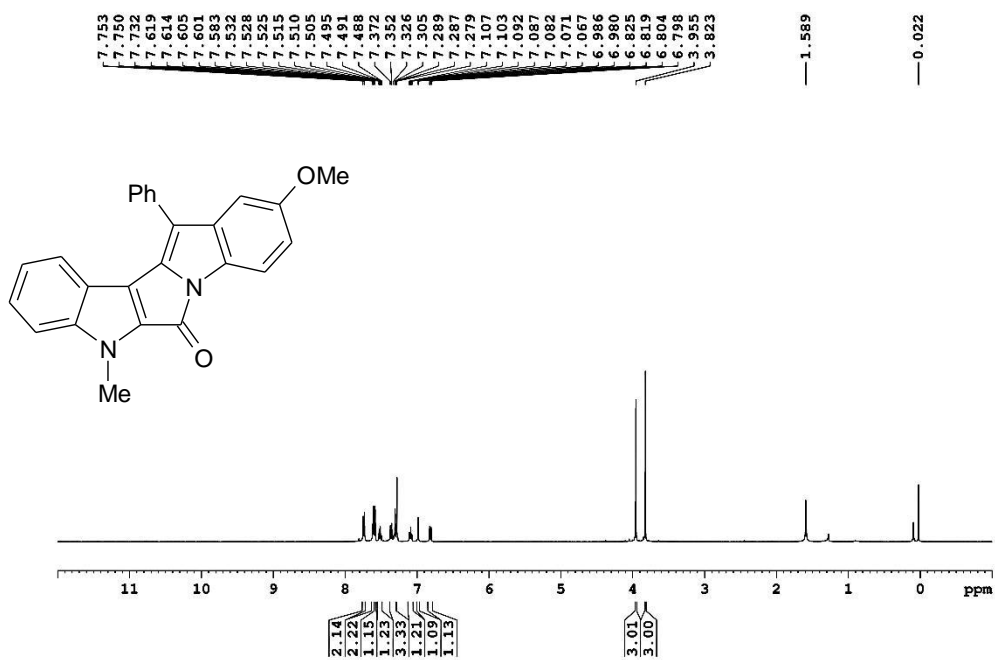

Figure S71. <sup>1</sup>H NMR spectrum of compound **9g**

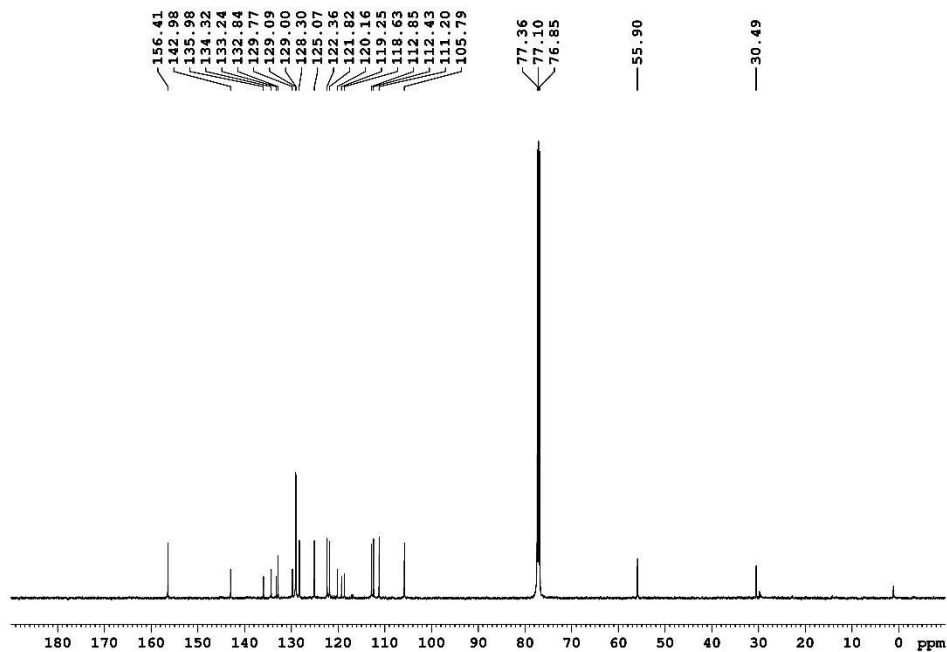

Figure S72. <sup>13</sup>C NMR spectrum of compound **9g**

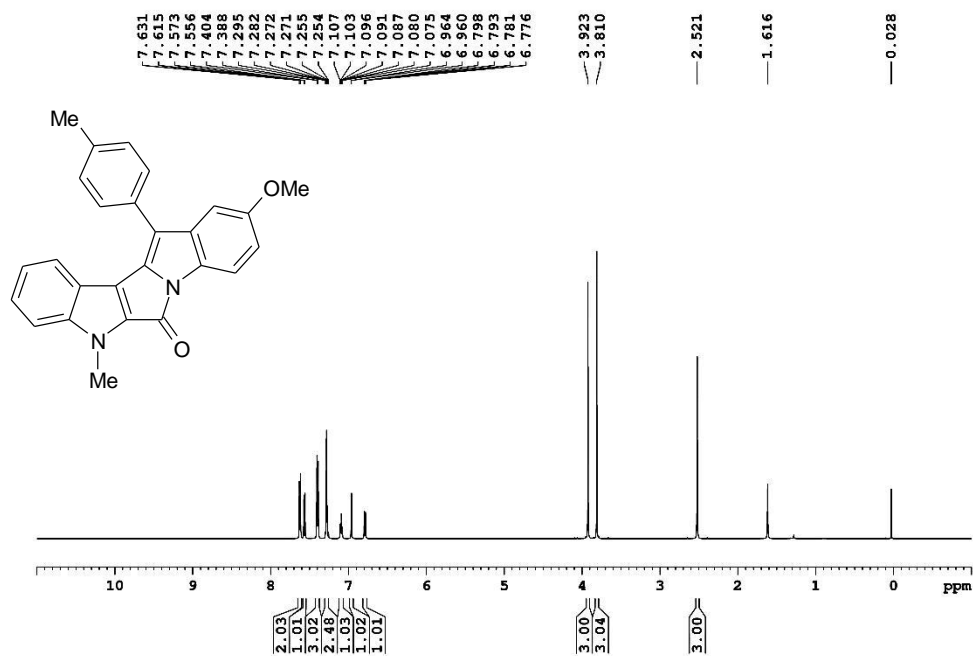

Figure S73. <sup>1</sup>H NMR spectrum of compound **9h**

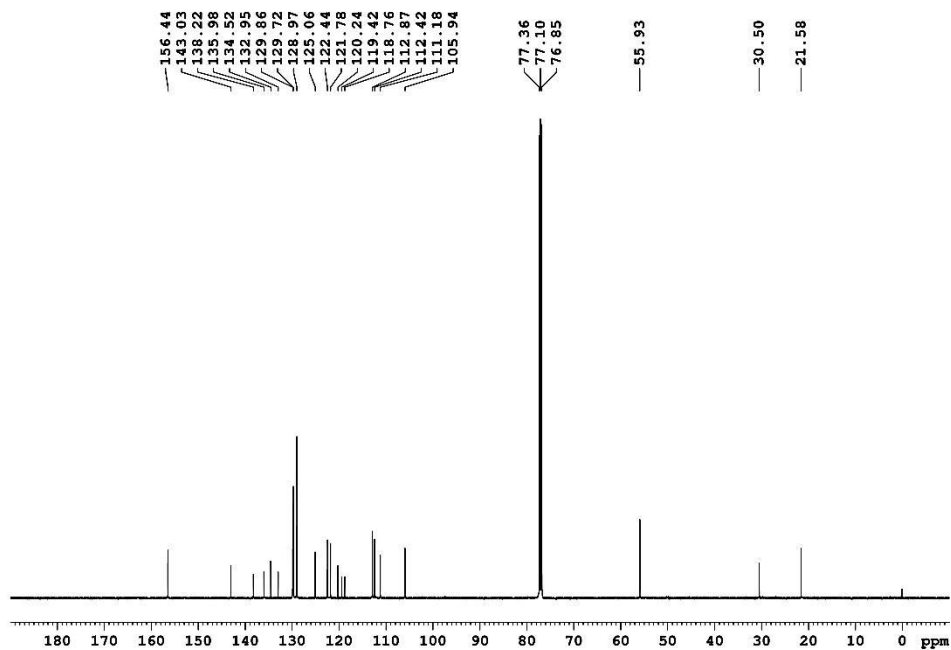

Figure S74. <sup>13</sup>C NMR spectrum of compound **9h**

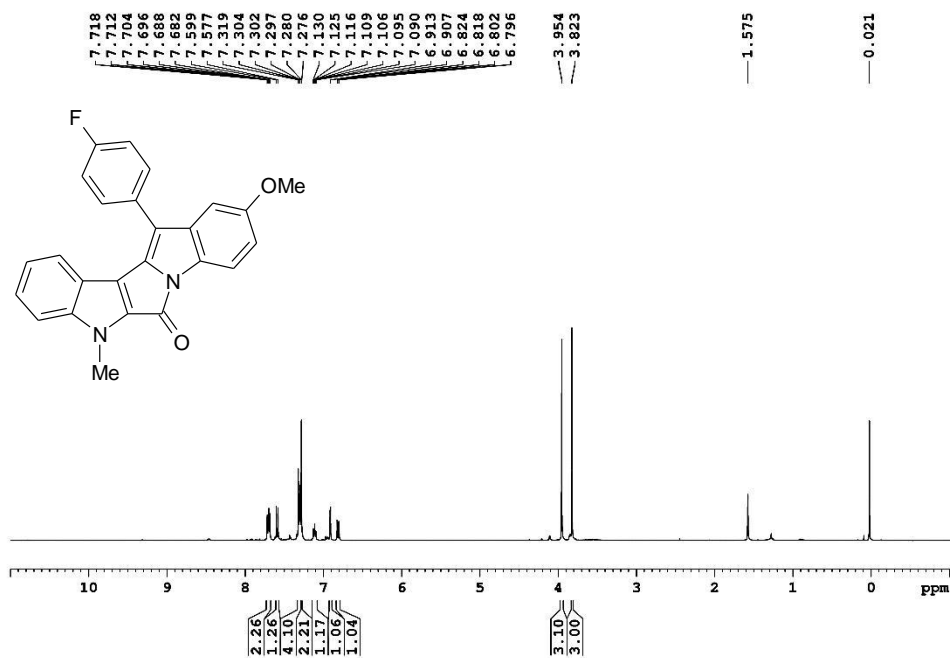

Figure S75. <sup>1</sup>H NMR spectrum of compound **9i**

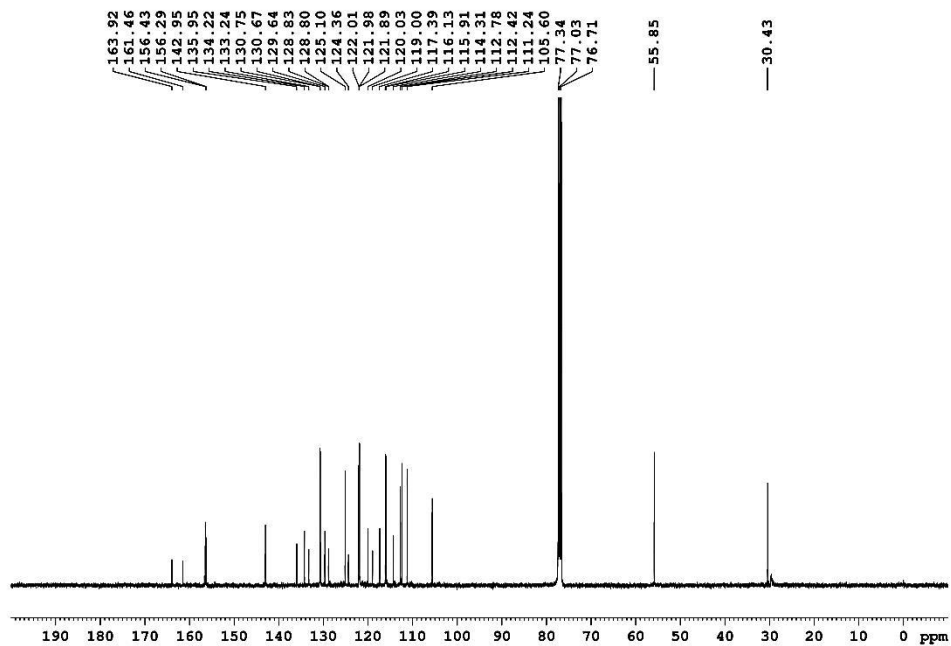

Figure S76. <sup>13</sup>C NMR spectrum of compound **9i**



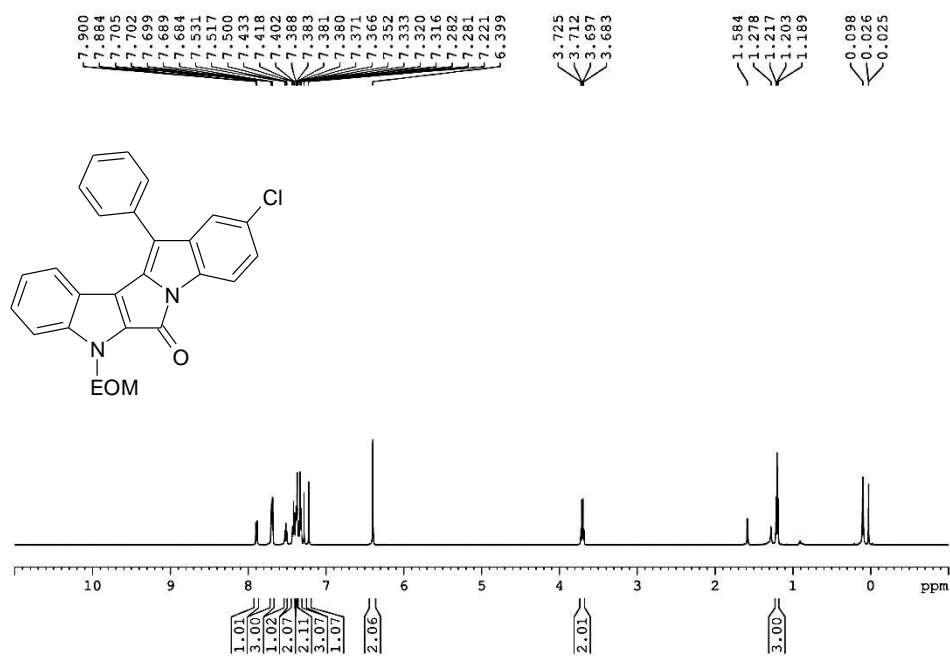

Figure S77.  $^1\text{H}$  NMR spectrum of compound **9j**

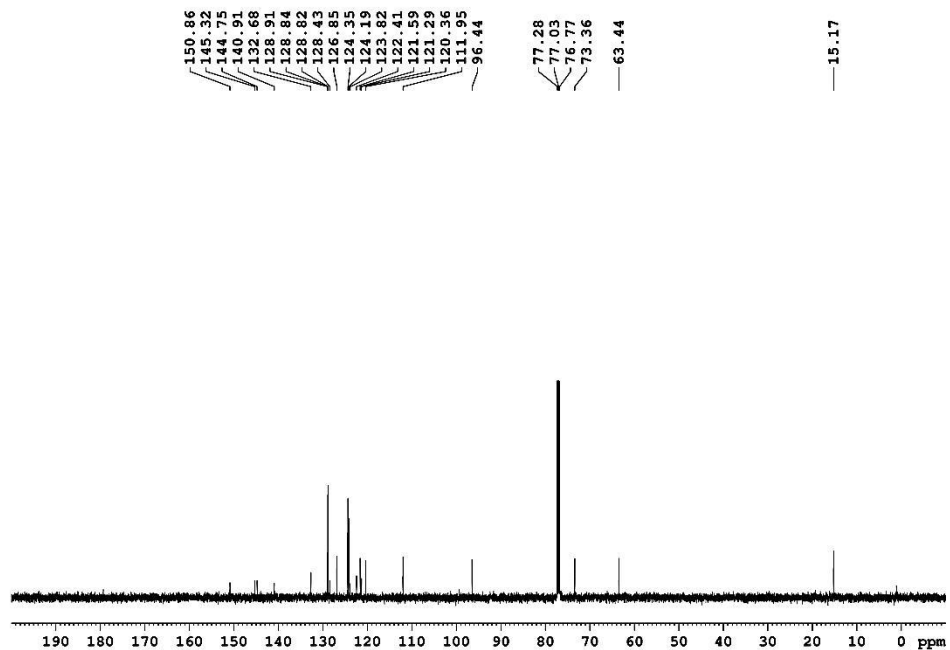

Figure S78.  $^{13}\text{C}$  NMR spectrum of compound **9j**

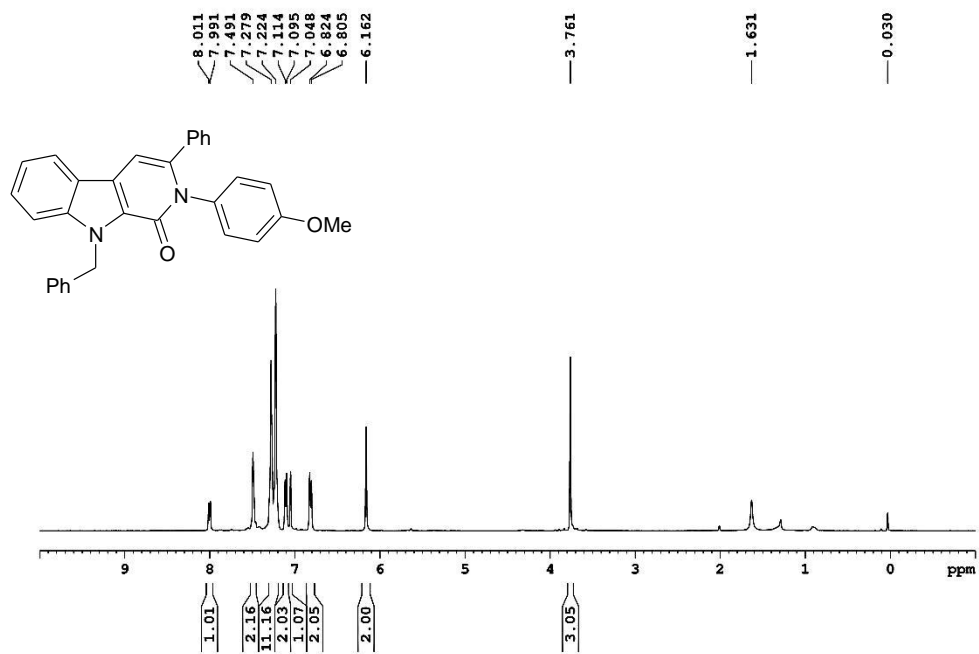

Figure S79. <sup>1</sup>H NMR spectrum of compound **10a**

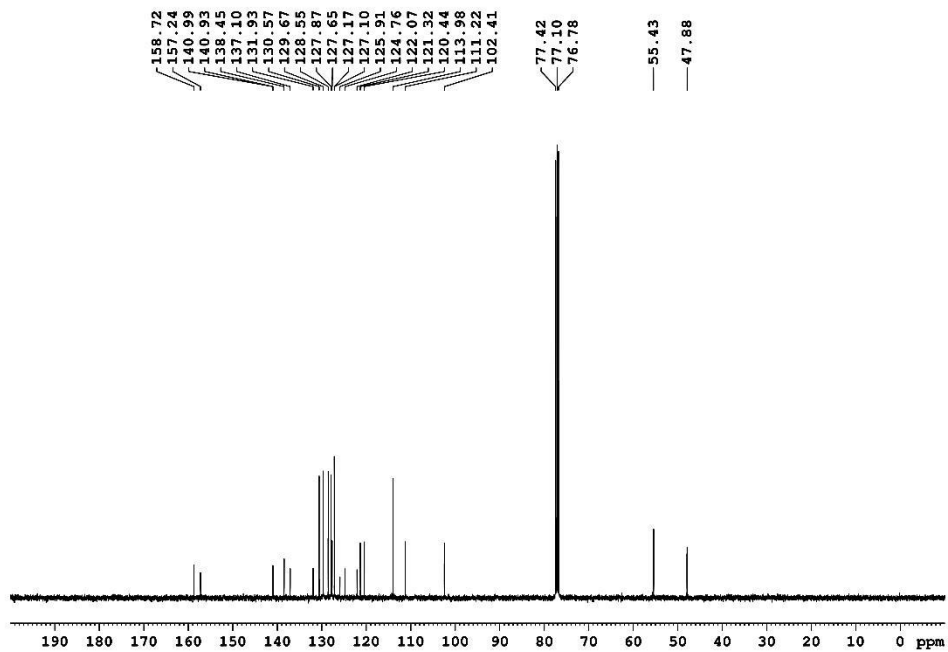

Figure S80. <sup>13</sup>C NMR spectrum of compound **10a**

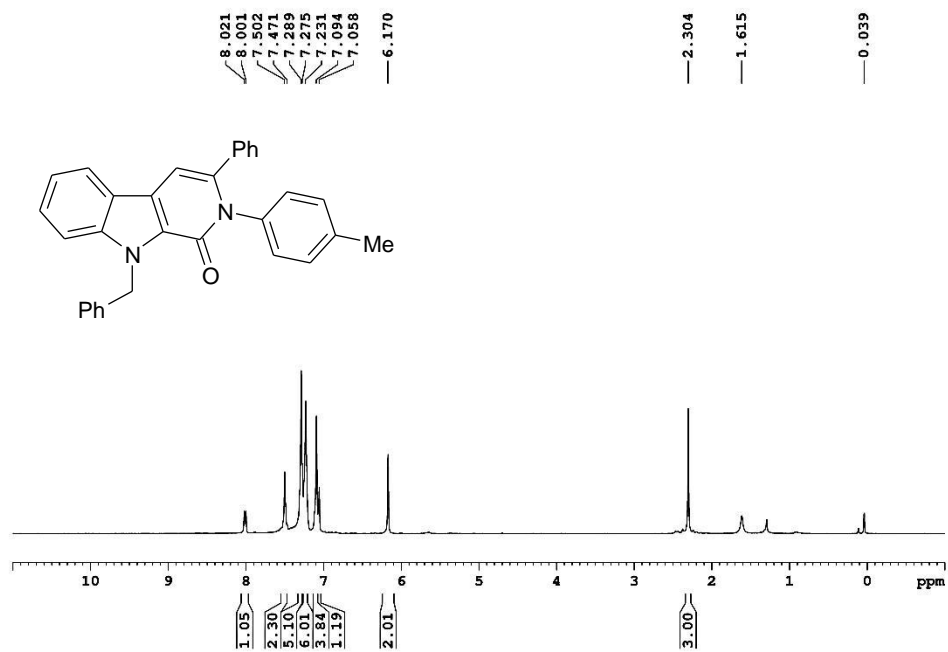

Figure S81. <sup>1</sup>H NMR spectrum of compound **10b**

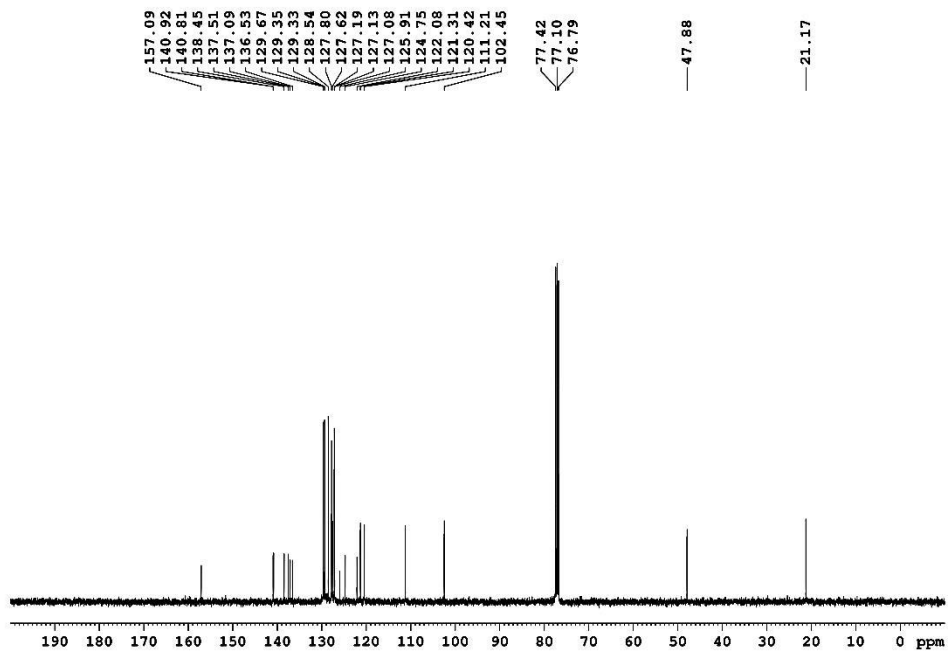

Figure S82. <sup>13</sup>C NMR spectrum of compound **10b**

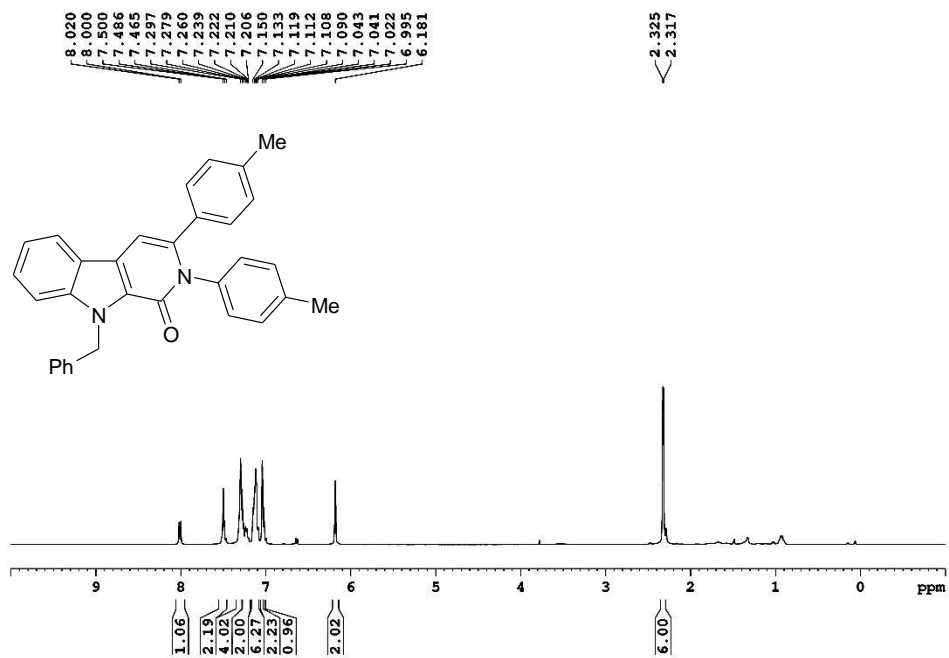

Figure S83. <sup>1</sup>H NMR spectrum of compound **10c**

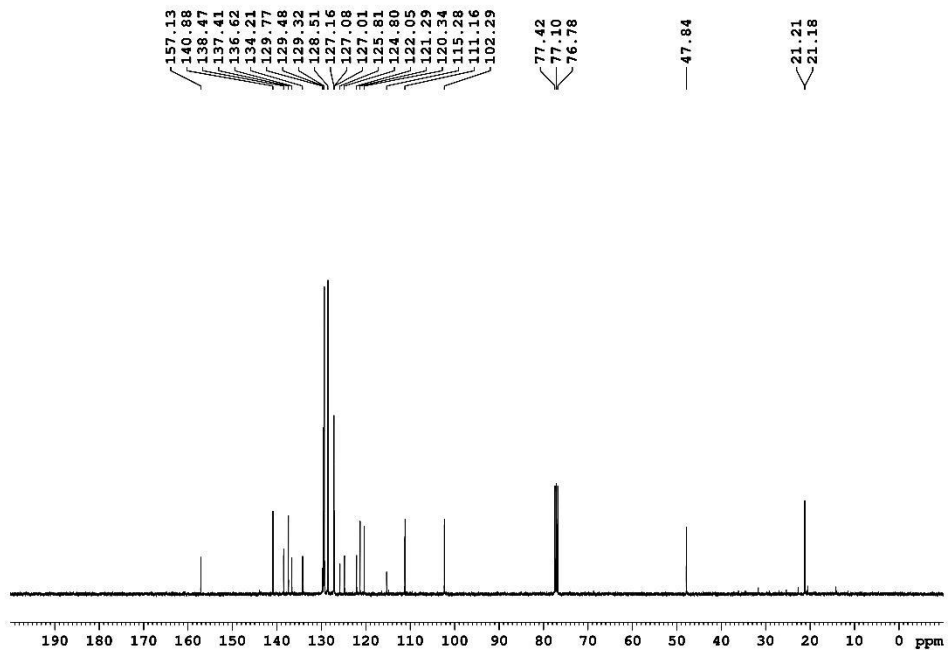

Figure S84. <sup>13</sup>C NMR spectrum of compound **10c**

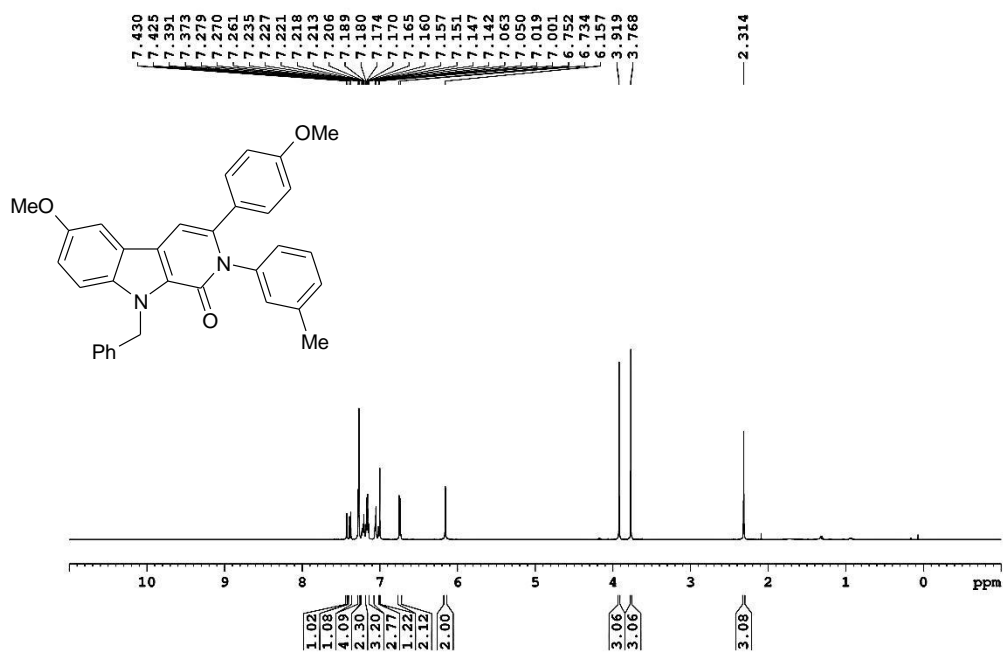

Figure S85. <sup>1</sup>H NMR spectrum of compound **10d**

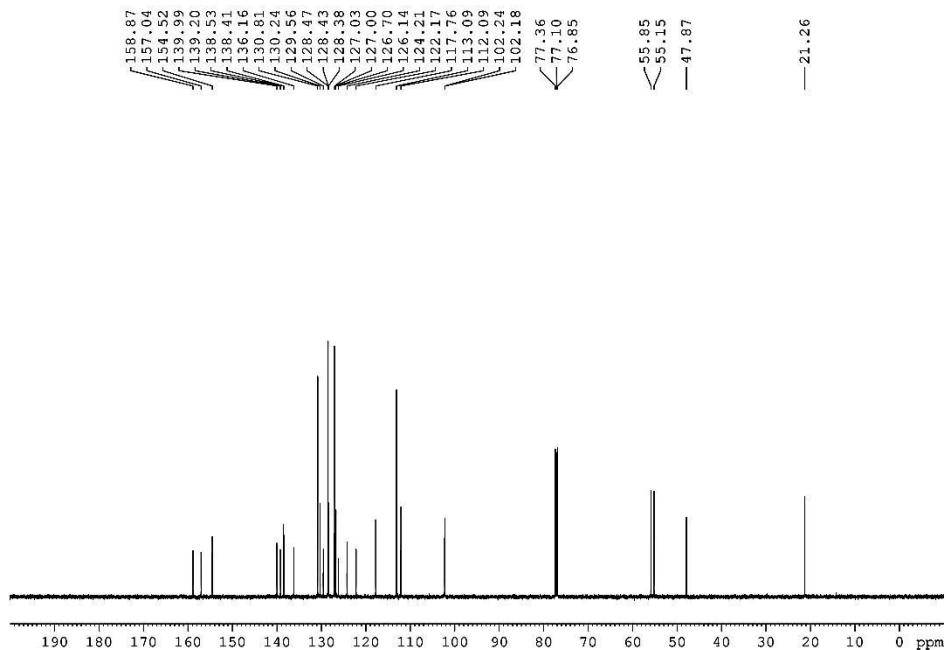

Figure S86. <sup>13</sup>C NMR spectrum of compound **10d**

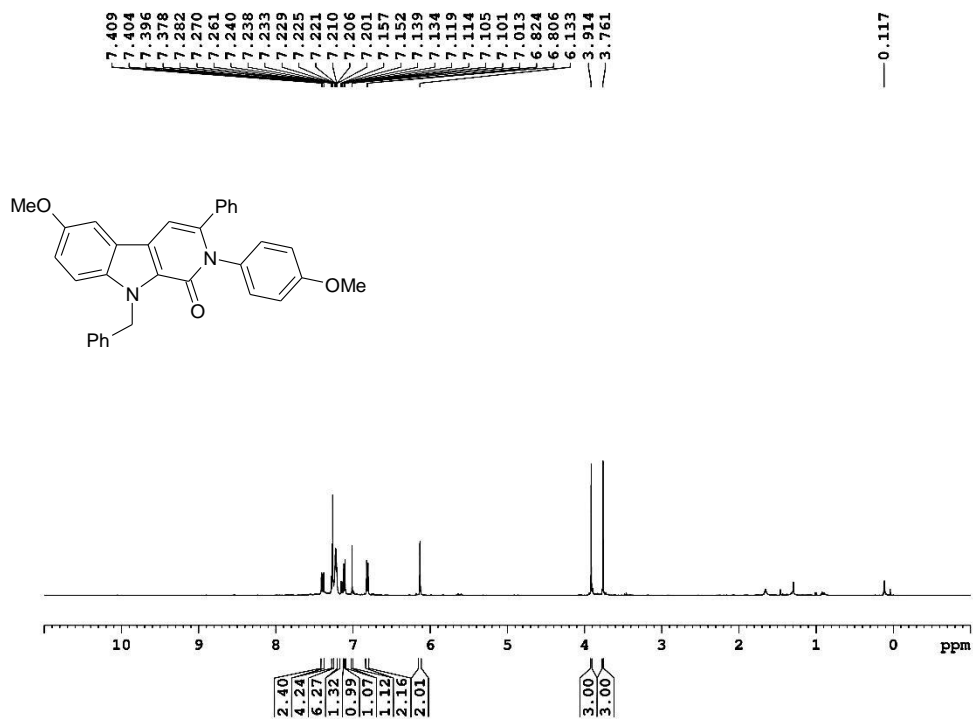

Figure S87.  $^1\text{H}$  NMR spectrum of compound 10e

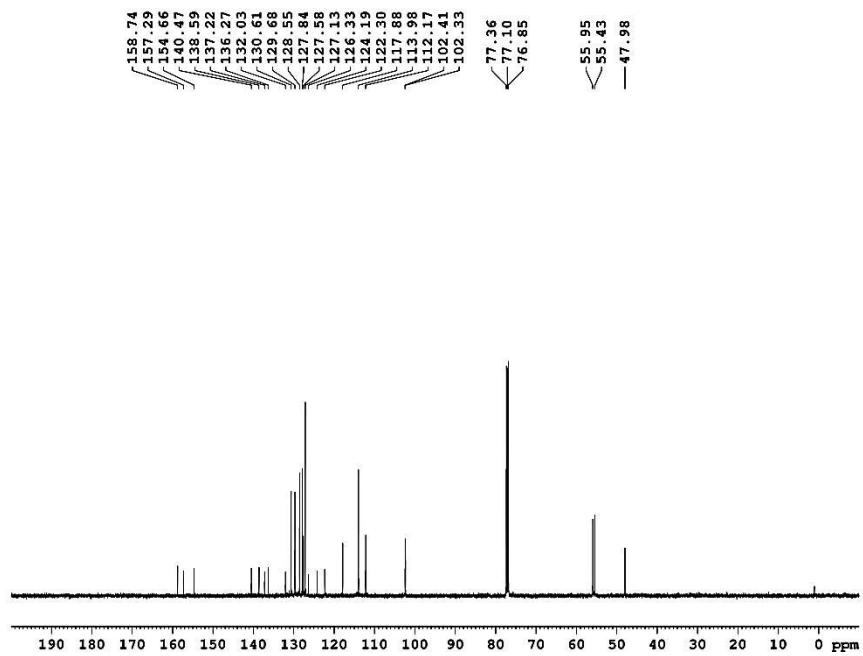

Figure S88.  $^{13}\text{C}$  NMR spectrum of compound 10e

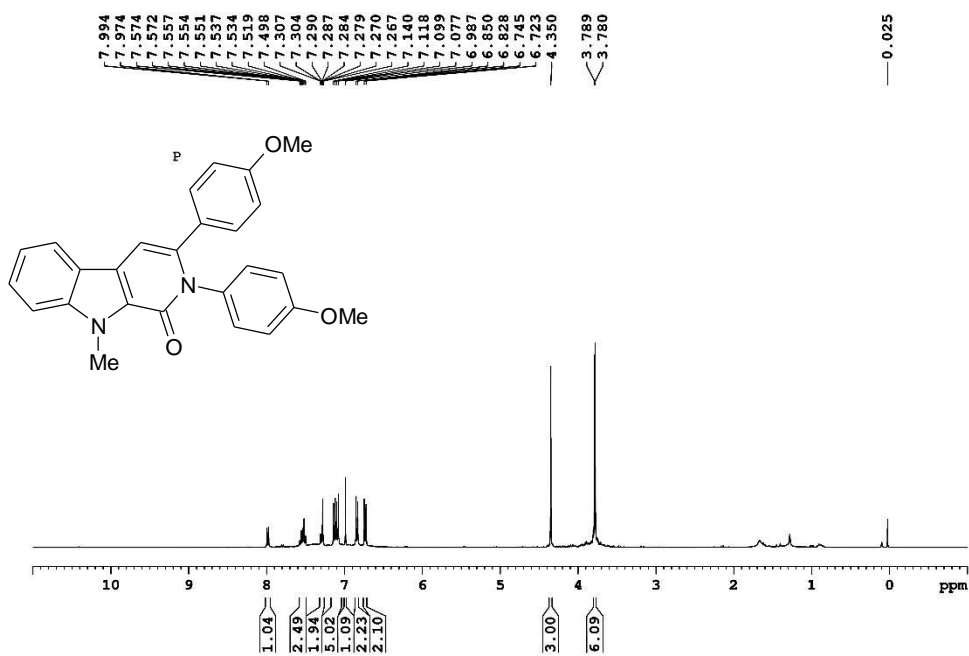

Figure S89. <sup>1</sup>H NMR spectrum of compound 10f

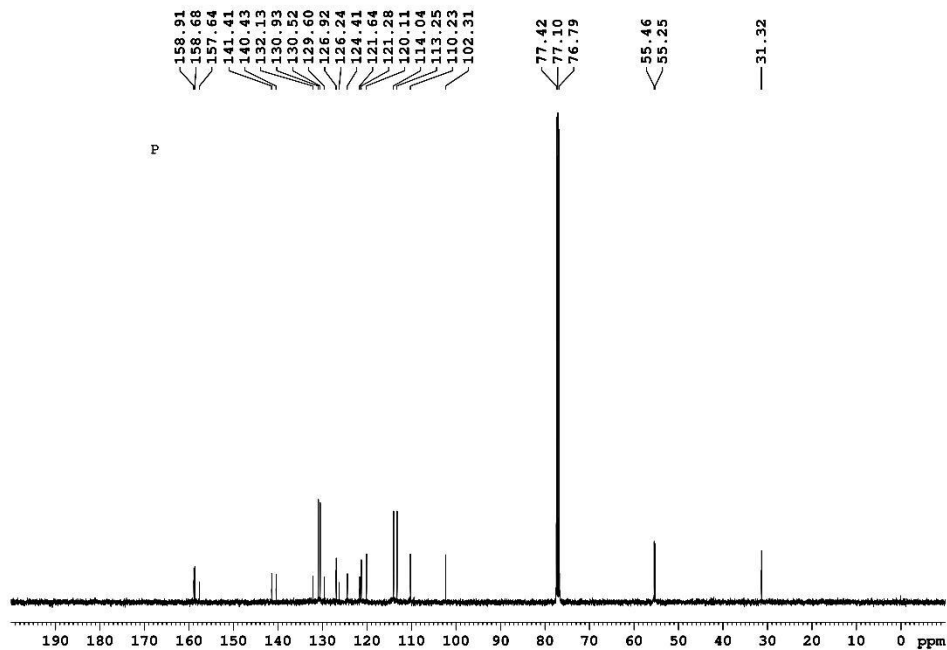

Figure S90. <sup>13</sup>C NMR spectrum of compound 10f

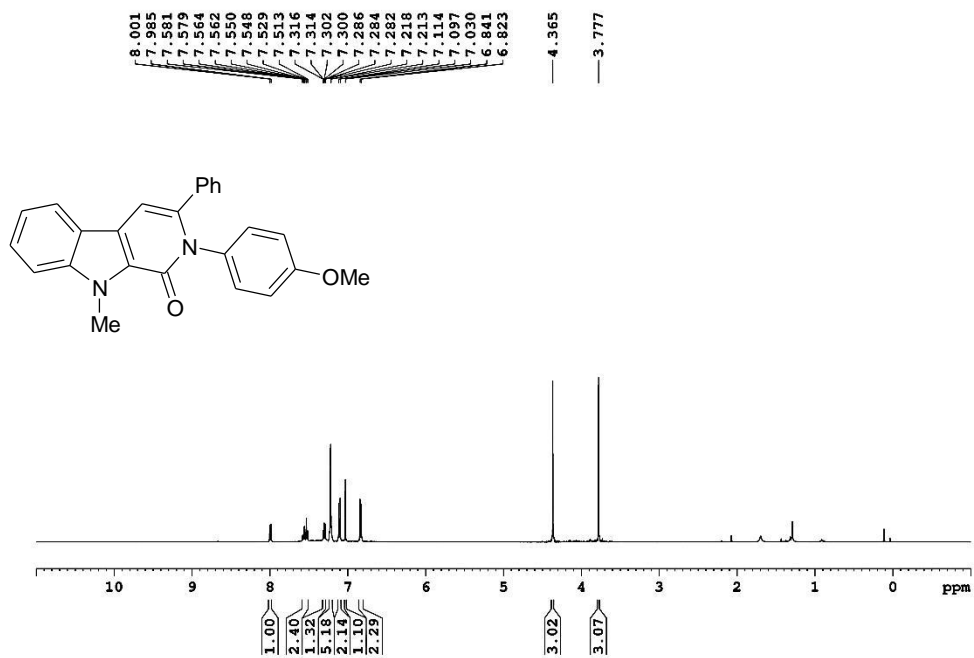

Figure S91. <sup>1</sup>H NMR spectrum of compound **10g**

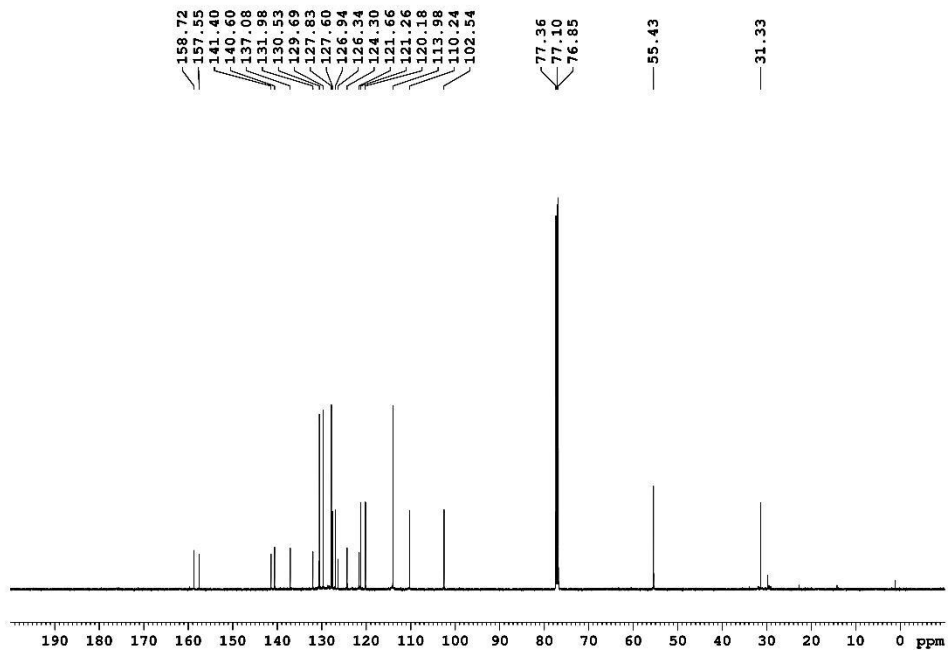

Figure S92. <sup>13</sup>C NMR spectrum of compound **10g**



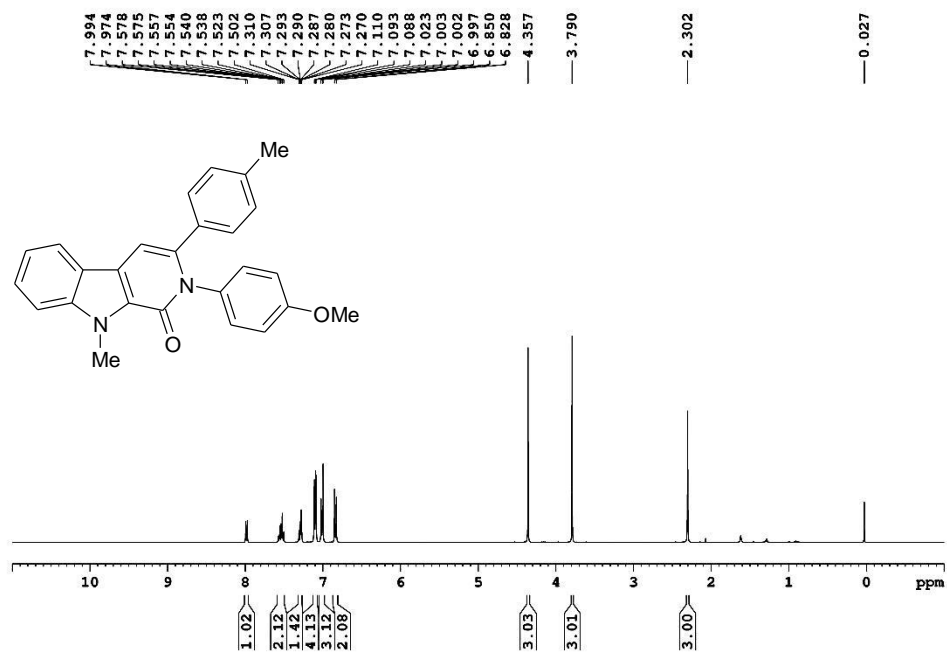

Figure S93. <sup>1</sup>H NMR spectrum of compound 10h

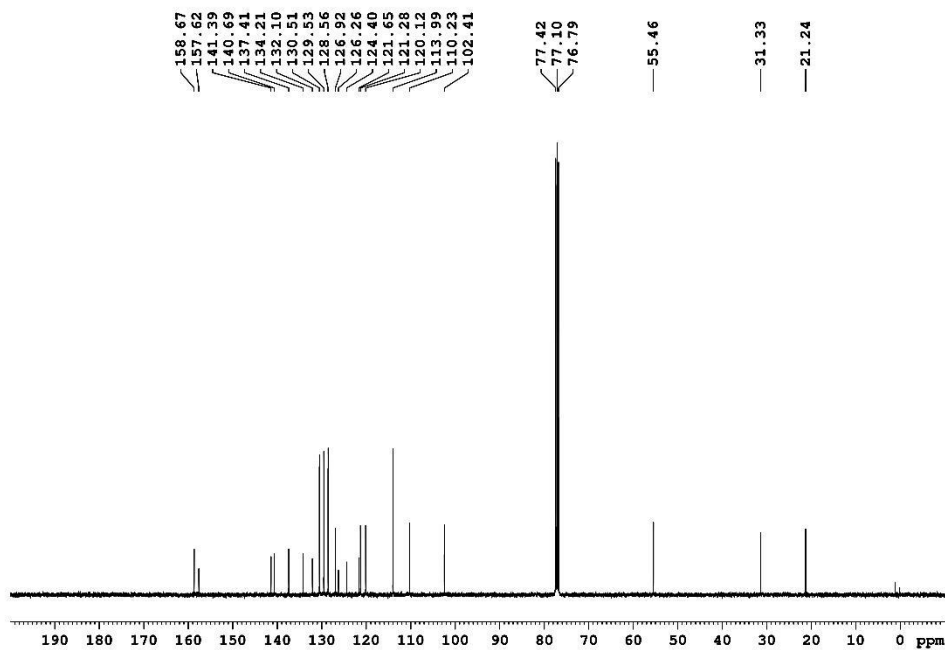

Figure S94. <sup>13</sup>C NMR spectrum of compound 10h

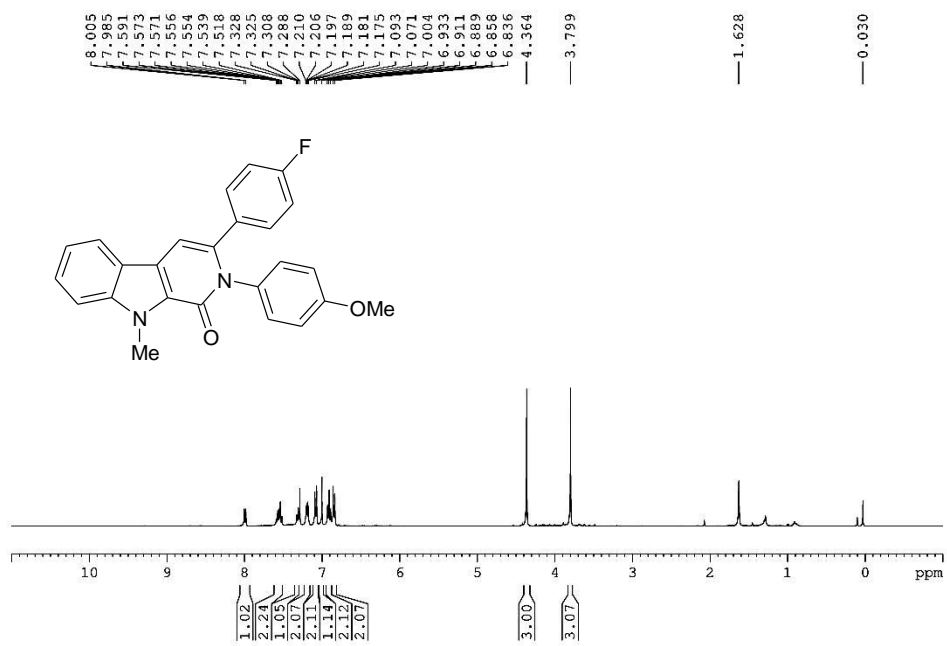

Figure S95. <sup>1</sup>H NMR spectrum of compound **10i**

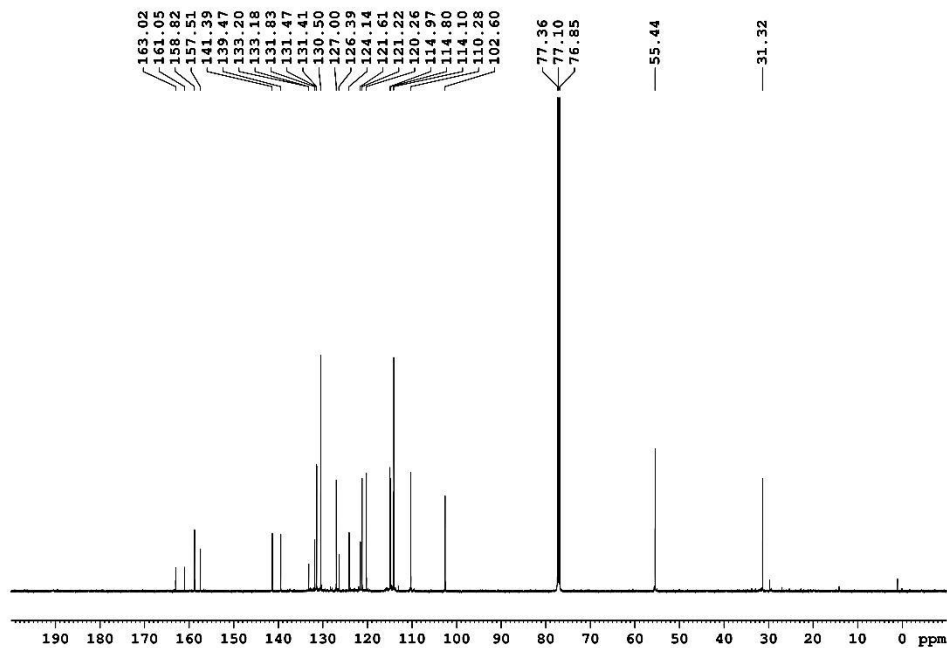

Figure S96. <sup>13</sup>C NMR spectrum of compound **10i**

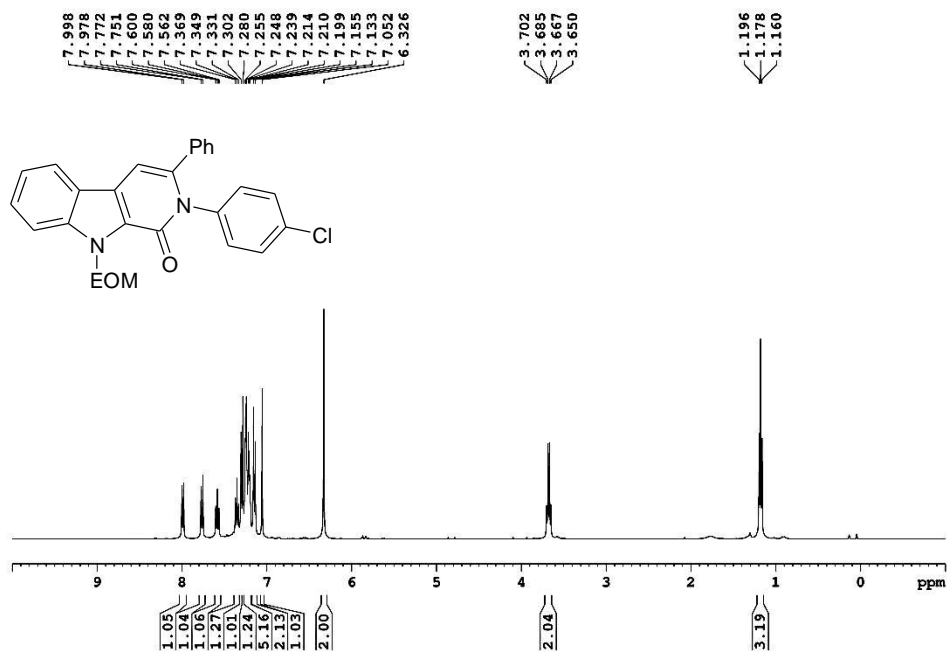

Figure S97. <sup>1</sup>H NMR spectrum of compound 10j

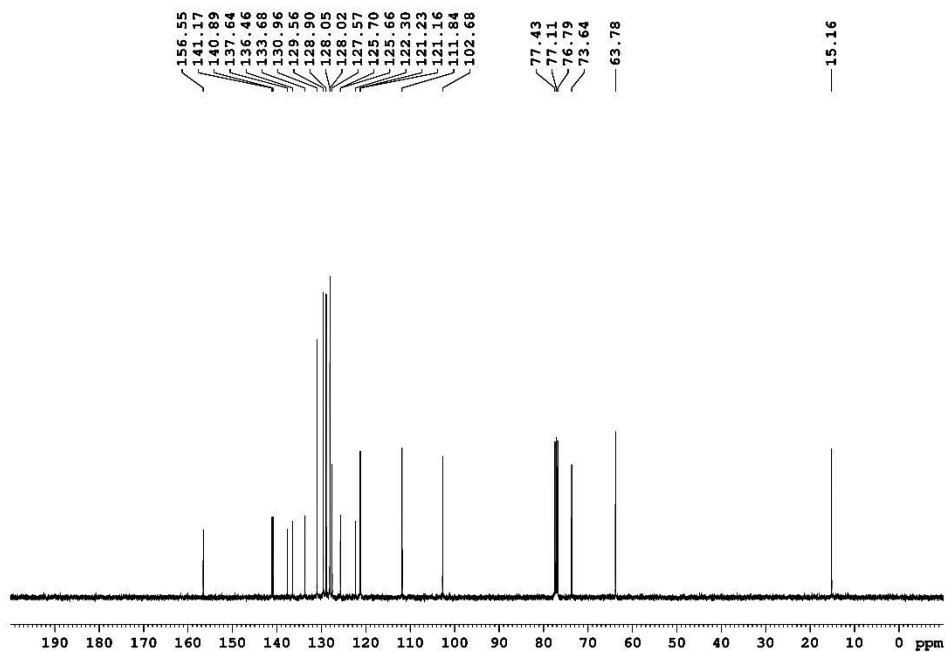

Figure S98. <sup>13</sup>C NMR spectrum of compound 10j

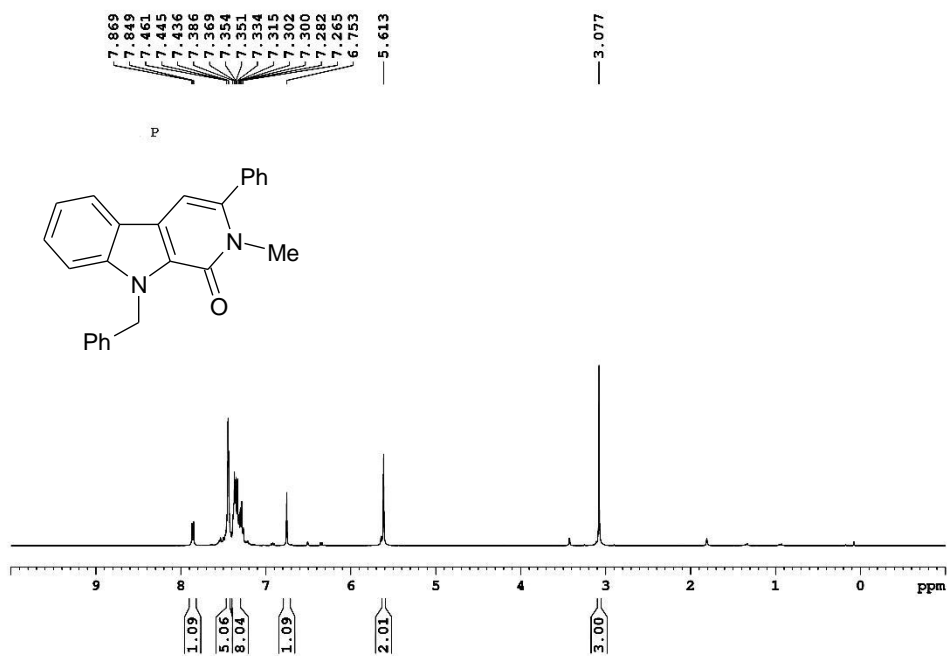

Figure S99. <sup>1</sup>H NMR spectrum of compound **10k**

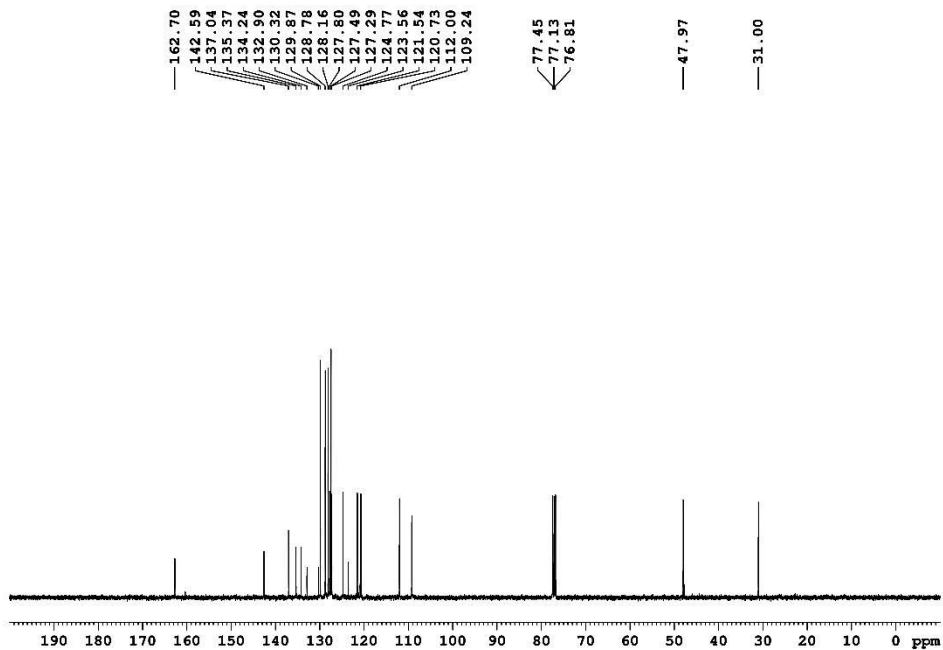

Figure S100. <sup>13</sup>C NMR spectrum of compound **10k**

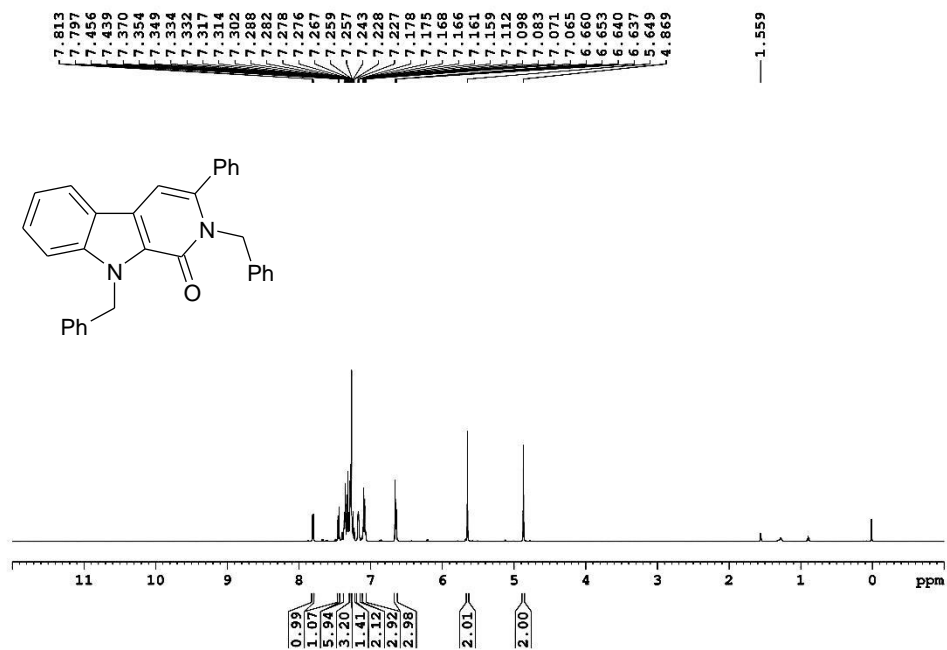

Figure S101. <sup>1</sup>H NMR spectrum of compound 101

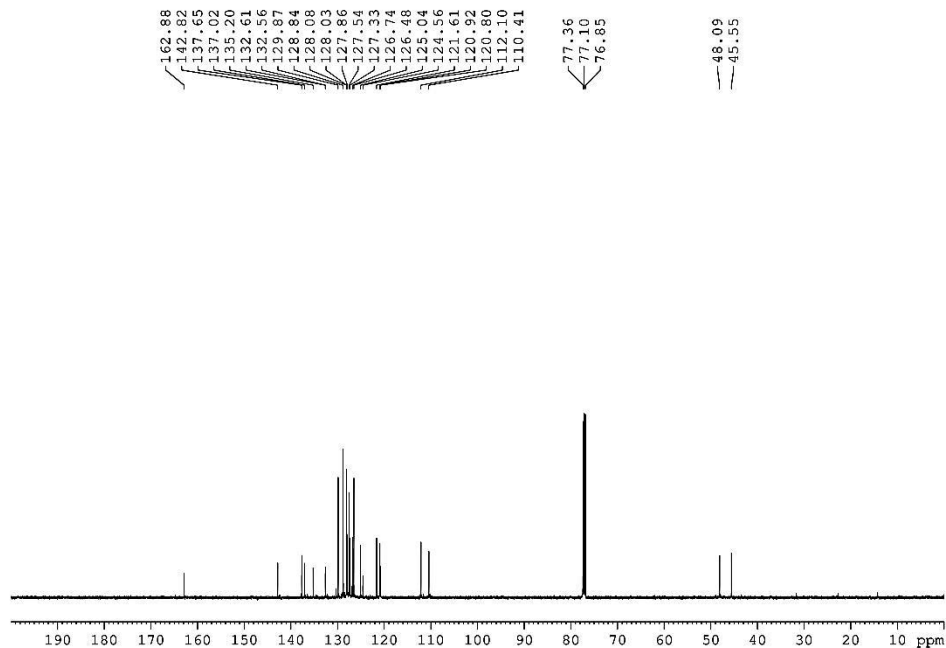

Figure S102. <sup>13</sup>C NMR spectrum of compound 101

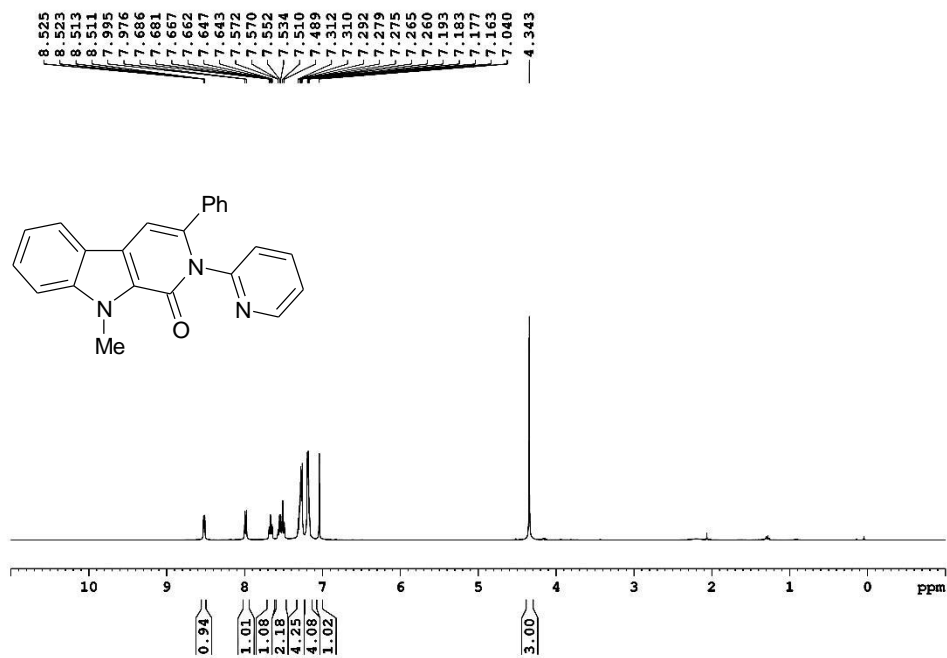

Figure S103. <sup>1</sup>H NMR spectrum of compound 10m

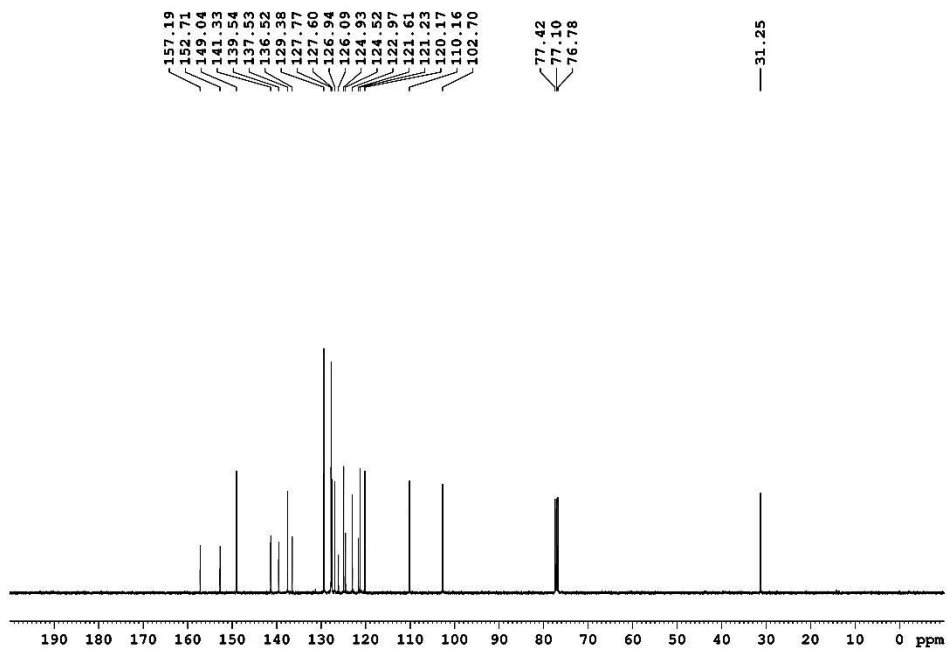

Figure S104. <sup>13</sup>C NMR spectrum of compound 10m

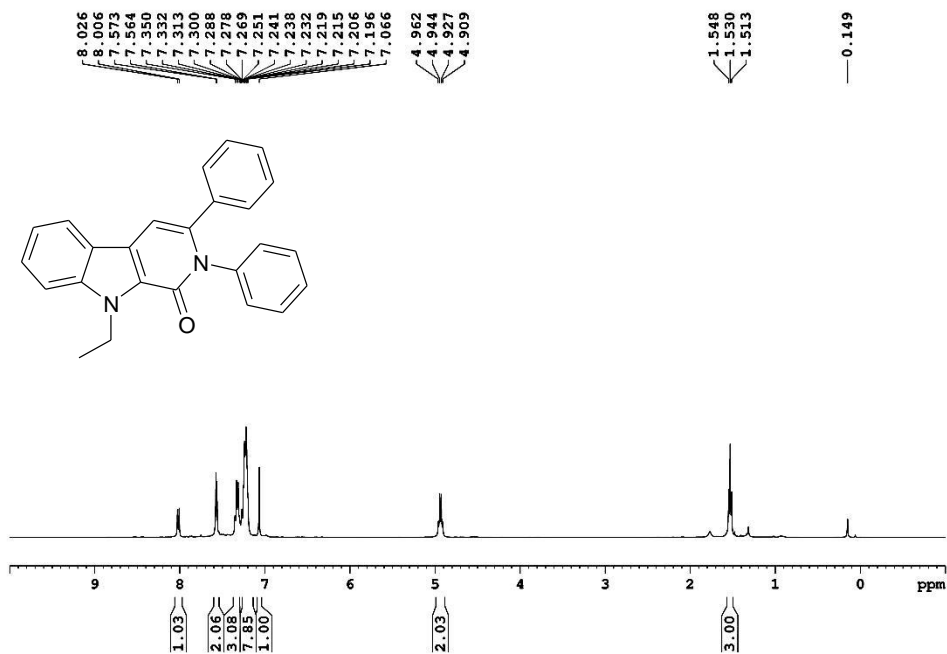

Figure S105. <sup>1</sup>H NMR spectrum of compound 10n

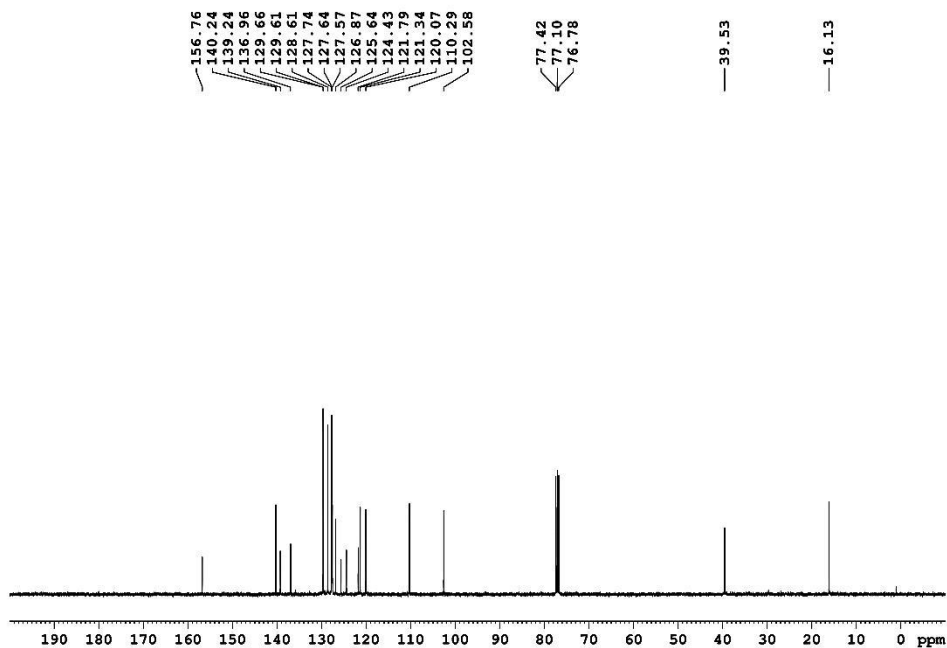

Figure S106. <sup>13</sup>C NMR spectrum of compound 10n

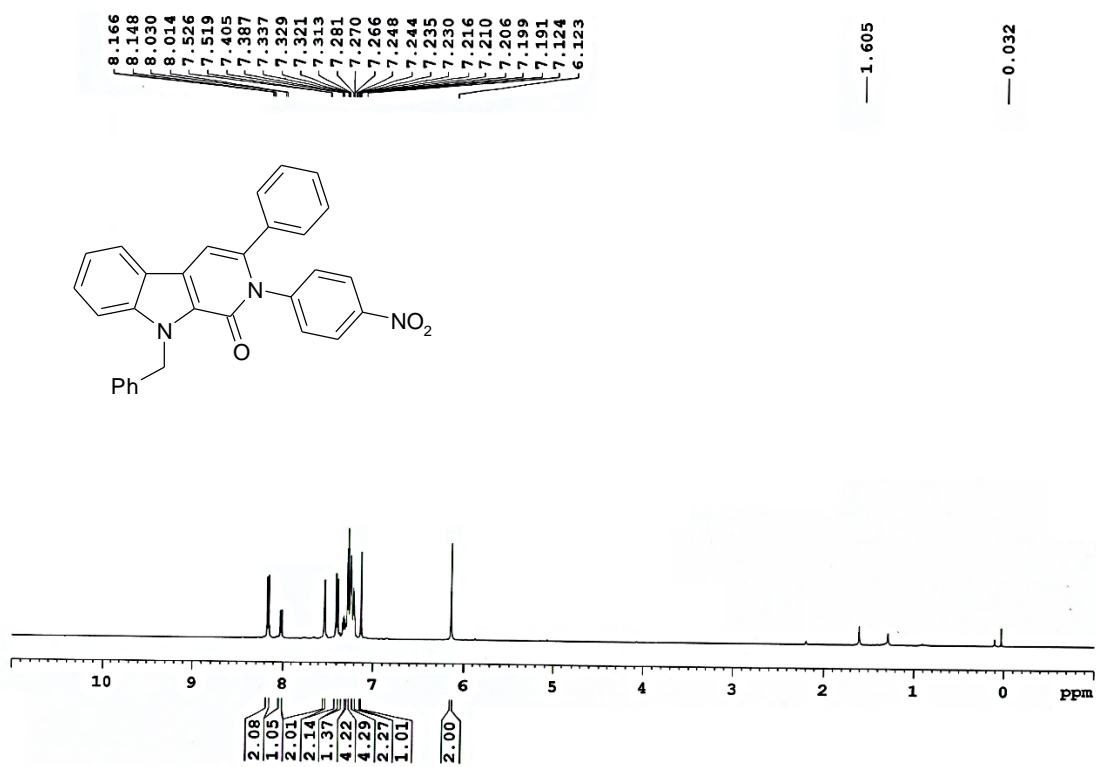

Figure S107. <sup>1</sup>H NMR spectrum of compound **10o**

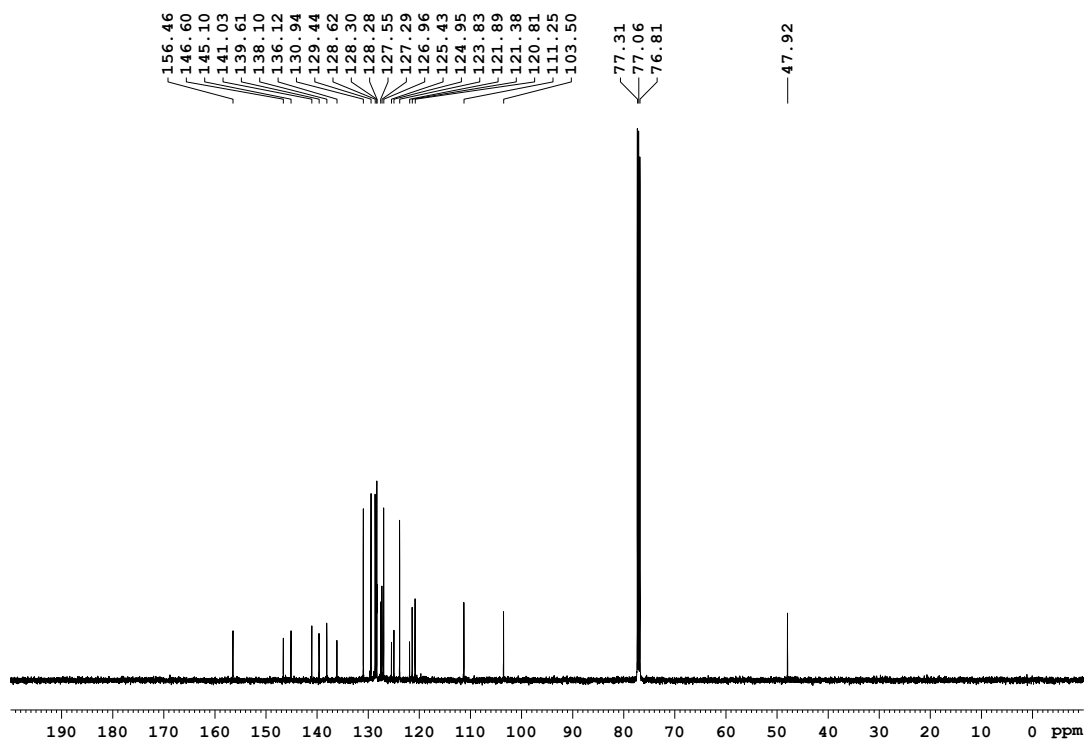

Figure S108. <sup>13</sup>C NMR spectrum of compound **10o**
